# Supplementary material for: Prevalence and severity of patient harm in a sample of UK-hospitalised children detected by the Paediatric Trigger Tool
Source: PubMed Central journal article supplement — BMJ Open. 2014 Jul 3;4(7):e005066. doi: 10.1136/bmjopen-2014-005066 (PMC4091511; doi:10.1136/bmjopen-2014-005066), 2014-07-03
Supplement: bmjopen-2014-005066.draft_revisions.pdf [file bmjopen-2014-005066.draft_revisions.pdf]

# BMJ Open

## Prevalence and severity of patient harm in a sample of UK hospitalised children detected by the Paediatric Trigger Tool.

|                                 |                                                                                                                                                                                                                                                                                                               |
|---------------------------------|---------------------------------------------------------------------------------------------------------------------------------------------------------------------------------------------------------------------------------------------------------------------------------------------------------------|
| Journal:                        | <i>BMJ Open</i>                                                                                                                                                                                                                                                                                               |
| Manuscript ID:                  | bmjopen-2014-005066                                                                                                                                                                                                                                                                                           |
| Article Type:                   | Research                                                                                                                                                                                                                                                                                                      |
| Date Submitted by the Author:   | 18-Feb-2014                                                                                                                                                                                                                                                                                                   |
| Complete List of Authors:       | Chapman, Susan; Great Ormond Street Hospital for Children Foundation NHS Trust, Paediatrics<br>Fitzsimons, John; Our Lady of Lourdes Hospital,<br>Davey, Nicola; NHS Institute for Innovation and Improvement,<br>Lachman, Peter; Great Ormond Street Hospital for Children Foundation NHS Trust, Paediatrics |
| <b>Primary Subject Heading</b>: | Paediatrics                                                                                                                                                                                                                                                                                                   |
| Secondary Subject Heading:      | Patient-centred medicine                                                                                                                                                                                                                                                                                      |
| Keywords:                       | PAEDIATRICS, Quality in health care < HEALTH SERVICES ADMINISTRATION & MANAGEMENT, Risk management < HEALTH SERVICES ADMINISTRATION & MANAGEMENT                                                                                                                                                              |
|                                 |                                                                                                                                                                                                                                                                                                               |

SCHOLARONE™  
Manuscripts

## Title Page

1  
2  
3  
4 **Prevalence and severity of patient harm in a sample of UK hospitalised**  
5  
6 **children detected by the Paediatric Trigger Tool.**  
7  
8  
9

10  
11 **Corresponding Author**

12  
13 Dr. John Fitzsimons  
14 Our Lady of Lourdes Hospital  
15 Drogheda  
16 Co Louth  
17 Ireland  
18 00353 87 9229942  
19 00353 41 987 5212  
20  
21  
22

23 **Authors**

24  
25 Susan M Chapman  
26 Great Ormond Street Hospital for Children NHS Foundation Trust   
27 Great Ormond Street   
28 London WC1N 3JH  
29  
30

31 Nicola Davey  
32 NHS Institute for Innovation and Improvement  
33 University of Warwick Science Park   
34 Millburn Hill Road   
35 Coventry CV4 7HS  
36  
37  
38

39 Peter Lachman  
40 Great Ormond Street Hospital for Children NHS Foundation Trust   
41 Great Ormond Street   
42 London WC1N 3JH  
43  
44

45 **Keywords**

- 46  
47 1. Patient safety  
48 2. Paediatrics  
49 3. Adverse events  
50 4. Patient harm  
51 5. Risk  
52  
53  
54  
55  
56  
57

58 Word count excluding tables and abstract = 3131  
59  
60

## Prevalence and severity of patient harm in a sample of UK hospitalised children detected by the Paediatric Trigger Tool.

### Abstract

Patient safety is now a key priority of health care. The measurement and examination of adverse events that occur to children during hospital admissions is essential if we are to prevent, reduce or ameliorate the harm experienced. The UK Paediatric Trigger Tool (UKPTT) is a method for measuring harm in hospitalised children.

### Objectives

To examine the rate and nature of harm in hospitalised children from centres providing data to the NHS Institute UKPTT data portal, to understand the positive predictive values of triggers, and to make recommendations for the use and further development of the trigger tool.

### Results

Data from 3992 patient admissions were reviewed from 25 hospitals and submitted to the trigger tool portal from February 2008 to November 2011. The hospitals included secondary, tertiary and quaternary centers. At least one adverse event (AE) was reported for 567 (14.2%) patients, with 211 (5.3%) experiencing more than one event. There were 1001 adverse events identified. Where harm occurred it was considered temporary for 923 (92.2%) AEs, however 43 (4.3%) AEs resulted in the need for life-sustaining interventions, 18 (1.8%) AEs led to permanent harm and for 17 children (1.7% of AEs) the AE was believed to have contributed to death. The positive predictive values (PPV) for the triggers ranged from 0 to 80%.

## Conclusions

There is a significant, measurable level of harm experienced by children admitted to hospitals in the UK. While most of this harm is temporary, some is serious.

The UKPTT offers organisations the means to measure and examine the adverse events occurring in their hospital in order to reduce harm.

## Article Summary

### Article Focus

Trigger tool review is a method applied to the examination of medical records that facilitates the identification and measurement of harm that occurred from the delivery of care. This knowledge can be used to learn about harm and to identify and monitor interventions that might prevent, reduce or ameliorate adverse events (AE).

The purpose of this study was to estimate the rate of harm (AE per admission) occurring to children during admission to hospital in the UK. The study also set out to learn about the outcomes of these AEs and the usefulness of each trigger, calculating their positive predictive values (PPV).

### Summary

The study examined harm as detected by a recently developed paediatric trigger tool in 3992 patient admissions across 25 paediatric centres in secondary, tertiary and quaternary care settings in the UK.

At least one AE was reported for 14.2% of patients, with 5.3% experiencing more than one event.

Where harm occurred it was considered temporary for 92.2% of AEs however for 3.5% of AEs it was associated with permanent injury or death.

## Strengths

Trigger tool methodology is proven to be a sensitive and efficient means of detecting harm. This study examines a large number of admissions across multiple care settings and provides important information about the extent and nature of harm experienced by children during hospital care. This information will stimulate discussion about medical harm in paediatrics and how it can be prevented or reduced.

## Limitations

1  
2  
3 There was significant variation between sites regarding the detection of harm. This  
4 reflects the primary purpose of the trigger tool review, which is to help local teams learn  
5 about the harm in their organisation rather than being a method for benchmarking  
6 between organisations.  
7  
8  
9  
10  
11  
12  
13  
14  
15  
16  
17  
18  
19  
20  
21  
22  
23  
24  
25  
26  
27  
28  
29  
30  
31  
32  
33  
34  
35  
36  
37  
38  
39  
40  
41  
42  
43  
44  
45  
46  
47  
48  
49  
50  
51  
52  
53  
54  
55  
56  
57  
58  
59  
60

For peer review only

## Introduction

Providing care that is safe and reliable are fundamental goals of modern healthcare. Patient safety is the prevention, reduction and amelioration of medical harm [1, 2]. Medical harm (synonymous with the terms patient harm and adverse event, AE) is defined as unintended physical injury resulting from or contributed to by medical care that requires additional monitoring, treatment or hospitalisation, or that results in death [3]. Efforts to improve patient safety have been hampered by a lack of reliable data on the prevalence and nature of harm in all areas of practice. Patients and healthcare professional need to understand the burden of harm in healthcare in order to develop effective interventions[4].

The complexity of uncovering harm is reflected in the numerous ways that one has to measure it [5]. Traditional methods such as incident reporting, have limitations, especially that of underreporting, due to the reliance on individual clinicians to recognise and report adverse events, as well as a tendency to focus on error, rather than harm. The measurement and examination of harm, rather than that of error, recognises that efforts to improve patient safety benefit from focusing on incidents that result in actual harm, identifying high risk situations, considering preventability and looking for means of early detection and harm limitation[6]. This deeper understanding of the harm to which patients are exposed is a recent phenomenon and in paediatrics the potential risks to safety are multiple [7]. The call for Zero Harm and the focus on safety in recent reports [8,9], reflects the importance of the identification and understanding of harm as an essential part of patients care. Clinicians have not known the actual levels of harm caused and have relied on a reporting system for clinical incidents. In this

1 paper we assess the introduction of the UK Paediatric Trigger Tool, which aims  
2 to provide clinicians with a methodology to detect of harm and facilitates the  
3 development of interventions to decrease identified harm and provide safer care.  
4  
5  
6  
7  
8  
9

10 Measurement of harm is a complex task and requires a number of different  
11 methods. Harm rates vary widely because of multiple factors such as the  
12 definition of harm used, the methodology employed and the populations selected.  
13  
14  
15  
16  
17  
18  
19  
20  
21  
22  
23  
24  
25  
26  
27  
28  
29  
30  
31  
32  
33  
34  
35  
36  
37  
38  
39  
40  
41  
42  
43  
44  
45  
46  
47  
48  
49  
50  
51  
52  
53  
54  
55  
56  
57  
58  
59  
60

Measurement of harm is a complex task and requires a number of different methods. Harm rates vary widely because of multiple factors such as the definition of harm used, the methodology employed and the populations selected. Until recently most studies sought to establish harm rates for benchmarking purposes over large populations with suggestions that between 3-17% of patients experience an adverse event during a hospital admission[10]. Most of these studies used retrospective, unstructured case note reviews which are labour-intensive, costly and impractical for the routine monitoring of harm[11]. Trigger tool methodology is accepted as one of the ways to measure harm in a way that allows local learning[1, 3, 12]. Trigger tools have also been reported to provide consistent reliable and relevant data at low cost [3,12], although the cost may vary between different hospitals.

### **Development of the Trigger Tool methodology**

The Global Trigger Tool (GTT) was developed by the Institute for Healthcare Improvement (IHI) for use in adult care settings [3]. Triggers tools have also been developed for specific populations and settings, including acute hospitals, surgery [13], critical care [14] and primary care [15]. One study used the GTT to measure harm at a large academic children's hospital in the USA and recommended the development of a paediatric specific tool [16]. Paediatric specific trigger tools have been developed for neonatology [17], paediatric

1 critical care [18, 19] and medications [20, 21] and a trigger tool for harm in  
2 hospitalised children was developed in Canada [22]. A UK version of the acute  
3 adult GTT had already been developed but this was not applicable to a paediatric  
4 population. In 2008, the NHS Institute for Innovation and Improvement undertook  
5 to develop a UK paediatric trigger tool that could be applied to all levels of acute  
6 paediatric care.  
7  
8  
9  
10  
11  
12  
13  
14

### 15 **Trigger tool Method for reviewing case notes.**

16  
17  
18 The trigger tool method consists of a retrospective review of a 20 sets of medical  
19 records each month using a standardised methodology. A random sample of 20  
20 in-patient case notes is selected using a randomisation matrix on a monthly  
21 basis. The medical record is examined in a structured process for 20 minutes to  
22 search for “triggers”. A “trigger” is a predefined event that alerts the reviewer to  
23 the possibility of patient harm. Once a trigger is identified, the reviewer uses  
24 clinical expertise to examine the records in more detail to understand the  
25 circumstances around the event. If harm is suspected a second reviewer (usually  
26 a physician) is consulted to confirm and grade the adverse event using the NCC  
27 MERP grading system [23]  
28  
29  
30  
31  
32  
33  
34  
35  
36  
37  
38  
39  
40  
41  
42  
43  
44  
45

46 An example of a trigger is the administration of the antidote medication naloxone  
47 (a trigger) to reverse the effects of opiates. This alerts the reviewer of a possible  
48 overdose of opioids. The reviewer examines the relevant parts of the healthcare  
49 record to assess whether the use of naloxone was for this reason or not. If this is  
50 the reason then the harm is graded.  
51  
52  
53  
54  
55  
56  
57  
58  
59  
60



## Development of the UK PTT

The NHS Institute sponsored the development of a paediatric trigger tool based on the preliminary findings from the Canadian pediatric trigger tool [22] and the UK Acute Trigger Tool [24]. The development was a co-production involving the collaboration of patient safety experts from the NHS Institute, international leaders in paediatric trigger tool development and clinical experts from nine UK hospitals including children's hospitals and district general hospitals. Following discussion and testing the group agreed on 40 paediatric oriented triggers to be included in the UKPTT. These were based on the triggers used in other tools, UK evidence of adverse events and the experience of the reference group in harm and adverse events (a subset of the co-production group). The UK tool was developed to increase ownership by clinicians who would use it. The Canadian tool had not been published and no other paediatric trigger tools were available.

The UKPTT advocates a working definition of patient harm as *“anything, which you would not like to happen to yourself or a member of your family as a result of, or contributed to by, medical care”*. The decision to aim for a broad definition was to focus on the patient rather than on the medical system – a less defensive approach. This is a broader definition than that given by Griffin et al [3] and aimed to encourage clinicians to explore a holistic concept of harm than that traditionally reported. It allows the inclusion of acts of omission as well as commission. The definition include missed or delayed diagnosis along with physical and psychological harm, which could be identified by additional triggers.

1 Through the coproduction support was developed for UK PTT users such as  
2 face-to-face training, on line and printed guidance and standardised data  
3 collection forms. The tool and guidance for its use remains freely available at  
4 [www.institute.nhs.uk/paediatrictriggertool](http://www.institute.nhs.uk/paediatrictriggertool) or from the authors.  
5  
6  
7  
8  
9

### 10 11 12 13 **Data Collection**

14 As part of the UKPTT development, the NHS Institute created a web-based  
15 trigger tool portal into which participating hospitals entered anonymised data.  
16 The portal calculated harm rates and produced run charts that hospitals could  
17 download. Contributing hospitals consented to their data being collated and  
18 published to further the understanding of harm in hospitalised children in the UK.  
19 Participating hospitals developed local administrative and governance  
20 arrangements for PTT reviews following the standard guidance.  
21  
22  
23  
24  
25  
26  
27  
28  
29  
30  
31  
32  
33  
34

### 35 **Aims and methodology**

36 The aims of this study are to:

- 37  
38  
39  
40  
41  
42  
43  
44  
45  
46  
47  
48  
49  
50  
51  
52  
53  
54  
55  
56  
57  
58  
59  
60  
▪ Describe the rate and severity of harm occurring in hospitalised children from UK centres submitting data to the NHS Institute's Trigger Tool portal.
- Report the frequency and positive predictive value (PPV) of triggers to detect harm.
- Make recommendations for further application and development of the tool.

Participating hospitals, which included secondary, tertiary and quaternary centers, were trained in trigger tool methodology either by experts at the NHS

1 Institute or by using on-line resources with telephone support. Data was collected  
2  
3 through the on-line trigger tool portal.  
4  
5  
6  
7

## 8 **Results**

9  
10 Data from 3992 case note reviews from 25 hospitals submitted to the trigger tool  
11 portal between February 2008 and November 2011 were analysed. Nine  
12 hospitals were children's hospitals; the remainder were classed as district  
13 general hospitals. Data from four additional hospitals that used the portal were  
14 excluded because they each submitted less than 10 case entries. Harm was  
15 recorded as occurring for 567 patients (14.2%) while the majority (85.8%) of  
16 patients experienced no evidence of harm. Reviewers identified 1001 adverse  
17 events, an average of 1.8 events per patient experiencing harm.  
18  
19  
20  
21  
22  
23  
24  
25  
26  
27  
28  
29  
30  
31

32 There was considerable variation between hospitals in the number of case notes  
33 reviewed (12 – 622), the number of triggers detected (17 – 1877) and overall  
34 harm rate reported (0% - 100%). Results from each hospital are reported in  
35 Table 1. Of the 567 children who suffered an AE, the majority (n=356, 63%)  
36 experienced a single event. However 211 (37%) of patients suffered more than  
37 one AE within the same admission. One patient was reported to have suffered  
38 10 AEs in a single admission. A summary of the number of adverse events per  
39 case is presented in Table 2.  
40  
41  
42  
43  
44  
45  
46  
47  
48  
49  
50  
51  
52

53 Individual triggers varied in their ability to lead to detection of harm. The trigger  
54 *Complications of procedure or treatment* yielded the greatest amount of harm  
55 (182 AEs). The PPV varied from 80.0% for *surgical site infection* to 2.62% for  
56  
57  
58  
59  
60

1 *missing observations/early warning scores*. The PPV was generally low in  
2  
3 frequently identified triggers, such as *missing observations/early warning scores*  
4  
5 (PPV 2.6%) and *unplanned admission* (PPV 4.0%). The positive triggers,  
6  
7  
8 adverse events and PPV for each trigger are displayed in Table 3.  
9

10  
11  
12  
13 The majority of adverse events (n=923, 92.2%) resulted in temporary harm to the  
14  
15 patient (grade E and F – see Table 5 [23]), 43 AEs required life-sustaining  
16  
17 interventions and 18 resulted in permanent harm. In 17 cases, the adverse event  
18  
19 was believed to have contributed to the child's death (Table 4).  
20  
21  
22  
23  
24

## 25 **Discussion**

26  
27 This paper represents the largest report of paediatric harm using trigger tool  
28  
29 methodology in the United Kingdom. Whilst the primary purpose of a trigger tool  
30  
31 is to gain local data for understanding harm in order to improve patient safety  
32  
33 locally, we can learn about harm by examining the pooled experiences of the  
34  
35 contributing hospitals. The ability to capture, measure and view the results of  
36  
37 case notes review using the PTT on a routine basis is a cost effective method of  
38  
39 data capture and analysis and of significant value to individual hospitals.  
40  
41  
42  
43  
44  
45

46 The overall harm rate (the percentage of children experiencing one or more AEs  
47  
48 during an admission) identified in this study was 14.2%. Previous studies  
49  
50 focusing on hospitalised children have identified harm rates of between 1% and  
51  
52 25.8% per admission for the general paediatric hospital population [6, 20, 21] and  
53  
54 higher rates within the paediatric intensive care population of 26.1% to 62%  
55  
56  
57 [18,19,26]. Two recent studies have examined harm in paediatric hospital  
58  
59  
60

1 populations using trigger tool methodology. The Canadian Paediatric Trigger  
2 Tool (CPTT) [25] found a physician reported harm rate of 15.1% of admissions  
3 during a validation study across six paediatric hospitals in Canada. Like the  
4 UKPTT the CPTT has been adapted to make triggers more sensitive and specific  
5 to paediatric situations. The second study, at a single paediatric academic  
6 medical center in the US using the adult Global Trigger Tool (GTT) found an  
7 overall harm rate of 25.8% [16].  
8  
9  
10  
11  
12  
13  
14  
15  
16  
17  
18  
19

20 Variation in harm rates may reflect a number of factors. Different methodologies  
21 yield different rates of AE identification. Trigger tools are reported to yield higher  
22 rates of AE identification than traditional methods such as self-reporting and  
23 unstructured case note review [1,26]. Definitions of harm vary as do their  
24 interpretation. Professional groups may interpret AEs differently [25].  
25  
26  
27  
28  
29  
30  
31

32 Assessments of inter-rater reliability have reported high levels of agreement  
33 between review team members [16,27,28], but variability between different  
34 hospital departments teams [29]. In addition some organisations or teams set a  
35 lower threshold for what they see as harm and they may change this over time.  
36 Finally, different populations are exposed to different levels of harm depending  
37 on the complexity of their illness and the intensity and duration of their care[20].  
38 Most studies report a harm rate per admission meaning that longer admissions  
39 are more exposed to opportunity for harm.  
40  
41  
42  
43  
44  
45  
46  
47  
48  
49  
50  
51

52 The same reasons that explain the variation between international studies  
53 explain much of the variation between hospitals in this study. Training was  
54 provided but no independent assessment was made of reviewer's interpretations  
55  
56  
57  
58  
59  
60

1 or competence. The extremes of harm reported or its absence were seen in  
2  
3 hospitals uploading low volumes of reviews and may be interpreted as the  
4  
5 relative inexperience of the reviewers [30]. There is also a wide variety across  
6  
7 the level of hospital represented with the corresponding impact on risk due to  
8  
9 patient complexity, need for surgery or critical care and length of stay.  
10  
11

12  
13  
14  
15 One could ask whether this level of variation diminishes the findings of the study.  
16  
17 On the contrary, we believe it represents a real portrayal of complex issues. It is  
18  
19 also a taste of what individual organisations can expect if they start to use the  
20  
21 PTT to help understand and reduce the harm in their institution. They will need to  
22  
23 consider all of these issues as they interpret their own findings.  
24  
25  
26  
27  
28  
29

30 The majority (92.3%) of AEs identified in this study represented temporary harm  
31  
32 resulting in the child either requiring an intervention, admission to hospital or  
33  
34 prolongation of their hospital stay. Whilst severe harm (permanent harm or harm  
35  
36 that requiring life sustaining measures or contributed to death) was rare, it still  
37  
38 constituted 7.8% of harm identified. Similar findings with respect to severity have  
39  
40 been reported with 10% of AEs classified as severe in one study of harm in PICU  
41  
42 [18]. A study of AEs in hospitalised children reported that clinicians do not always  
43  
44 recognize harm, even when the consequences to the child are severe [31]. In this  
45  
46 study multiple AE were relatively common, with 37% of those experiencing harm  
47  
48 suffering two or more AE in the same admission, far higher than previous studies  
49  
50  
51  
52 [16,25].  
53  
54  
55  
56  
57  
58  
59  
60

1 Triggers varied in their positive predictive values for AEs. Screening for triggers  
2 is the key task of the trigger tool method. Triggers that infrequently identify harm  
3  
4 is the key task of the trigger tool method. Triggers that infrequently identify harm  
5  
6 could be removed to increase the efficiency of the tool. Some triggers may be  
7  
8 important markers of care quality, such as the *missing /incomplete early warning*  
9  
10 *score or baseline observations* despite the inability of the trigger to identify  
11  
12 specific patient harm [32]. This will influence the next iteration of the trigger tool  
13  
14 as we refine the triggers and consider taking out some of those that had a low  
15  
16 PPV.  
17  
18  
19

20  
21  
22 A number of studies have examined the possibility of automated trigger detection  
23 from electronic medical records which may make the process easier [21,33]. We  
24 believe that there is value in the manual approach, and that it will be some time  
25 before hospitals in the UK are converted to electronic medical records. Users of  
26 the UKPTT have expressed to us the benefits of having an opportunity to  
27 examine the quality of medical and nursing note keeping and observations, which  
28 in some centers has resulted in initiatives to improve these elements.  
29  
30  
31  
32  
33  
34  
35  
36  
37  
38  
39  
40

### 41 **Limitations**

42  
43 There are a number of limitations to this study. Although the methodology is  
44 standard, we did not attempt to revalidate it. The UKPTT differs from other trigger  
45 tools only in the constituent triggers. This study has provided PPVs for the 40  
46 triggers included in the UKPTT, which may be used to consider changes to the  
47 trigger profile. Other triggers may be more useful and could be tested for future  
48 versions of the tool.  
49  
50  
51  
52  
53  
54  
55  
56  
57  
58  
59  
60

1 The determination of inter-rater reliability may be important within departments  
2  
3 but not necessarily between hospitals. The UKPTT is not recommended for  
4  
5 benchmarking as the focus is on developing data for improvement rather than  
6  
7 data for judgment [34]. The methodology recommends consistency in the  
8  
9 reviewing teams so that intra-reliability is not an issue [35]. We did not attempt to  
10  
11 standardise the method of PTT data collection outside of the support provided  
12  
13 and the recommendation on randomisation. Individual institutions made their own  
14  
15 arrangements in terms of choosing and training reviewers. There were no checks  
16  
17 of competence of reviewers or inter-rater reliability or of the accuracy of the data  
18  
19 entered via the portal.  
20  
21  
22  
23  
24  
25  
26

### 27 **Strengths**

28  
29 Parry et al [36] note that the approach should be to look at all harm not only  
30  
31 preventable harm. We believe every AE provides insight for improvement,  
32  
33 whether deemed preventable or not [18].  
34  
35  
36  
37  
38

39 We did not attempt to find out how many of these AE were detected through  
40  
41 other methods such as incident reporting (we expect that many were). The  
42  
43 purpose of the UKPTT is to extend the ability to detect harm rather than replace  
44  
45 other approaches.  
46  
47  
48  
49  
50  
51  
52  
53  
54

### 55 **Conclusions and recommendations**

56  
57  
58  
59  
60



1 In the context of the increasing demands to improve quality and safety for  
2 patients, the UK PTT provides a framework for paediatric clinicians to assess the  
3 rate of harm for their individual units, and the quality of their record keeping. This  
4 study highlights that currently there is a significant, measurable level of harm,  
5 which is sometimes severe, experienced by children admitted to hospitals in the  
6 UK. There is a range of predictive values for the triggers and some may be more  
7 useful than others. These findings will inform future modifications of the PTT  
8 including modifying or removing triggers. It will be important to test any new or  
9 augmented triggers with paediatric teams to assess their usefulness.  
10  
11  
12  
13  
14  
15  
16  
17  
18  
19  
20  
21  
22  
23  
24

25 The recognition and examination of adverse events through methods such as the  
26 UK PTT offers the potential to improve paediatric patient safety by concentrating  
27 efforts on strategies that reduce patient harm, rather than errors. The key is to  
28 produce information that promotes learning and improvement with clinicians  
29 accepting their role to decrease harm from the perspective of the patient rather  
30 than that of the healthcare provider.  
31  
32  
33  
34  
35  
36  
37  
38  
39  
40  
41

42 We recommend that the UK PTT be used routinely in hospitals to assess harm  
43 and to help develop improvement interventions to reduce it. Although the PTT  
44 has been mainly used in children's hospitals, it can be used in District General or  
45 community hospitals with a different spectrum of harm being detected. The UK  
46 PTT does not replace other reporting mechanisms but is a useful addition to the  
47 methods already used to understand the harm caused to children in hospital  
48 care. Harm needs to be detected and assessed through a number of lenses and  
49 this lens allows clinicians to further understand what they do and how it impacts  
50  
51  
52  
53  
54  
55  
56  
57  
58  
59  
60

1 on children. It provides a way to move from a reactive approach to safety to one  
2  
3  
4 that is more proactive and founded in harm free care.  
5  
6

7 *Susan Chapman and John Fitzsimons are joint first authors*  
8  
9

### 10 **Acknowledgement:**

11  
12 The authors would like to thank Matt Tite at the NHS Institute for Innovation and  
13  
14 Improvement for extracting and processing the data.  
15  
16

17  
18 The authors would also like to thank all the participating institutions whose  
19  
20 unidentifiable data has been made available for the analysis, and those who  
21  
22 participated in the development of the UKPTT.  
23  
24

### 25 **Competing Interest:**

26  
27  
28 None known.  
29  
30  
31  
32  
33  
34  
35  
36  
37  
38  
39  
40  
41  
42  
43  
44  
45  
46  
47  
48  
49  
50  
51  
52  
53  
54  
55  
56  
57  
58  
59  
60

Table 1: Number of case reviews, positive triggers and adverse events by individual hospital

| Hospital       | Case notes reviewed | Positive triggers | Average number of triggers per case note review | Adverse events | Average number of AE per case note review | Number of individual patients harmed |
|----------------|---------------------|-------------------|-------------------------------------------------|----------------|-------------------------------------------|--------------------------------------|
| A              | 622                 | 1877              | 3.02                                            | 309            | 0.50                                      | 162                                  |
| B              | 369                 | 579               | 1.57                                            | 66             | 0.18                                      | 31                                   |
| C              | 321                 | 415               | 1.29                                            | 60             | 0.19                                      | 37                                   |
| D              | 309                 | 481               | 1.56                                            | 117            | 0.38                                      | 49                                   |
| E              | 285                 | 414               | 1.45                                            | 84             | 0.29                                      | 43                                   |
| F              | 271                 | 454               | 1.68                                            | 112            | 0.41                                      | 54                                   |
| G              | 260                 | 484               | 1.86                                            | 48             | 0.18                                      | 39                                   |
| H              | 241                 | 418               | 1.73                                            | 6              | 0.02                                      | 4                                    |
| I              | 195                 | 432               | 2.22                                            | 14             | 0.07                                      | 14                                   |
| J              | 195                 | 52                | 0.27                                            | 3              | 0.02                                      | 3                                    |
| K              | 190                 | 446               | 2.35                                            | 45             | 0.24                                      | 40                                   |
| L              | 124                 | 173               | 1.40                                            | 17             | 0.14                                      | 15                                   |
| M              | 71                  | 52                | 0.73                                            | 0              | 0.00                                      | 0                                    |
| N              | 70                  | 171               | 2.44                                            | 8              | 0.11                                      | 7                                    |
| O              | 68                  | 141               | 2.07                                            | 8              | 0.12                                      | 7                                    |
| P              | 68                  | 107               | 1.57                                            | 1              | 0.01                                      | 1                                    |
| Q              | 66                  | 79                | 1.20                                            | 15             | 0.23                                      | 11                                   |
| R              | 62                  | 84                | 1.35                                            | 15             | 0.24                                      | 12                                   |
| S              | 60                  | 121               | 2.02                                            | 32             | 0.53                                      | 15                                   |
| T              | 59                  | 90                | 1.53                                            | 2              | 0.03                                      | 1                                    |
| U              | 23                  | 22                | 0.96                                            | 4              | 0.17                                      | 3                                    |
| V              | 19                  | 14                | 0.74                                            | 1              | 0.05                                      | 1                                    |
| W              | 17                  | 26                | 1.53                                            | 4              | 0.24                                      | 4                                    |
| X              | 15                  | 50                | 3.33                                            | 27             | 1.80                                      | 11                                   |
| Y              | 12                  | 17                | 1.42                                            | 3              | 0.25                                      | 3                                    |
| <b>Overall</b> | <b>3992</b>         | <b>7199</b>       | <b>1.65</b>                                     | <b>1001</b>    | <b>0.26</b>                               | <b>567</b>                           |

1  
2  
3  
4  
5  
6  
7  
8  
9  
10  
11  
12  
13  
14  
15  
16  
17  
18  
19  
20  
21  
22  
23  
24  
25  
26  
27  
28  
29  
30  
31  
32  
33  
34  
35  
36  
37  
38  
39  
40  
41  
42  
43  
44  
45  
46  
47  
48  
49

**Table 2: Number of adverse events per patient**

| Number of AE per case | Number of Patients (n= 3992) | % of patient who suffered harm (n=567) |
|-----------------------|------------------------------|----------------------------------------|
| 0                     | 3425                         | N/A                                    |
| 1                     | 356                          | 62.8%                                  |
| 2                     | 111                          | 19.6%                                  |
| 3                     | 40                           | 7.0%                                   |
| 4                     | 28                           | 4.9%                                   |
| 5                     | 16                           | 2.8%                                   |
| 6                     | 8                            | 1.4%                                   |
| 7                     | 5                            | 0.9%                                   |
| 9                     | 2                            | 0.4%                                   |
| 10                    | 1                            | 0.2%                                   |

For peer review only

Table 3: Trigger descriptors, AE and positive predictive value

| Trigger Code | Trigger description                                                                     | Adverse events | Positive Triggers | Severity of harm |    |   |    |   | Trigger PPV |
|--------------|-----------------------------------------------------------------------------------------|----------------|-------------------|------------------|----|---|----|---|-------------|
|              |                                                                                         |                |                   | E                | F  | G | H  | I |             |
| PG8          | Complication of procedure or treatment                                                  | 182            | 257               | 99               | 63 | 6 | 11 | 3 | 70.8%       |
| PG3          | Readmission to hospital within 30 days                                                  | 107            | 462               | 36               | 68 | 0 | 1  | 2 | 23.2%       |
| PG2          | Tissue damage or pressure ulcer                                                         | 81             | 250               | 66               | 12 | 0 | 1  | 2 | 32.4%       |
| PG4          | Unplanned admission                                                                     | 68             | 1668              | 23               | 41 | 0 | 3  | 1 | 4.1%        |
| PO1          | Other (specify)                                                                         | 60             | 425               | 48               | 10 | 0 | 1  | 1 | 14.1%       |
| PS3          | Surgical site infection                                                                 | 48             | 60                | 24               | 22 | 0 | 1  | 1 | 80.0%       |
| PM5          | Anti-emetic given                                                                       | 41             | 507               | 40               | 1  | 0 | 0  | 0 | 8.1%        |
| PG10         | Hypoxia O <sub>2</sub> sat <85%                                                         | 36             | 157               | 31               | 2  | 3 | 0  | 0 | 22.9%       |
| PG1          | EWS or baseline observations missing/incomplete or score/observation requiring response | 35             | 1362              | 26               | 8  | 0 | 1  | 0 | 2.6%        |
| PG9          | Transfer to higher level of care (inc admission to specialist unit, ICU/HDU)            | 35             | 273               | 15               | 14 | 0 | 5  | 1 | 12.8%       |
| PS1          | Return to theatre                                                                       | 33             | 75                | 15               | 15 | 2 | 1  |   | 44.0%       |
| PM7          | IV Bolus ≥ 10ml/kg colloid or crystalloid given                                         | 31             | 386               | 22               | 5  | 1 | 1  | 2 | 8.0%        |
| PG11         | Cancelled elective procedure/ delayed discharge                                         | 24             | 55                | 10               | 12 | 1 | 0  | 1 | 43.6%       |
| PL14         | Positive blood culture                                                                  | 23             | 55                | 18               | 4  | 0 | 1  | 0 | 41.8%       |
| PL13         | Nosocomial Pneumonia                                                                    | 21             | 28                | 8                | 10 | 0 | 2  | 1 | 75.0%       |
| PL5          | Na <sup>+</sup> <130 or >150                                                            | 14             | 71                | 12               | 1  | 0 | 1  | 0 | 19.7%       |
| PG5          | Cranial Imaging                                                                         | 10             | 141               | 4                | 2  | 3 | 0  | 1 | 7.0%        |
| PL8          | Hyperglycaemia (>12mmol/l)                                                              | 11             | 65                | 10               | 1  | 0 | 0  | 0 | 16.9%       |
| PS2          | Change in planned procedure                                                             | 11             | 37                | 6                | 5  | 0 | 0  | 0 | 29.7%       |

|      |                                                          |      |      |     |     |    |    |    |       |
|------|----------------------------------------------------------|------|------|-----|-----|----|----|----|-------|
| PL3  | Abrupt drop in Hb or Hct (>25%)                          | 10   | 65   | 9   | 1   | 0  | 0  | 0  | 15.4% |
| PM8  | Abrupt medication stop                                   | 10   | 52   | 8   | 2   | 0  | 0  | 0  | 19.2% |
| PL8  | Hypoglycaemia (<3mmol/l)                                 | 10   | 46   | 9   | 1   | 0  | 0  | 0  | 21.7% |
| PL9  | Drug level out of range                                  | 10   | 32   | 8   | 2   | 0  | 0  | 0  | 31.3% |
| PL6  | K <sup>+</sup> <3.0 or >6.0                              | 9    | 69   | 8   | 0   | 0  | 1  | 0  | 13.0% |
| IP1  | Readmission to ICU or HDU                                | 9    | 16   | 5   | 1   | 0  | 3  | 0  | 56.3% |
| PS4  | Removal/Injury or repair of organ                        | 9    | 43   | 3   | 5   | 1  | 0  | 0  | 20.9% |
| PG6  | Respiratory/Cardiac arrest/crash call                    | 9    | 41   | 0   | 2   | 0  | 7  | 0  | 22.0% |
| PM5  | Chlorpheniramine given                                   | 9    | 82   | 7   | 2   | 0  | 0  | 0  | 11.0% |
| PL2  | Transfusion                                              | 8    | 143  | 6   | 1   | 0  | 1  | 0  | 5.6%  |
| PL4  | Rising urea or creatinine (>2x baseline)                 | 6    | 54   | 4   | 2   | 0  | 0  | 0  | 11.1% |
| PL15 | Thrombocytopenia                                         | 6    | 54   | 4   | 1   | 0  | 0  | 1  | 11.1% |
| PL1  | High INR (>5) or APTT > 100 sec                          | 6    | 31   | 6   | 0   | 0  | 0  | 0  | 19.4% |
| PM4  | Glucagon or glucose ≥ 10% given                          | 6    | 50   | 6   | 0   | 0  | 0  | 0  | 12.0% |
| PG7  | Diagnostic imaging for embolus/thrombus +/- confirmation | 4    | 24   | 2   | 1   | 1  | 0  | 0  | 16.7% |
| PM2  | Naloxone given                                           | 4    | 16   | 3   | 0   | 0  | 1  | 0  | 25.0% |
| PL11 | <i>C Difficile</i>                                       | 4    | 12   | 3   | 1   | 0  | 0  | 0  | 33.3% |
| PM1  | Vitamin K given (except routine neonatal dose)           | 1    | 33   | 1   | 0   | 0  | 0  | 0  | 3.0%  |
| PM3  | Flumazaniil given                                        | 0    | 2    | 0   | 0   | 0  | 0  | 0  | N/A   |
| PL10 | MRSA bacteraemia                                         | 0    | 0    | 0   | 0   | 0  | 0  | 0  | N/A   |
| PL12 | Vancomycin resistant enterococcus                        | 0    | 0    | 0   | 0   | 0  | 0  | 0  | N/A   |
|      | <b>TOTAL</b>                                             | 1001 | 7199 | 605 | 318 | 18 | 43 | 17 |       |

**Table 4: Severity of Adverse Events**

| Grade*       | Descriptor                                                                       | Adverse Events | % of Total Adverse Events |
|--------------|----------------------------------------------------------------------------------|----------------|---------------------------|
| <b>E</b>     | <b>Temporary harm to the patient and required intervention</b>                   | <b>605</b>     | <b>60.4%</b>              |
| <b>F</b>     | <b>Temporary harm to the patient and required initial or prolonged admission</b> | <b>318</b>     | <b>31.8%</b>              |
| <b>G</b>     | <b>Permanent patient harm</b>                                                    | <b>18</b>      | <b>1.8%</b>               |
| <b>H</b>     | <b>Intervention required to sustain life</b>                                     | <b>43</b>      | <b>4.3%</b>               |
| <b>I</b>     | <b>Patient death</b>                                                             | <b>17</b>      | <b>1.7%</b>               |
| <b>Total</b> |                                                                                  | <b>1001</b>    |                           |

- National Coordinating Council for Medication Error Reporting and Prevention (NCC MERP) Index[23]

1  
2  
3  
4  
5  
6  
7  
8  
9  
10  
11  
12  
13  
14  
15  
16  
17  
18  
19  
20  
21  
22  
23  
24  
25  
26  
27  
28  
29  
30  
31  
32  
33  
34  
35  
36  
37  
38  
39  
40  
41  
42  
43  
44  
45  
46  
47  
48  
49

**Funding**

The data portal was hosted and funded by the NHS Institute for Innovation and Improvement. Data extraction was funded by NHS Institute for Innovation and Improvement.

**Contributorship Statement**

The authors contributed to the paper as outlined in the table below.

|   | <b>Author</b>   | <b>Contribution</b>                                                                                              |
|---|-----------------|------------------------------------------------------------------------------------------------------------------|
| 1 | Susan Chapman   | Development of paediatric trigger tool, study concept, data collection, data analysis and manuscript preparation |
| 2 | John Fitzsimons | Development of paediatric trigger tool, study concept, data analysis and manuscript preparation.                 |
| 3 | Nicola Davey    | Development of paediatric trigger tool, study concept, data collection, data analysis and manuscript revision    |
| 4 | Peter Lachman   | Development of paediatric trigger tool, Study concept, data analysis and manuscript revision                     |

**Competing Interests**

None

**Data Sharing**

There is no additional data available.



1  
2  
3  
4  
5 **Ethics**  
6

7 Contributing hospitals consented to their data being collated and published. Individual hospitals developed local administrative and governance  
8 arrangements for trigger tool reviews following the standard guidance.  
9  
10  
11  
12  
13  
14  
15  
16  
17  
18  
19  
20  
21  
22  
23  
24  
25  
26  
27  
28  
29  
30  
31  
32  
33  
34  
35  
36  
37  
38  
39  
40  
41  
42  
43  
44  
45  
46  
47  
48  
49

## REFERENCES

1. Resar RK, Rozich JD, Classen D. Methodology and rationale for the measurement of harm with trigger tools. *Qual Saf Health Care*. 2003;12 Suppl 2:ii39–45.
2. Beyea SC. Using trigger tools to enhance patient safety. *AORN J*. 2005;82(1):115–6.
3. Griffin FA, Resar RK. IHI Global Trigger Tool for measuring adverse events (Second Edition). IHI Innovation Series White Paper. Cambridge, MA: Institute for Healthcare Improvement. 2009.
4. Classen, D C. Resar RK. The Burden of Harm. *Joint Commission Journal on Quality and Patient Safety*. 2013;39(7) 291-291
5. Thomas EJ, Petersen LA. Measuring harm and adverse events in healthcare. *J of In Med*. 2003;18,61-67
6. Woods D, Thomas E, Holl J, et al. Adverse events and preventable adverse events in children. *Pediatrics*. 2005;115(1):155–60.
7. Review of patient safety for children and young people. National Patient Safety Agency 2009 <http://www.nrls.npsa.nhs.uk/resources/?entryid45=59864> Accessed Nov 2013
8. Report of the Mid Staffordshire NHS Foundation Trust public inquiry (Robert Francis, chair). Staffordshire, United Kingdom: Mid Staffordshire NHS Foundation Trust, February 2013.
9. Berwick report into patient safety. [www.gov.uk/government/uploads/system/uploads/attachment\\_data/file/226703/Berwick\\_Report.pdf](http://www.gov.uk/government/uploads/system/uploads/attachment_data/file/226703/Berwick_Report.pdf)

10. Sari ABA, Sheldon TA, Cracknell A, et al. Sensitivity of routine system for reporting patient safety incidents in an NHS hospital: retrospective patient case note review. *BMJ*. 2007;13;334(7584),79–9.
11. Tinoco A, Evans RS, Staes CJ, et al. Comparison of computerized surveillance and manual chart review for adverse events. *Journal of the American Medical Informatics Association*. 2011;18(4):491–7.
12. Beyea SC. Using trigger tools to enhance patient safety. *AORN J*. 2005;82(1):115–6.
13. Griffin FA, Classen DC. Detection of adverse events in surgical patients using the Trigger Tool approach. *Qual Saf Health Care*. 2008;17(4):253–8.
14. Resar RK, Rozich JD, Simmonds T, Haraden CR. A trigger tool to identify adverse events in the intensive care unit. *Jt Comm J Qual Patient Saf*. 2006;32(10):585–90.
15. Singh RN, McLean-Plunckett EA, Kee R, et al. Experience with a trigger tool for identifying adverse drug events among older adults in ambulatory primary care. *Qual Saf Health Care*. 2009;18(3):199–204.
16. Kirkendall ES, Kloppenborg E, Papp J, et al. Measuring Adverse Events and Levels of Harm in Pediatric Inpatients With the Global Trigger Tool. *Pediatrics*. 2012;130(5):e1206–14.
17. Sharek PJ, Horbar JD, Mason W, et al. Adverse events in the neonatal intensive care unit: development, testing, and findings of an NICU-focused trigger tool to identify harm in North American NICUs. *Pediatrics*. 2006;118(4):1332–40.
18. Larsen GY, Donaldson AE, Parker HB et al. Preventable harm occurring to critically ill children. *Pediatr Crit Care Med*. 2007;8(4):331–6.
19. Agarwal S, Classen D, Larsen G, et al. Prevalence of adverse events in pediatric intensive care units in the United States. *Pediatr Crit Care Med*. 2010; 11(5):568–78.
20. Takata GS, Mason W, Taketomo C, et al. Development, testing, and findings of a pediatric-focused trigger tool to identify medication-related harm in US children's hospitals. *Pediatrics*. 2008;121(4):e927–35.
21. Muething SE, Conway PH, Kloppenborg E, et al. Identifying causes of adverse events detected by an automated trigger tool through in-depth analysis. *BMJ Qual Saf*. 2010;19(5):435–9.

- 1  
2  
3  
4  
5 22. Matlow AG, Cronin CMG, Flintoft V, et al. Description of the development and validation of the Canadian Paediatric Trigger Tool. *BMJ Qual Saf*. 2011;20(5):416–23.  
6  
7  
8 23. <http://www.nccmerp.org/medErrorCatIndex.html>.  
9  
10 24. Carter M. Measuring harm levels with the Global Trigger Tool. *Clinical Risk*. 2010;16:122–6.  
11  
12 25. Matlow AG, Baker GR, Flintoft V, et al. Adverse events among children in Canadian hospitals: the Canadian Paediatric Adverse Events  
13 Study. *Canadian Medical Association Journal*. 2012;184(E709-E718).  
14  
15 26. Silas R, Tibballs J. Adverse events and comparison of systematic and voluntary reporting from a paediatric intensive care unit. *Qual Saf  
16 Health Care*. 2010;19(6):568–71.  
17  
18 27. Naessens JM, O'Byrne TJ, Johnson MG, et al. Measuring hospital adverse events: assessing inter-rater reliability and trigger performance of  
19 the Global Trigger Tool. *Int J Qual Health Care*. 2010;22(4):266–74.  
20  
21 28. Sharek PJ, Parry GJ, Goldmann D, et al. Performance Characteristics of a Methodology to Quantify Adverse Events over Time in  
22 Hospitalized Patients. *Health Serv Res*. 2010;46(2):654–78.  
23  
24 29. Zegers M, de Bruijne MC, Spreeuwenberg P, et al. Variation in the rates of adverse events between hospitals and hospital departments. *Int J  
25 Qual Health Care*. 2011;23(2):126–33.  
26  
27 30. Zegers M, de Bruijne MC, Wagner C, et al. The inter-rater agreement of retrospective assessments of adverse events does not improve with  
28 two reviewers per patient record. *J Clin Epidemiol*. 2010;63(1):94–102.  
29  
30 31. Woods DM, Holl JL, Shonkoff JP, et al. Child-specific risk factors and patient safety. *J Patient Saf*. 2005;1:17–22.  
31  
32 32. Incidence of harm to children due to 'failure to monitor'. *NHS Outcomes Framework 2012/13, Technical details of indicators*, section 5.6.  
33 Department of Health Gateway reference 16886.  
34  
35 33. Lemon V, Stockwell DC. Automated Detection of Adverse Events in Children. *Pediatr Clin North Am*. 2012;59(6):1269–78  
36  
37 34. Solberg, L.I., Mosser, G., McDonald, S. (1997) Three faces of Performance measurement. *Journal of Quality Improvement*. 23(3). p.135-47.  
38  
39  
40  
41  
42  
43  
44  
45  
46  
47  
48  
49

- 1  
2  
3  
4  
5 35. Landrigan, CP, Parry GJ, Bones, CB, Hackbarth AD, Goldmann, DA, Sharek PJ. Temporal Trends in Rates of Patient Harm Resulting from  
6 Medical Care. *N Engl J Med* 2010; 363:2124-2134.  
7  
8 36. Parry GJ, Cline, A, Goldmann DA. Deciphering Harm Measurement. *JAMA*. 2012;307(20):2155-2156.  
9  
10  
11  
12  
13  
14  
15  
16  
17  
18  
19  
20  
21  
22  
23  
24  
25  
26  
27  
28  
29  
30  
31  
32  
33  
34  
35  
36  
37  
38  
39  
40  
41  
42  
43  
44  
45  
46  
47  
48  
49

# BMJ Open

## Prevalence and severity of patient harm in a sample of UK hospitalised children detected by the Paediatric Trigger Tool.

|                                 |                                                                                                                                                                                                                                                                                                                                                                             |
|---------------------------------|-----------------------------------------------------------------------------------------------------------------------------------------------------------------------------------------------------------------------------------------------------------------------------------------------------------------------------------------------------------------------------|
| Journal:                        | <i>BMJ Open</i>                                                                                                                                                                                                                                                                                                                                                             |
| Manuscript ID:                  | bmjopen-2014-005066.R1                                                                                                                                                                                                                                                                                                                                                      |
| Article Type:                   | Research                                                                                                                                                                                                                                                                                                                                                                    |
| Date Submitted by the Author:   | 09-Jun-2014                                                                                                                                                                                                                                                                                                                                                                 |
| Complete List of Authors:       | Chapman, Susan; Great Ormond Street Hospital for Children Foundation NHS Trust, Paediatrics<br>Fitzsimons, John; Our Lady of Lourdes Hospital, ; Health Service Executive, Quality & Patient Safety Division<br>Davey, Nicola; NHS Institute for Innovation and Improvement,<br>Lachman, Peter; Great Ormond Street Hospital for Children Foundation NHS Trust, Paediatrics |
| <b>Primary Subject Heading</b>: | Paediatrics                                                                                                                                                                                                                                                                                                                                                                 |
| Secondary Subject Heading:      | Patient-centred medicine, Qualitative research, Epidemiology                                                                                                                                                                                                                                                                                                                |
| Keywords:                       | PAEDIATRICS, Quality in health care < HEALTH SERVICES ADMINISTRATION & MANAGEMENT, Risk management < HEALTH SERVICES ADMINISTRATION & MANAGEMENT                                                                                                                                                                                                                            |
|                                 |                                                                                                                                                                                                                                                                                                                                                                             |

SCHOLARONE™  
Manuscripts

Only

## Title Page

**Prevalence and severity of patient harm in a sample of UK hospitalised  
children detected by the Paediatric Trigger Tool.**

**Corresponding Author**

Dr. Peter Lachman  
Great Ormond Street Hospital for Children NHS Foundation Trust  
Great Ormond Street  
London WC1N 3JH

Phone: 079 76283534

Fax: 020 7762 6824

**Authors**

Susan M Chapman  
Great Ormond Street Hospital for Children NHS Foundation Trust  
Great Ormond Street  
London WC1N 3JH

Dr. John Fitzsimons  
Our Lady of Lourdes Hospital  
Drogheda  
Co. Louth, Ireland  
&  
Quality & Patient Safety Division  
Health Service Executive  
Ireland

Nicola Davey  
NHS Institute for Innovation and Improvement  
University of Warwick Science Park  
Millburn Hill Road  
Coventry CV4 7HS

**Keywords**

1. Patient safety
2. Paediatrics
3. Adverse events
4. Patient harm
5. Risk

Word count excluding tables and abstract = 3096

## Abstract

The measurement and examination of adverse events that occur to children during hospital admissions is essential if we are to prevent, reduce or ameliorate the harm experienced. The UK Paediatric Trigger Tool (UKPTT) is a method of retrospective case note review that measures harm in hospitalised children.

## Objectives

To examine the harm resulting from the processes of healthcare in hospitalised children from centres providing data to the NHS Institute UKPTT data portal, to understand the positive predictive values of triggers and to make recommendations for the further development of the trigger tool.

## Setting:

Twenty-five hospitals across the UK, including secondary, tertiary and quaternary paediatric centres.

## Participants:

Randomly selected children who were admitted to hospital for longer than 24hrs.

## Outcome measures:

The primary outcome measure was the rate of harm (the percentage of children experiencing one or more adverse event during a hospital admission). Secondary measures were the severity of harm and performance of triggers.

## Results

Data from 3992 patient admissions were reviewed across the hospitals and submitted to the trigger tool portal from February 2008 to November 2011. At





## Introduction

The provision of care that is safe and reliable is a fundamental goal of modern healthcare. Patient safety is the prevention, reduction and amelioration of medical harm.[1, 2] Medical harm (synonymous with the terms patient harm and adverse event, AE) is defined as unintended physical injury resulting from or contributed to by medical care that requires additional monitoring, treatment or hospitalisation, or that results in death.[3] Efforts to improve patient safety have been hampered by a lack of reliable data on the prevalence and nature of harm in all areas of practice. Patients and healthcare professionals need to understand the burden of harm in healthcare in order to develop effective interventions.[4]

## Development of Trigger Tool methodology

The Global Trigger Tool (GTT) for measuring harm was developed by the Institute for Healthcare Improvement (IHI) for use in adult care settings [3]. Triggers tools have also been developed for specific populations and settings, including acute hospitals, surgery,[5] critical care,[6] and primary care.[7] One study used the GTT to measure harm at a large academic children's hospital in the USA and recommended the development of a paediatric specific tool.[8] Paediatric specific trigger tools have been developed for neonatology,[9] paediatric critical care,[10,11] medications,[12, 13] and a general trigger tool for harm in hospitalised children,[14] A UK version of the acute adult GTT had already been developed but this was not applicable to a paediatric population. In 2008, the NHS Institute for Innovation and Improvement undertook to develop a

1 UK paediatric trigger tool that could be applied to all levels of acute paediatric  
2 care.  
3  
4  
5  
6  
7

### 8 **Trigger tool Method for reviewing case notes.**

9  
0  
1 The trigger tool method is a retrospective review of 20 sets of healthcare records  
2 each month, using a standardised methodology. A random sample of 20 in-  
3 patient case notes is selected using a randomisation matrix on a monthly basis.  
4  
5  
6  
7 The healthcare record is examined in a structured process for 20 minutes to  
8 search for “triggers”. A “trigger” is a predefined event that alerts the reviewer to  
9 the possibility of patient harm. Once a trigger is identified, the reviewer uses  
0 clinical expertise to examine the records in more detail to understand the  
1 circumstances around the event. If harm is suspected a second reviewer (usually  
2 a physician) is consulted to confirm and grade the adverse event using the NCC  
3 MERP grading system (Table 4).[15]  
4  
5

6  
7 An example of a trigger is the administration of the antidote medication naloxone  
8 (a trigger) to reverse the effects of opiates. This alerts the reviewer to a possible  
9 overdose of opioids. The reviewer examines the relevant parts of the healthcare  
0 record to assess whether the use of naloxone was for this reason or not. If this is  
1 the reason then the harm is graded.  
2  
3  
4  
5  
6  
7  
8  
9  
0  
1  
2  
3  
4  
5  
6  
7  
8  
9  
0

### 1 **Development of the UK PTT**

2 In 2008 the NHS Institute sponsored the development of a paediatric trigger tool  
3 because at the time there was no tool available for hospitalised children. The  
4 tools design was informed by the early (and pre-publication) findings of a  
5  
6  
7  
8  
9  
0

1  
2  
3  
4  
5  
6  
7  
8  
9  
0  
1  
2  
3  
4  
5  
6  
7  
8  
9  
0  
2  
2  
3  
2  
2  
2  
2  
2  
2  
2  
3  
3  
3  
3  
4  
5  
6  
7  
8  
9  
0  
4  
2  
3  
4  
5  
6  
7  
8  
9  
0  
5  
2  
3  
4  
5  
6  
7  
8  
9  
0

Canadian pediatric trigger tool study,[14] and the UK Acute Trigger Tool for adults.[16] The development was a co-production involving the collaboration of patient safety experts from the NHS Institute, international leaders in paediatric trigger tool development and clinical experts from nine UK hospitals including children's hospitals and district general hospitals. Following discussion and testing, the group agreed on 40 paediatric oriented triggers to be included in the UKPTT. These were based on the triggers used in other tools, UK evidence of adverse events and the experience of the reference group in harm and adverse events (a subset of the co-production group). Production of a UK tool was intended to enhance ownership by the clinicians, who would use it in practice and to modify triggers that were not appropriate for the UK setting. We also added a category for "other harm" to capture harm that was not detected by one of the listed triggers.

The UKPTT advocates a working definition of patient harm as "*anything, which you would not like to happen to yourself or a member of your family as a result of, or contributed to by, medical care*". The decision to aim for a broad definition was to focus on the patient rather than on the medical system – a less defensive approach. This is a broader definition than that given by Griffin et al[3] or the Canadian tool and aimed to encourage clinicians to explore a holistic concept of harm than that traditionally reported. It allows the inclusion of acts of omission as well as commission. The definition includes missed or delayed diagnosis along with physical and psychological harm.

1 Through the coproduction, support was developed for UK PTT users such as  
2 face-to-face training, online and printed guidance, and standardised data  
3 collection forms.  
4  
5  
6  
7  
8  
9

## 10 **Data Collection**

11 As part of the UKPTT development, the NHS Institute created a web-based  
12 trigger tool portal into which participating hospitals entered anonymised data.  
13 The portal calculated harm rates and produced run charts that hospitals could  
14 download. Contributing hospitals consented to their data being collated and  
15 published to further the understanding of harm in hospitalised children in the UK.  
16 Participating hospitals developed local administrative and governance  
17 arrangements for PTT reviews following the standard guidance.  
18  
19  
20  
21  
22  
23  
24  
25  
26  
27  
28  
29  
30

## 31 **Aims and methodology**

32 The aims of this study are to:

- 33 1. Describe the rate and severity of harm occurring in hospitalised children from  
34 UK centres submitting data to the NHS Institute's Trigger Tool portal.
- 35 2. Report the frequency and positive predictive value (PPV) of triggers to detect  
36 harm.
- 37 3. Make recommendations for further application and development of the tool.

38 Participating hospitals, which voluntarily decided to use the PTT, included  
39 secondary, tertiary and quaternary centers. Reviewers were trained in trigger tool  
40 methodology either by experts at the NHS Institute or by using on-line resources  
41 with telephone support. Data was collected through the on-line trigger tool portal  
42 that opened in Feb 2008.  
43  
44  
45  
46  
47  
48  
49  
50

## Results

Data from 3992 case note reviews from 25 hospitals submitted to the trigger tool portal between February 2008 and November 2011 were analysed. Nine of the hospitals were children's hospitals; the remainder was classed as district general hospitals. Data from four additional hospitals that used the portal were excluded because they each submitted less than 10 case entries. Harm was recorded as occurring for 567 patients (14.2%) while the majority (85.8%) of patients experienced no evidence of harm. Reviewers identified 1001 adverse events, an average of 1.8 events per patient experiencing harm.

There was considerable variation between hospitals in the number of case notes reviewed (12 – 622), the number of triggers detected (17 – 1877) and overall harm rate reported (0% - 73.3%). Results from each hospital are reported in Table 1. Of the 567 children who suffered an AE, the majority (n=356, 63%) experienced a single event. However 211 (37%) of patients suffered more than one AE within the same admission. One patient was reported to have suffered 10 AEs in a single admission. A summary of the number of adverse events per case is presented in Table 2.

Individual triggers varied in their ability to lead to detection of harm. The trigger *Complications of procedure or treatment* yielded the greatest amount of harm (182 AEs). The PPV varied from 80.0% for *surgical site infection* to 2.62% for *missing observations/early warning scores*. The PPV was generally low in frequently identified triggers, such as *missing observations/early warning scores*

1 (PPV 2.6%) and *unplanned admission* (PPV 4.0%). The positive triggers,  
2  
3  
4  
5  
6  
7  
8  
9  
10  
11  
12  
13  
14  
15  
16  
17  
18  
19  
20  
21  
22  
23  
24  
25  
26  
27  
28  
29  
30  
31  
32  
33  
34  
35  
36  
37  
38  
39  
40  
41  
42  
43  
44  
45  
46  
47  
48  
49  
50  
51  
52  
53  
54  
55  
56  
57  
58  
59  
60

adverse events and PPV for each trigger are displayed in Table 3.

The majority of adverse events (n=923, 92.2%) resulted in temporary harm to the patient (grade E and F – see Table 5[15]), 43 AEs required life-sustaining interventions and 18 resulted in permanent harm. In 17 cases, the adverse event was believed to have contributed to the child's death (Table 4).

## Discussion

The complexity of uncovering harm is reflected in the numerous ways that one has to measure it.[17] Traditional methods such as incident reporting have limitations, especially that of underreporting, due to the reliance on individual clinicians to recognise and report adverse events, as well as a tendency to focus on error, rather than harm. The measurement and examination of harm, rather than that of error, recognises that efforts to improve patient safety benefit from focusing on incidents that result in actual harm, identifying high risk situations, considering preventability and looking for means of early detection and harm limitation.[18] This deeper understanding of the harm to which patients are exposed is a recent phenomenon and in paediatrics the potential risks to safety are multiple.[19] The call for Zero Harm and the focus on safety in recent reports,[20, 21] reflects the importance of the identification and understanding of harm as an essential part of patients care. Clinicians have not known the actual levels of harm caused and have relied on a reporting system for clinical incidents.







1 hospitals uploading low volumes of reviews and may be interpreted as the  
2 relative inexperience of the reviewers.[29] There is also a wide variety across the  
3 level of hospital represented with the corresponding impact on risk due to patient  
4 complexity, need for surgery or critical care and length of stay. Whilst we had no  
5 means of adjusting for acuity because of the random selection of notes from  
6 within hospitals we believe that the overall group is broadly representative of the  
7 population of hospitalised children in the UK.

8 One could ask whether this level of variation diminishes the findings of the study.  
9 On the contrary, we believe it represents a real portrayal of complex issues. It is  
0 also a taste of what individual organisations can expect if they start to use the  
1 PTT to help understand and reduce the harm in their institution. They will need to  
2 consider all of these issues as they interpret their own findings.

3 The majority (92.3%) of AEs identified in this study represented temporary harm  
4 resulting in the child either requiring an intervention, admission to hospital or  
5 prolongation of their hospital stay. Whilst severe harm (permanent harm or harm  
6 that requiring life sustaining measures or contributed to death) was rare, it still  
7 constituted 7.8% of harm identified. Similar findings with respect to severity have  
8 been reported with 10% of AEs classified as severe in one study of harm in  
9 PICU.[10] A study of AEs in hospitalised children reported that clinicians do not  
0 always recognize harm, even when the consequences to the child are  
1 severe.[30] In this study multiple AE were relatively common, with 37% of those  
2 experiencing harm suffering two or more AE in the same admission, far higher  
3 than previous studies.[8,25]







PTT does not replace other reporting mechanisms, but is a useful addition to the methods already used to understand the harm caused to children in hospital care. Harm needs to be detected and assessed through a number of lenses and this lens allows clinicians to further understand what they do and how harm impacts on children. It provides a way to move from a reactive approach to safety to one that is more proactive and founded in harm free care.

*Susan Chapman and John Fitzsimons are joint first authors*

The tool and guidance for its use is available from the corresponding author, Peter Lachman.

For peer review only

**Acknowledgement:**

The authors would like to thank Matt Tite at the NHS Institute for Innovation and Improvement for extracting and processing the data.

The authors would also like to thank all the participating institutions whose unidentifiable data has been made available for the analysis, and those who participated in the development of the UKPTT.

**Contributorship Statement:**

Susan Chapman Development of paediatric trigger tool, study concept, data collection, data analysis and manuscript preparation

John Fitzsimons Development of paediatric trigger tool, study concept, data analysis and manuscript preparation.

Nicola Davey Development of paediatric trigger tool, study concept, data collection, data analysis and manuscript revision

Peter Lachman Development of paediatric trigger tool, Study concept, data analysis and manuscript revision

**Competing Interest:**

None known.

**Data Sharing Statement**

No additional data available

Table 1: Number of case reviews, positive triggers and adverse events by individual hospital

| Hospital | Case notes reviewed | Positive triggers | Average number of triggers per case note review | Adverse events | Average number of AE per case note review | Number of individual patients harmed (%) |
|----------|---------------------|-------------------|-------------------------------------------------|----------------|-------------------------------------------|------------------------------------------|
| A        | 622                 | 1877              | 3.02                                            | 309            | 0.50                                      | 162 (26%)                                |
| B        | 369                 | 579               | 1.57                                            | 66             | 0.18                                      | 31 (8%)                                  |
| C        | 321                 | 415               | 1.29                                            | 60             | 0.19                                      | 37 (11.5%)                               |
| D        | 309                 | 481               | 1.56                                            | 117            | 0.38                                      | 49 (15.9%)                               |
| E        | 285                 | 414               | 1.45                                            | 84             | 0.29                                      | 43 (15.1%)                               |
| F        | 271                 | 454               | 1.68                                            | 112            | 0.41                                      | 54 (20%)                                 |
| G        | 260                 | 484               | 1.86                                            | 48             | 0.18                                      | 39 (15%)                                 |
| H        | 241                 | 418               | 1.73                                            | 6              | 0.02                                      | 4 (1.7%)                                 |
| I        | 195                 | 432               | 2.22                                            | 14             | 0.07                                      | 14 (7.2%)                                |
| J        | 195                 | 52                | 0.27                                            | 3              | 0.02                                      | 3 (1.5%)                                 |
| K        | 190                 | 446               | 2.35                                            | 45             | 0.24                                      | 40 (21%)                                 |
| L        | 124                 | 173               | 1.40                                            | 17             | 0.14                                      | 15 (12.1%)                               |
| M        | 71                  | 52                | 0.73                                            | 0              | 0.00                                      | 0 (0%)                                   |
| N        | 70                  | 171               | 2.44                                            | 8              | 0.11                                      | 7 (10%)                                  |
| O        | 68                  | 141               | 2.07                                            | 8              | 0.12                                      | 7 (10.3%)                                |
| P        | 68                  | 107               | 1.57                                            | 1              | 0.01                                      | 1 (1.5%)                                 |
| Q        | 66                  | 79                | 1.20                                            | 15             | 0.23                                      | 11 (16.7%)                               |
| R        | 62                  | 84                | 1.35                                            | 15             | 0.24                                      | 12 (19.3%)                               |
| S        | 60                  | 121               | 2.02                                            | 32             | 0.53                                      | 15 (25%)                                 |
| T        | 59                  | 90                | 1.53                                            | 2              | 0.03                                      | 1 (1.7%)                                 |
| U        | 23                  | 22                | 0.96                                            | 4              | 0.17                                      | 3 (13%)                                  |
| V        | 19                  | 14                | 0.74                                            | 1              | 0.05                                      | 1 (5.2%)                                 |
| W        | 17                  | 26                | 1.53                                            | 4              | 0.24                                      | 4 (23.5%)                                |
| X        | 15                  | 50                | 3.33                                            | 27             | 1.80                                      | 11 (73.3%)                               |
| Y        | 12                  | 17                | 1.42                                            | 3              | 0.25                                      | 3 (25%)                                  |
| Overall  | 3992                | 7199              | 1.65                                            | 1001           | 0.26                                      | 567 (14.2%)                              |



**Table 2: Number of adverse events per patient**

| Number of AE per case | Number of Patients (n= 3992) | % of patient who suffered harm (n=567) |
|-----------------------|------------------------------|----------------------------------------|
| 0                     | 3425                         | N/A                                    |
| 1                     | 356                          | 62.8%                                  |
| 2                     | 111                          | 19.6%                                  |
| 3                     | 40                           | 7.0%                                   |
| 4                     | 28                           | 4.9%                                   |
| 5                     | 16                           | 2.8%                                   |
| 6                     | 8                            | 1.4%                                   |
| 7                     | 5                            | 0.9%                                   |
| 9                     | 2                            | 0.4%                                   |
| 10                    | 1                            | 0.2%                                   |

Table 3: Trigger descriptors, AE and positive predictive value

| Trigger Code | Trigger description                                                                     | Adverse events | Positive Triggers | Severity of harm |    |   |    |   | Trigger PPV |
|--------------|-----------------------------------------------------------------------------------------|----------------|-------------------|------------------|----|---|----|---|-------------|
|              |                                                                                         |                |                   | E                | F  | G | H  | I |             |
| PG8          | Complication of procedure or treatment                                                  | 182            | 257               | 99               | 63 | 6 | 11 | 3 | 70.8%       |
| PG3          | Readmission to hospital within 30 days                                                  | 107            | 462               | 36               | 68 | 0 | 1  | 2 | 23.2%       |
| PG2          | Tissue damage or pressure ulcer                                                         | 81             | 250               | 66               | 12 | 0 | 1  | 2 | 32.4%       |
| PG4          | Unplanned admission                                                                     | 68             | 1668              | 23               | 41 | 0 | 3  | 1 | 4.1%        |
| PO1          | Other (specify)                                                                         | 60             | 425               | 48               | 10 | 0 | 1  | 1 | 14.1%       |
| PS3          | Surgical site infection                                                                 | 48             | 60                | 24               | 22 | 0 | 1  | 1 | 80.0%       |
| PM5          | Anti-emetic given                                                                       | 41             | 507               | 40               | 1  | 0 | 0  | 0 | 8.1%        |
| PG10         | Hypoxia O <sub>2</sub> sat <85%                                                         | 36             | 157               | 31               | 2  | 3 | 0  | 0 | 22.9%       |
| PG1          | EWS or baseline observations missing/incomplete or score/observation requiring response | 35             | 1362              | 26               | 8  | 0 | 1  | 0 | 2.6%        |
| PG9          | Transfer to higher level of care (inc admission to specialist unit, ICU/HDU)            | 35             | 273               | 15               | 14 | 0 | 5  | 1 | 12.8%       |
| PS1          | Return to theatre                                                                       | 33             | 75                | 15               | 15 | 2 | 1  |   | 44.0%       |
| PM7          | IV Bolus ≥ 10ml/kg colloid or crystalloid given                                         | 31             | 386               | 22               | 5  | 1 | 1  | 2 | 8.0%        |
| PG11         | Cancelled elective procedure/ delayed discharge                                         | 24             | 55                | 10               | 12 | 1 | 0  | 1 | 43.6%       |
| PL14         | Positive blood culture                                                                  | 23             | 55                | 18               | 4  | 0 | 1  | 0 | 41.8%       |
| PL13         | Nosocomial Pneumonia                                                                    | 21             | 28                | 8                | 10 | 0 | 2  | 1 | 75.0%       |
| PL5          | Na <sup>+</sup> <130 or >150                                                            | 14             | 71                | 12               | 1  | 0 | 1  | 0 | 19.7%       |
| PG5          | Cranial Imaging                                                                         | 10             | 141               | 4                | 2  | 3 | 0  | 1 | 7.0%        |
| PL8          | Hyperglycaemia (>12mmol/l)                                                              | 11             | 65                | 10               | 1  | 0 | 0  | 0 | 16.9%       |
| PS2          | Change in planned procedure                                                             | 11             | 37                | 6                | 5  | 0 | 0  | 0 | 29.7%       |

|      |                                                          |      |      |     |     |    |    |    |       |
|------|----------------------------------------------------------|------|------|-----|-----|----|----|----|-------|
| PL3  | Abrupt drop in Hb or Hct (>25%)                          | 10   | 65   | 9   | 1   | 0  | 0  | 0  | 15.4% |
| PM8  | Abrupt medication stop                                   | 10   | 52   | 8   | 2   | 0  | 0  | 0  | 19.2% |
| PL8  | Hypoglycaemia (<3mmol/l)                                 | 10   | 46   | 9   | 1   | 0  | 0  | 0  | 21.7% |
| PL9  | Drug level out of range                                  | 10   | 32   | 8   | 2   | 0  | 0  | 0  | 31.3% |
| PL6  | K <sup>+</sup> <3.0 or >6.0                              | 9    | 69   | 8   | 0   | 0  | 1  | 0  | 13.0% |
| IP1  | Readmission to ICU or HDU                                | 9    | 16   | 5   | 1   | 0  | 3  | 0  | 56.3% |
| PS4  | Removal/Injury or repair of organ                        | 9    | 43   | 3   | 5   | 1  | 0  | 0  | 20.9% |
| PG6  | Respiratory/Cardiac arrest/crash call                    | 9    | 41   | 0   | 2   | 0  | 7  | 0  | 22.0% |
| PM5  | Chlorpheniramine given                                   | 9    | 82   | 7   | 2   | 0  | 0  | 0  | 11.0% |
| PL2  | Transfusion                                              | 8    | 143  | 6   | 1   | 0  | 1  | 0  | 5.6%  |
| PL4  | Rising urea or creatinine (>2x baseline)                 | 6    | 54   | 4   | 2   | 0  | 0  | 0  | 11.1% |
| PL15 | Thrombocytopenia                                         | 6    | 54   | 4   | 1   | 0  | 0  | 1  | 11.1% |
| PL1  | High INR (>5) or APTT > 100 sec                          | 6    | 31   | 6   | 0   | 0  | 0  | 0  | 19.4% |
| PM4  | Glucagon or glucose ≥ 10% given                          | 6    | 50   | 6   | 0   | 0  | 0  | 0  | 12.0% |
| PG7  | Diagnostic imaging for embolus/thrombus +/- confirmation | 4    | 24   | 2   | 1   | 1  | 0  | 0  | 16.7% |
| PM2  | Naloxone given                                           | 4    | 16   | 3   | 0   | 0  | 1  | 0  | 25.0% |
| PL11 | <i>C Difficile</i>                                       | 4    | 12   | 3   | 1   | 0  | 0  | 0  | 33.3% |
| PM1  | Vitamin K given (except routine neonatal dose)           | 1    | 33   | 1   | 0   | 0  | 0  | 0  | 3.0%  |
| PM3  | Flumazaniil given                                        | 0    | 2    | 0   | 0   | 0  | 0  | 0  | N/A   |
| PL10 | MRSA bacteraemia                                         | 0    | 0    | 0   | 0   | 0  | 0  | 0  | N/A   |
| PL12 | Vancomycin resistant enterococcus                        | 0    | 0    | 0   | 0   | 0  | 0  | 0  | N/A   |
|      | <b>TOTAL</b>                                             | 1001 | 7199 | 605 | 318 | 18 | 43 | 17 |       |

**Table 4: Severity of Adverse Events**

| Grade*       | Descriptor                                                                       | Adverse Events | % of Total Adverse Events |
|--------------|----------------------------------------------------------------------------------|----------------|---------------------------|
| <b>E</b>     | <b>Temporary harm to the patient and required intervention</b>                   | <b>605</b>     | <b>60.4%</b>              |
| <b>F</b>     | <b>Temporary harm to the patient and required initial or prolonged admission</b> | <b>318</b>     | <b>31.8%</b>              |
| <b>G</b>     | <b>Permanent patient harm</b>                                                    | <b>18</b>      | <b>1.8%</b>               |
| <b>H</b>     | <b>Intervention required to sustain life</b>                                     | <b>43</b>      | <b>4.3%</b>               |
| <b>I</b>     | <b>Patient death</b>                                                             | <b>17</b>      | <b>1.7%</b>               |
| <b>Total</b> |                                                                                  | <b>1001</b>    |                           |

- National Coordinating Council for Medication Error Reporting and Prevention (NCC MERP) Index[23]

## REFERENCES

1. Resar RK, Rozich JD, Classen D. Methodology and rationale for the measurement of harm with trigger tools. *Qual Saf Health Care*. 2003;12 Suppl 2:ii39–45.
2. Beyea SC. Using trigger tools to enhance patient safety. *AORN J*. 2005;82(1):115–6.
3. Griffin FA, Resar RK. IHI Global Trigger Tool for measuring adverse events (Second Edition). IHI Innovation Series white paper. Cambridge, MA: Institute for Healthcare Improvement. 2009.
4. Classen, D C. Resar RK. The Burden of Harm. *Joint Commission Journal on Quality and Patient Safety*. 2013;39(7):291-291
5. Griffin FA, Classen DC. Detection of adverse events in surgical patients using the Trigger Tool approach. *Qual Saf Health Care*. 2008;17(4):253–8.
6. Resar RK, Rozich JD, Simmonds T, et al. A trigger tool to identify adverse events in the intensive care unit. *Jt Comm J Qual Patient Saf*. 2006;32(10):585–90.
7. Singh RN, McLean-Plunckett EA, Kee R, et al. Experience with a trigger tool for identifying adverse drug events among older adults in ambulatory primary care. *Qual Saf Health Care*. 2009;18(3):199–204.
8. Kirkendall ES, Kloppenborg E, Papp J, et al. Measuring Adverse Events and Levels of Harm in Pediatric Inpatients With the Global Trigger Tool. *Pediatrics*. 2012;130(5):e1206–14.
9. Sharek PJ, Horbar JD, Mason W, et al. Adverse events in the neonatal intensive care unit: development, testing, and findings of an NICU-focused trigger tool to identify harm in North American NICUs. *Pediatrics*. 2006;118(4):1332–40.
10. Larsen GY, Donaldson AE, Parker HB et al. Preventable harm occurring to critically ill children. *Pediatr Crit Care Med*. 2007;8(4):331–6.
11. Agarwal S, Classen D, Larsen G, et al. Prevalence of adverse events in pediatric intensive care units in the United States. *Pediatr Crit Care Med*. 2010; 11(5):568–78.

12. Takata GS, Mason W, Taketomo C, et al. Development, testing, and findings of a pediatric-focused trigger tool to identify medication-related harm in US children's hospitals. *Pediatrics*. 2008;121(4):e927–35.
13. Muething SE, Conway PH, Kloppenborg E, et al. Identifying causes of adverse events detected by an automated trigger tool through in-depth analysis. *BMJ Qual Saf*. 2010;19(5):435–9.
14. Matlow AG, Cronin CMG, Flintoft V, et al. Description of the development and validation of the Canadian Paediatric Trigger Tool. *BMJ Qual Saf*. 2011;20(5):416–23.
15. <http://www.nccmerp.org/medErrorCatIndex.html>. (accessed 25 May 2014)
16. Carter M. Measuring harm levels with the Global Trigger Tool. *Clinical Risk*. 2010;16:122–126.
17. Thomas EJ, Petersen LA. Measuring harm and adverse events in healthcare. *J of In Med*. 2003;18:61-67
18. Woods D, Thomas E, Holl J, et al. Adverse events and preventable adverse events in children. *Pediatrics*. 2005;115(1):155–60.
19. Review of patient safety for children and young people. National Patient Safety Agency 2009  
<http://www.nrls.npsa.nhs.uk/resources/?entryid45=59864> (accessed 25 May 2014)
20. Mid Staffordshire NHS Foundation Trust Public Inquiry. Report of the Mid Staffordshire NHS Foundation Trust Public Enquiry Feb 2013.  
<http://www.midstaffpublicinquiry.com/report>. (accessed 25 May 2014)
21. National Advisory Group on the Safety of Patients in England. A Promise to Learn a Commitment to Act-Improving the safety of patients in England. 2013. [https://www.gov.uk/government/uploads/system/uploads/attachment\\_data/file/226703/Berwick\\_Report.pdf](https://www.gov.uk/government/uploads/system/uploads/attachment_data/file/226703/Berwick_Report.pdf) (accessed 25 May 2014).
22. Sari ABA, Sheldon TA, Cracknell A, et al. Sensitivity of routine system for reporting patient safety incidents in an NHS hospital: retrospective patient case note review. *BMJ*. 2007;13;334(7584):79..
23. Tinoco A, Evans RS, Staes CJ, et al. Comparison of computerized surveillance and manual chart review for adverse events. *Journal of the American Medical Informatics Association*. 2011;18(4):491–7.
24. Silas R, Tibballs J. Adverse events and comparison of systematic and voluntary reporting from a paediatric intensive care unit. *Qual Saf*

- 1  
2  
3  
4  
5 Health Care. 2010;19(6):568–71.  
6  
7 25. Matlow AG, Baker GR, Flintoft V, et al. Adverse events among children in Canadian hospitals: the Canadian Paediatric Adverse Events  
8 Study. Canadian Medical Association Journal. 2012;184(E709-E718).  
9  
0 26. Naessens JM, O'Byrne TJ, Johnson MG, et al. Measuring hospital adverse events: assessing inter-rater reliability and trigger performance of  
1 the Global Trigger Tool. Int J Qual Health Care. 2010;22(4):266–74.  
2  
3 27. Sharek PJ, Parry GJ, Goldmann D, et al. Performance Characteristics of a Methodology to Quantify Adverse Events over Time in  
4 Hospitalized Patients. Health Serv Res. 2011;46(2):654–78.  
5  
6 28. Zegers M, de Bruijne MC, Spreeuwenberg P, et al. Variation in the rates of adverse events between hospitals and hospital departments. Int J  
7 Qual Health Care. 2011;23(2):126–33.  
8  
9 29. Zegers M, de Bruijne MC, Wagner C, et al. The inter-rater agreement of retrospective assessments of adverse events does not improve with  
0 two reviewers per patient record. J Clin Epidemiol. 2010;63(1):94–102.  
1  
2 30. Woods DM, Holl JL, Shonkoff JP, et al. Child-specific risk factors and patient safety. J Patient Saf. 2005;1:17–22.  
3  
4 31. *NHS Outcomes Framework 2012/13, Technical details of indicators*,. 2011: Section5.6:92  
5 .[https://www.gov.uk/government/uploads/system/uploads/attachment\\_data/file/213713/dh\\_131721.pdf](https://www.gov.uk/government/uploads/system/uploads/attachment_data/file/213713/dh_131721.pdf) (accessed 25 May 2014)  
6  
7 32. Lemon V, Stockwell DC. Automated Detection of Adverse Events in Children. Pediatr Clin North Am. 2012;59(6):1269–78.  
8  
9 33. Solberg, LI, Mosser, G, McDonald, S. Three faces of Performance measurement. Journal of Quality Improvement. 1997;23(3):135-47.  
0  
1 34. Landrigan, CP, Parry GJ, Bones, CB, et al. Temporal Trends in Rates of Patient Harm Resulting from Medical Care. N Engl J Med  
2 2010;363:2124-2134.  
3  
4 35. Parry GJ, Cline, A, Goldmann DA. Deciphering Harm Measurement. JAMA. 2012;307(20):2155-2156.  
5  
6  
7  
8  
9  
0  
1  
2  
3  
4  
5  
6  
7  
8  
9  
0

**Title Page**

Style Definition: Normal

**Prevalence and severity of patient harm in a sample of UK hospitalised children detected by the Paediatric Trigger Tool.**

Formatted: Font: Arial

**Corresponding Author**

Dr. John Fitzsimons  
Our Lady of Lourdes Hospital  
Drogheda  
Co Louth  
Ireland  
00353 87 9229942  
00353 41 987 5212

**Authors**

Susan M Chapman  
Great Ormond Street Hospital for Children NHS Foundation Trust  
Great Ormond Street  
London WC1N 3JH

Nicola Davey  
NHS Institute for Innovation and Improvement  
University of Warwick Science Park  
Millburn Hill Road  
Coventry CV4 7HS

Peter Lachman  
Great Ormond Street Hospital for Children NHS Foundation Trust  
Great Ormond Street  
London WC1N 3JH

**Keywords**

1. Patient safety
2. Paediatrics
3. Adverse events
4. Patient harm
5. Risk

Word count excluding tables and abstract = 3131



1  
2  
3  
4  
5  
6  
7  
8  
9  
0  
1  
2  
3  
4  
5  
6  
7  
8  
9  
0  
1  
2  
3  
4  
5  
6  
7  
8  
9  
0  
1  
2  
3  
4  
5  
6  
7  
8  
9  
0  
1  
2  
3  
4  
5  
6  
7  
8  
9  
0

**Prevalence and severity of patient harm in a sample of UK hospitalised children detected by the Paediatric Trigger Tool.**

**Words 3365**

For peer review only  
DRAFT

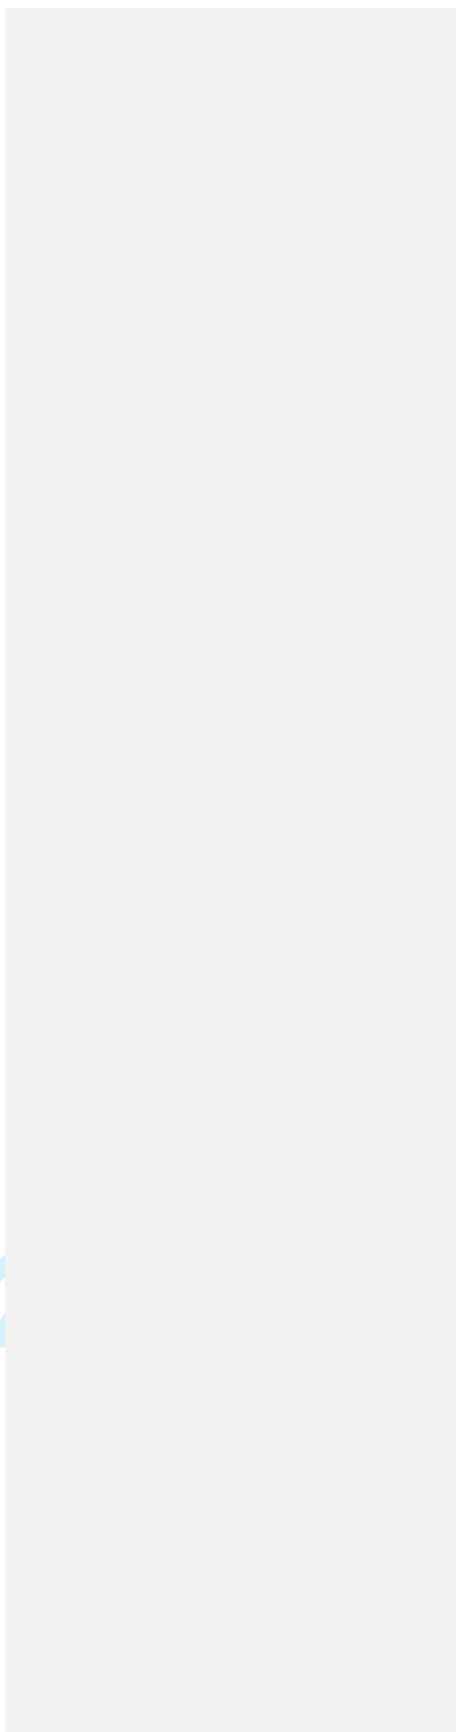

## Abstract

Patient safety is ~~the~~ now a key priority of health care. The measurement and examination of adverse events that occur to children during hospital admissions is essential if we are to prevent, reduce or ameliorate the harm experienced. The UK Paediatric Trigger Tool (UKPTT) is a method for measuring of retrospective case note review that measures harm in hospitalised children.

## Objectives

To examine the rate and nature of harm in hospitalised children from centres providing data to the NHS Institute UKPTT data portal, to understand the positive predictive values of triggers, and to make recommendations for the use and further development of the trigger tool.

## Results

Data from 3992 patient admissions were reviewed from 25 hospitals and submitted to the trigger tool portal from February 2008 to November 2011. The hospitals included secondary, tertiary and quaternary centers. At least one adverse event (AE) was reported for 567 (14.2%) patients, with 211 (5.3%) experiencing more than one event. There were 1001 adverse events identified. Where harm occurred it was considered temporary for 923 (92.2%) AEs, however 43 (4.3%) AEs resulted in the need for life-sustaining interventions, 18 (1.8%) AEs led to permanent harm and for 17 children (1.7% of AEs) the AE was believed to have contributed to death. The positive predictive values (PPV) for the triggers ranged from 0 to 80%.

1  
2  
3  
4  
5  
6  
7  
8  
9  
0  
1  
2  
3  
4  
5  
6  
7  
8  
9  
0  
1  
2  
3  
4  
5  
6  
7  
8  
9  
0  
1  
2  
3  
4  
5  
6  
7  
8  
9  
0  
1  
2  
3  
4  
5  
6  
7  
8  
9  
0  
1  
2  
3  
4  
5  
6  
7  
8  
9  
0

**Conclusions**

There is a significant, measurable level of harm experienced by children admitted to hospitals in the UK. While most of this harm is temporary, some is serious. The UKPTT offers organisations the means to measure and examine the adverse events occurring in their hospital in order to reduce harm.

DRAFT  
For peer review only

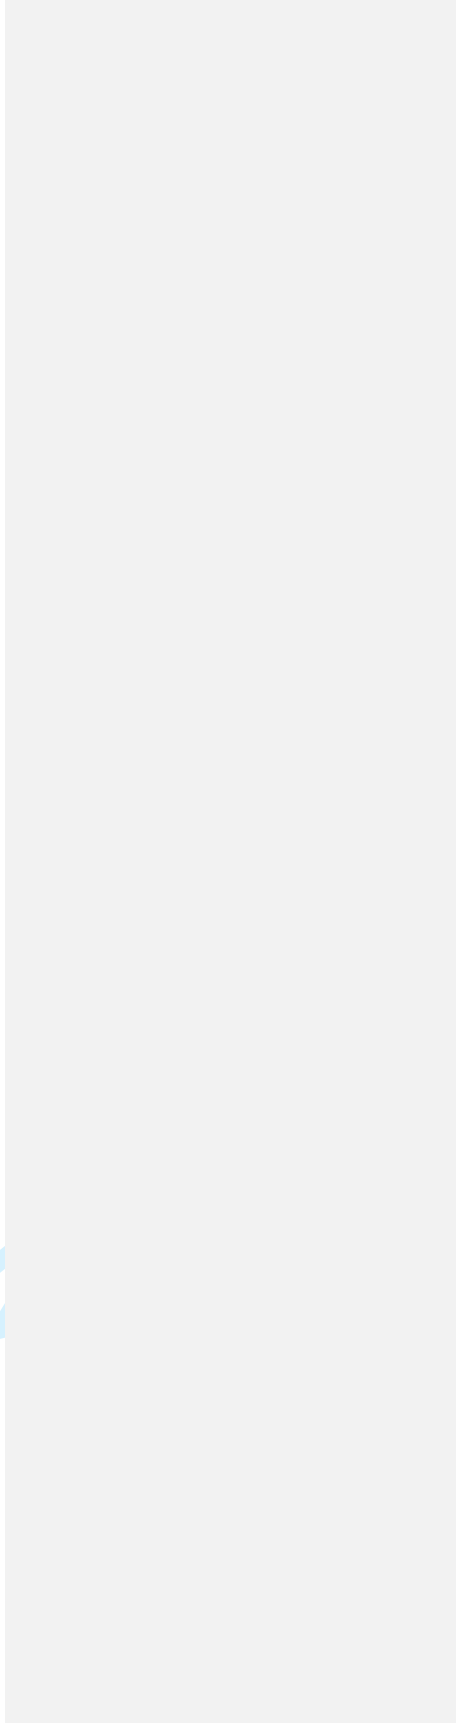

### Strengths:

- This study estimates that 1 in 7 children experience harm during admission to hospital in the UK. Most of this harm is temporary but a significant minority is serious. This should generate discussion about patient safety in paediatrics.
- The study used the UK Paediatric Trigger Tool that can be used by any hospital to learn about harm in order to prevent or reduce it.

### Limitations

- The study does not distinguish between preventable and non-preventable harm however we believe there is an opportunity to learn from any harm event.

### **Introduction**

~~Providing~~ The provision of care that is safe and reliable ~~are~~ is a fundamental ~~goals~~ goal of modern healthcare. Patient safety is the prevention, reduction and amelioration of medical harm-~~[1, 2]~~ Medical harm (synonymous with the terms patient harm and adverse event, AE) is defined as unintended physical injury resulting from or contributed to by medical care that requires additional monitoring, treatment or hospitalisation, or that results in death-~~[3]~~. Efforts to improve patient safety have been hampered by a lack of reliable data on the

Formatted: Justified

prevalence and nature of harm in all areas of practice. Patients and healthcare ~~professional~~professionals need to understand the burden of harm in healthcare in order to develop effective interventions[4].

~~The complexity of uncovering harm is reflected in the numerous ways that one has to measure it [5]. Traditional methods such as incident reporting, have limitations, especially that of underreporting, due to the reliance on individual clinicians to recognise and report adverse events, as well as a tendency to focus on error, rather than harm. The measurement and examination of harm, rather than that of error, recognises that efforts to improve patient safety benefit from focusing on incidents that result in actual harm, identifying high risk situations, considering preventability and looking for means of early detection and harm limitation[6]. This deeper understanding of the harm to which patients are exposed is a recent phenomenon and in paediatrics the potential risks to safety are multiple [7]. The call for Zero Harm and the focus on safety in recent reports [8,9], reflects the importance of the identification and understanding of harm as an essential part of patients care.~~

#### Development of Trigger Tool methodology

~~The Global Trigger Tool (GTT) for measuring harm~~Clinicians have not known the actual levels of harm caused and have relied on a reporting system for clinical incidents. ~~In this paper we assess the introduction of the UK Paediatric Trigger Tool, which aims to provide clinicians with a methodology to detect of harm and facilitates the development of interventions to decrease identified harm and provide safer care.~~









1  
2  
3  
4  
5  
6  
7 who would use it. ~~The Canadian tool had not been published in practice and no~~  
8 ~~to modify triggers that were not appropriate for the UK setting. We also added a~~  
9 ~~category for “other paediatric trigger tools were availableharm” to capture harm~~  
10 ~~that was not detected by one of the listed triggers.~~

11  
12  
13  
14  
15  
16  
17  
18  
19  
20  
21  
22  
23  
24  
25  
26  
27  
28  
29  
30  
31  
32  
33  
34  
35  
36  
37  
38  
39  
40  
41  
42  
43  
44  
45  
46  
47  
48  
49  
50  
51  
52  
53  
54  
55  
56  
57  
58  
59  
60  
61  
62  
63  
64  
65  
66  
67  
68  
69  
70  
71  
72  
73  
74  
75  
76  
77  
78  
79  
80  
81  
82  
83  
84  
85  
86  
87  
88  
89  
90  
91  
92  
93  
94  
95  
96  
97  
98  
99  
100  
101  
102  
103  
104  
105  
106  
107  
108  
109  
110  
111  
112  
113  
114  
115  
116  
117  
118  
119  
120  
121  
122  
123  
124  
125  
126  
127  
128  
129  
130  
131  
132  
133  
134  
135  
136  
137  
138  
139  
140  
141  
142  
143  
144  
145  
146  
147  
148  
149  
150  
151  
152  
153  
154  
155  
156  
157  
158  
159  
160  
161  
162  
163  
164  
165  
166  
167  
168  
169  
170  
171  
172  
173  
174  
175  
176  
177  
178  
179  
180  
181  
182  
183  
184  
185  
186  
187  
188  
189  
190  
191  
192  
193  
194  
195  
196  
197  
198  
199  
200  
201  
202  
203  
204  
205  
206  
207  
208  
209  
210  
211  
212  
213  
214  
215  
216  
217  
218  
219  
220  
221  
222  
223  
224  
225  
226  
227  
228  
229  
230  
231  
232  
233  
234  
235  
236  
237  
238  
239  
240  
241  
242  
243  
244  
245  
246  
247  
248  
249  
250  
251  
252  
253  
254  
255  
256  
257  
258  
259  
260  
261  
262  
263  
264  
265  
266  
267  
268  
269  
270  
271  
272  
273  
274  
275  
276  
277  
278  
279  
280  
281  
282  
283  
284  
285  
286  
287  
288  
289  
290  
291  
292  
293  
294  
295  
296  
297  
298  
299  
300  
301  
302  
303  
304  
305  
306  
307  
308  
309  
310  
311  
312  
313  
314  
315  
316  
317  
318  
319  
320  
321  
322  
323  
324  
325  
326  
327  
328  
329  
330  
331  
332  
333  
334  
335  
336  
337  
338  
339  
340  
341  
342  
343  
344  
345  
346  
347  
348  
349  
350  
351  
352  
353  
354  
355  
356  
357  
358  
359  
360  
361  
362  
363  
364  
365  
366  
367  
368  
369  
370  
371  
372  
373  
374  
375  
376  
377  
378  
379  
380  
381  
382  
383  
384  
385  
386  
387  
388  
389  
390  
391  
392  
393  
394  
395  
396  
397  
398  
399  
400  
401  
402  
403  
404  
405  
406  
407  
408  
409  
410  
411  
412  
413  
414  
415  
416  
417  
418  
419  
420  
421  
422  
423  
424  
425  
426  
427  
428  
429  
430  
431  
432  
433  
434  
435  
436  
437  
438  
439  
440  
441  
442  
443  
444  
445  
446  
447  
448  
449  
450  
451  
452  
453  
454  
455  
456  
457  
458  
459  
460  
461  
462  
463  
464  
465  
466  
467  
468  
469  
470  
471  
472  
473  
474  
475  
476  
477  
478  
479  
480  
481  
482  
483  
484  
485  
486  
487  
488  
489  
490  
491  
492  
493  
494  
495  
496  
497  
498  
499  
500  
501  
502  
503  
504  
505  
506  
507  
508  
509  
510  
511  
512  
513  
514  
515  
516  
517  
518  
519  
520  
521  
522  
523  
524  
525  
526  
527  
528  
529  
530  
531  
532  
533  
534  
535  
536  
537  
538  
539  
540  
541  
542  
543  
544  
545  
546  
547  
548  
549  
550  
551  
552  
553  
554  
555  
556  
557  
558  
559  
560  
561  
562  
563  
564  
565  
566  
567  
568  
569  
570  
571  
572  
573  
574  
575  
576  
577  
578  
579  
580  
581  
582  
583  
584  
585  
586  
587  
588  
589  
590  
591  
592  
593  
594  
595  
596  
597  
598  
599  
600  
601  
602  
603  
604  
605  
606  
607  
608  
609  
610  
611  
612  
613  
614  
615  
616  
617  
618  
619  
620  
621  
622  
623  
624  
625  
626  
627  
628  
629  
630  
631  
632  
633  
634  
635  
636  
637  
638  
639  
640  
641  
642  
643  
644  
645  
646  
647  
648  
649  
650  
651  
652  
653  
654  
655  
656  
657  
658  
659  
660  
661  
662  
663  
664  
665  
666  
667  
668  
669  
670  
671  
672  
673  
674  
675  
676  
677  
678  
679  
680  
681  
682  
683  
684  
685  
686  
687  
688  
689  
690  
691  
692  
693  
694  
695  
696  
697  
698  
699  
700  
701  
702  
703  
704  
705  
706  
707  
708  
709  
710  
711  
712  
713  
714  
715  
716  
717  
718  
719  
720  
721  
722  
723  
724  
725  
726  
727  
728  
729  
730  
731  
732  
733  
734  
735  
736  
737  
738  
739  
740  
741  
742  
743  
744  
745  
746  
747  
748  
749  
750  
751  
752  
753  
754  
755  
756  
757  
758  
759  
760  
761  
762  
763  
764  
765  
766  
767  
768  
769  
770  
771  
772  
773  
774  
775  
776  
777  
778  
779  
780  
781  
782  
783  
784  
785  
786  
787  
788  
789  
790  
791  
792  
793  
794  
795  
796  
797  
798  
799  
800  
801  
802  
803  
804  
805  
806  
807  
808  
809  
810  
811  
812  
813  
814  
815  
816  
817  
818  
819  
820  
821  
822  
823  
824  
825  
826  
827  
828  
829  
830  
831  
832  
833  
834  
835  
836  
837  
838  
839  
840  
841  
842  
843  
844  
845  
846  
847  
848  
849  
850  
851  
852  
853  
854  
855  
856  
857  
858  
859  
860  
861  
862  
863  
864  
865  
866  
867  
868  
869  
870  
871  
872  
873  
874  
875  
876  
877  
878  
879  
880  
881  
882  
883  
884  
885  
886  
887  
888  
889  
890  
891  
892  
893  
894  
895  
896  
897  
898  
899  
900  
901  
902  
903  
904  
905  
906  
907  
908  
909  
910  
911  
912  
913  
914  
915  
916  
917  
918  
919  
920  
921  
922  
923  
924  
925  
926  
927  
928  
929  
930  
931  
932  
933  
934  
935  
936  
937  
938  
939  
940  
941  
942  
943  
944  
945  
946  
947  
948  
949  
950  
951  
952  
953  
954  
955  
956  
957  
958  
959  
960  
961  
962  
963  
964  
965  
966  
967  
968  
969  
970  
971  
972  
973  
974  
975  
976  
977  
978  
979  
980  
981  
982  
983  
984  
985  
986  
987  
988  
989  
990  
991  
992  
993  
994  
995  
996  
997  
998  
999  
1000  
1001  
1002  
1003  
1004  
1005  
1006  
1007  
1008  
1009  
1010  
1011  
1012  
1013  
1014  
1015  
1016  
1017  
1018  
1019  
1020  
1021  
1022  
1023  
1024  
1025  
1026  
1027  
1028  
1029  
1030  
1031  
1032  
1033  
1034  
1035  
1036  
1037  
1038  
1039  
1040  
1041  
1042  
1043  
1044  
1045  
1046  
1047  
1048  
1049  
1050  
1051  
1052  
1053  
1054  
1055  
1056  
1057  
1058  
1059  
1060  
1061  
1062  
1063  
1064  
1065  
1066  
1067  
1068  
1069  
1070  
1071  
1072  
1073  
1074  
1075  
1076  
1077  
1078  
1079  
1080  
1081  
1082  
1083  
1084  
1085  
1086  
1087  
1088  
1089  
1090  
1091  
1092  
1093  
1094  
1095  
1096  
1097  
1098  
1099  
1100  
1101  
1102  
1103  
1104  
1105  
1106  
1107  
1108  
1109  
1110  
1111  
1112  
1113  
1114  
1115  
1116  
1117  
1118  
1119  
1120  
1121  
1122  
1123  
1124  
1125  
1126  
1127  
1128  
1129  
1130  
1131  
1132  
1133  
1134  
1135  
1136  
1137  
1138  
1139  
1140  
1141  
1142  
1143  
1144  
1145  
1146  
1147  
1148  
1149  
1150  
1151  
1152  
1153  
1154  
1155  
1156  
1157  
1158  
1159  
1160  
1161  
1162  
1163  
1164  
1165  
1166  
1167  
1168  
1169  
1170  
1171  
1172  
1173  
1174  
1175  
1176  
1177  
1178  
1179  
1180  
1181  
1182  
1183  
1184  
1185  
1186  
1187  
1188  
1189  
1190  
1191  
1192  
1193  
1194  
1195  
1196  
1197  
1198  
1199  
1200  
1201  
1202  
1203  
1204  
1205  
1206  
1207  
1208  
1209  
1210  
1211  
1212  
1213  
1214  
1215  
1216  
1217  
1218  
1219  
1220  
1221  
1222  
1223  
1224  
1225  
1226  
1227  
1228  
1229  
1230  
1231  
1232  
1233  
1234  
1235  
1236  
1237  
1238  
1239  
1240  
1241  
1242  
1243  
1244  
1245  
1246  
1247  
1248  
1249  
1250  
1251  
1252  
1253  
1254  
1255  
1256  
1257  
1258  
1259  
1260  
1261  
1262  
1263  
1264  
1265  
1266  
1267  
1268  
1269  
1270  
1271  
1272  
1273  
1274  
1275  
1276  
1277  
1278  
1279  
1280  
1281  
1282  
1283  
1284  
1285  
1286  
1287  
1288  
1289  
1290  
1291  
1292  
1293  
1294  
1295  
1296  
1297  
1298  
1299  
1300  
1301  
1302  
1303  
1304  
1305  
1306  
1307  
1308  
1309  
1310  
1311  
1312  
1313  
1314  
1315  
1316  
1317  
1318  
1319  
1320  
1321  
1322  
1323  
1324  
1325  
1326  
1327  
1328  
1329  
1330  
1331  
1332  
1333  
1334  
1335  
1336  
1337  
1338  
1339  
1340  
1341  
1342  
1343  
1344  
1345  
1346  
1347  
1348  
1349  
1350  
1351  
1352  
1353  
1354  
1355  
1356  
1357  
1358  
1359  
1360  
1361  
1362  
1363  
1364  
1365  
1366  
1367  
1368  
1369  
1370  
1371  
1372  
1373  
1374  
1375  
1376  
1377  
1378  
1379  
1380  
1381  
1382  
1383  
1384  
1385  
1386  
1387  
1388  
1389  
1390  
1391  
1392  
1393  
1394  
1395  
1396  
1397  
1398  
1399  
1400  
1401  
1402  
1403  
1404  
1405  
1406  
1407  
1408  
1409  
1410  
1411  
1412  
1413  
1414  
1415  
1416  
1417  
1418  
1419  
1420  
1421  
1422  
1423  
1424  
1425  
1426  
1427  
1428  
1429  
1430  
1431  
1432  
1433  
1434  
1435  
1436  
1437  
1438  
1439  
1440  
1441  
1442  
1443  
1444  
1445  
1446  
1447  
1448  
1449  
1450  
1451  
1452  
1453  
1454  
1455  
1456  
1457  
1458  
1459  
1460  
1461  
1462  
1463  
1464  
1465  
1466  
1467  
1468  
1469  
1470  
1471  
1472  
1473  
1474  
1475  
1476  
1477  
1478  
1479  
1480  
1481  
1482  
1483  
1484  
1485  
1486  
1487  
1488  
1489  
1490  
1491  
1492  
1493  
1494  
1495  
1496  
1497  
1498  
1499  
1500  
1501  
1502  
1503  
1504  
1505  
1506  
1507  
1508  
1509  
1510  
1511  
1512  
1513  
1514  
1515  
1516  
1517  
1518  
1519  
1520  
1521  
1522  
1523  
1524  
1525  
1526  
1527  
1528  
1529  
1530  
1531  
1532  
1533  
1534  
1535  
1536  
1537  
1538  
1539  
1540  
1541  
1542  
1543  
1544  
1545  
1546  
1547  
1548  
1549  
1550  
1551  
1552  
1553  
1554  
1555  
1556  
1557  
1558  
1559  
1560  
1561  
1562  
1563  
1564  
1565  
1566  
1567  
1568  
1569  
1570  
1571  
1572  
1573  
1574  
1575  
1576  
1577  
1578  
1579  
1580  
1581  
1582  
1583  
1584  
1585  
1586  
1587  
1588  
1589  
1590  
1591  
1592  
1593  
1594  
1595  
1596  
1597  
1598  
1599  
1600  
1601  
1602  
1603  
1604  
1605  
1606  
1607  
1608  
1609  
1610  
1611  
1612  
1613  
1614  
1615  
1616  
1617  
1618  
1619  
1620  
1621  
1622  
1623  
1624  
1625  
1626  
1627  
1628  
1629  
1630  
1631  
1632  
1633  
1634  
1635  
1636  
1637  
1638  
1639  
1640  
1641  
1642  
1643  
1644  
1645  
1646  
1647  
1648  
1649  
1650  
1651  
1652  
1653  
1654  
1655  
1656  
1657  
1658  
1659  
1660  
1661  
1662  
1663  
1664  
1665  
1666  
1667  
1668  
1669  
1670  
1671  
1672  
1673  
1674  
1675  
1676  
1677  
1678  
1679  
1680  
1681  
1682  
1683  
1684  
1685  
1686  
1687  
1688  
1689  
1690  
1691  
1692  
1693  
1694  
1695  
1696  
1697  
1698  
1699  
1700  
1701  
1702  
1703  
1704  
1705  
1706  
1707  
1708  
1709  
1710  
1711  
1712  
1713  
1714  
1715  
1716  
1717  
1718  
1719  
1720  
1721  
1722  
1723  
1724  
1725  
1726  
1727  
1728  
1729  
1730  
1731  
1732  
1733  
1734  
1735  
1736  
1737  
1738  
1739  
1740  
1741  
1742  
1743  
1744  
1745  
1746  
1747  
1748  
1749  
1750  
1751  
1752  
1753  
1754  
1755  
1756  
1757  
1758  
1759  
1760  
1761  
1762  
1763  
1764  
1765  
1766  
1767  
1768  
1769  
1770  
1771  
1772  
1773  
1774  
1775  
1776  
1777  
1778  
1779  
1780  
1781  
1782  
1783  
1784  
1785  
1786  
1787  
1788  
1789  
1790  
1791  
1792  
1793  
1794  
1795  
1796  
1797  
1798  
1799  
1800  
1801  
1802  
1803  
1804  
1805  
1806  
1807  
1808  
1809  
1810  
1811  
1812  
1813  
1814  
1815  
1816  
1817  
1818  
1819  
1820  
1821  
1822  
1823  
1824  
1825  
1826  
1827  
1828  
1829  
1830  
1831  
1832  
1833  
1834  
1835  
1836  
1837  
1838  
1839  
1840  
1841  
1842  
1843  
1844  
1845  
1846  
1847  
1848  
1849  
1850  
1851  
1852  
1853  
1854  
1855  
1856  
1857  
1858  
1859  
1860  
1861  
1862  
1863  
1864  
1865  
1866  
1867  
1868  
1869  
1870  
1871  
1872  
1873  
1874  
1875  
1876  
1877  
1878  
1879  
1880  
1881  
1882  
1883  
1884  
1885  
1886  
1887  
1888  
1889  
1890  
1891  
1892  
1893  
1894  
1895  
1896  
1897  
1898  
1899  
1900  
1901  
1902  
1903  
1904  
1905  
1906  
1907  
1908  
1909  
1910  
1911  
1912  
1913  
1914  
1915  
1916  
1917  
1918  
1919  
1920  
1921  
1922  
1923  
1924  
1925  
1926  
1927  
1928  
1929  
1930  
1931  
1932  
1933  
1934  
1935  
1936  
1937  
1938  
1939  
1940  
1941  
1942  
1943  
1944  
1945  
1946  
1947  
1948  
1949  
1950  
1951  
1952  
1953  
1954  
1955  
1956  
1957  
1958  
1959  
1960  
1961  
1962  
1963  
1964  
1965  
1966  
1967  
1968  
1969  
1970  
1971  
1972  
1973  
1974  
1975  
1976  
1977  
1978  
1979  
1980  
1981  
1982  
1983  
1984  
1985  
1986  
1987  
1988  
1989  
1990  
1991  
1992  
1993  
1994  
1995  
1996  
1997  
1998  
1999  
2000  
2001  
2002  
2003  
2004  
2005  
2006  
2007  
2008  
2009  
2010  
2011  
2012  
2013  
2014  
2015  
2016  
2017  
2018  
2019  
2020  
2021  
2022  
2023  
2024  
2025  
2026  
2027  
2028  
2029  
2030  
2031  
2032  
2033  
2034  
2035  
2036  
2037  
2038  
2039  
2040  
2041  
2042  
2043  
2044  
2045  
2046  
2047  
2048  
2049  
2050  
2051  
2052  
2053  
2054  
2055  
2056  
2057  
2058  
2059  
2060  
2061  
2062  
2063  
2064  
2065  
2066  
2067  
2068  
2069  
2070  
2071  
2072  
2073  
2074  
2075  
2076  
2077  
2078  
2079  
2080  
2081  
2082  
2083  
2084  
2085  
2086  
2087  
2088  
2089  
2090  
2091  
2092  
2093  
2094  
2095  
2096  
2097  
2098  
2099  
2100  
2101  
2102  
2103  
2104  
2105  
2106  
2107  
2108  
2109  
2110  
2111  
2112  
2113  
2114  
2115  
2116  
2117  
2118  
2119  
2120  
2121  
2122  
2123  
2124  
2125  
2126  
2127  
2128  
2129  
2130  
2131  
2132  
2133  
2134  
2135  
2136  
2137  
2138  
2139  
2140  
2141  
2142  
2143  
2144  
2145  
2146  
2147  
2148  
2149  
2150  
2151  
2152  
2153  
2154  
2155  
2156  
2157  
2158  
2159  
2160  
2161  
2162  
2163  
2164  
2165  
2166  
2167  
2168  
2169  
2170  
2171  
2172  
2173  
2174  
2175  
2176  
2177  
2178  
2179  
2180  
2181  
2182  
2183  
2184  
2185  
2186  
2187  
2188  
2189  
2190  
2191  
2192  
2193  
2194  
2195  
2196  
2197  
2198  
2199  
2200  
2201  
2202  
2203  
2204  
2205  
2206  
2207  
2208  
2209  
2210  
2211  
2212  
2213  
221

The portal calculated harm rates and produced run charts that hospitals could download. Contributing hospitals consented to their data being collated and published to further the understanding of harm in hospitalised children in the UK. Participating hospitals developed local administrative and governance arrangements for PTT reviews following the standard guidance.

### Aims and methodology

The aims of this study are to:

- 1. Describe the rate and severity of harm occurring in hospitalised children from UK centres submitting data to the NHS Institute's Trigger Tool portal.
- 2. Report the frequency and positive predictive value (PPV) of triggers to detect harm.
- 3. Make recommendations for further application and development of the tool.

Participating hospitals, which voluntarily decided to use the PTT, included secondary, tertiary and quaternary centers. Reviewers were trained in trigger tool methodology either by experts at the NHS Institute or by using on-line resources with telephone support. Data was collected through the on-line trigger tool portal that opened in Feb 2008.

### Results

Data from 3992 case note reviews from 25 hospitals submitted to the trigger tool portal between February 2008 and November 2011 were analysed. Nine of the hospitals were children's hospitals; the remainder were classed as district general hospitals. Data from four additional hospitals that used the portal were excluded because they each submitted less than 10 case entries. Harm was

**Formatted:** Justified, Numbered + Level: 1 + Numbering Style: 1, 2, 3, ... + Start at: 1 + Alignment: Left + Aligned at: 0" + Indent at: 0.25"

**Formatted:** Justified

1  
2  
3  
4  
5  
6  
7 recorded as occurring for 567 patients (14.2%) while the majority (85.8%) of  
8 patients experienced no evidence of harm. Reviewers identified 1001 adverse  
9 events, an average of 1.8 events per patient experiencing harm.

10  
11  
12  
13  
14  
15  
16  
17  
18  
19  
20  
21  
22  
23  
24  
25  
26  
27  
28  
29  
30  
31  
32  
33  
34  
35  
36  
37  
38  
39  
40  
41  
42  
43  
44  
45  
46  
47  
48  
49  
50  
51  
52  
53  
54  
55  
56  
57  
58  
59  
60  
61  
62  
63  
64  
65  
66  
67  
68  
69  
70  
71  
72  
73  
74  
75  
76  
77  
78  
79  
80  
81  
82  
83  
84  
85  
86  
87  
88  
89  
90  
91  
92  
93  
94  
95  
96  
97  
98  
99  
100  
101  
102  
103  
104  
105  
106  
107  
108  
109  
110  
111  
112  
113  
114  
115  
116  
117  
118  
119  
120  
121  
122  
123  
124  
125  
126  
127  
128  
129  
130  
131  
132  
133  
134  
135  
136  
137  
138  
139  
140  
141  
142  
143  
144  
145  
146  
147  
148  
149  
150  
151  
152  
153  
154  
155  
156  
157  
158  
159  
160  
161  
162  
163  
164  
165  
166  
167  
168  
169  
170  
171  
172  
173  
174  
175  
176  
177  
178  
179  
180  
181  
182  
183  
184  
185  
186  
187  
188  
189  
190  
191  
192  
193  
194  
195  
196  
197  
198  
199  
200  
201  
202  
203  
204  
205  
206  
207  
208  
209  
210  
211  
212  
213  
214  
215  
216  
217  
218  
219  
220  
221  
222  
223  
224  
225  
226  
227  
228  
229  
230  
231  
232  
233  
234  
235  
236  
237  
238  
239  
240  
241  
242  
243  
244  
245  
246  
247  
248  
249  
250  
251  
252  
253  
254  
255  
256  
257  
258  
259  
260  
261  
262  
263  
264  
265  
266  
267  
268  
269  
270  
271  
272  
273  
274  
275  
276  
277  
278  
279  
280  
281  
282  
283  
284  
285  
286  
287  
288  
289  
290  
291  
292  
293  
294  
295  
296  
297  
298  
299  
300  
301  
302  
303  
304  
305  
306  
307  
308  
309  
310  
311  
312  
313  
314  
315  
316  
317  
318  
319  
320  
321  
322  
323  
324  
325  
326  
327  
328  
329  
330  
331  
332  
333  
334  
335  
336  
337  
338  
339  
340  
341  
342  
343  
344  
345  
346  
347  
348  
349  
350  
351  
352  
353  
354  
355  
356  
357  
358  
359  
360  
361  
362  
363  
364  
365  
366  
367  
368  
369  
370  
371  
372  
373  
374  
375  
376  
377  
378  
379  
380  
381  
382  
383  
384  
385  
386  
387  
388  
389  
390  
391  
392  
393  
394  
395  
396  
397  
398  
399  
400  
401  
402  
403  
404  
405  
406  
407  
408  
409  
410  
411  
412  
413  
414  
415  
416  
417  
418  
419  
420  
421  
422  
423  
424  
425  
426  
427  
428  
429  
430  
431  
432  
433  
434  
435  
436  
437  
438  
439  
440  
441  
442  
443  
444  
445  
446  
447  
448  
449  
450  
451  
452  
453  
454  
455  
456  
457  
458  
459  
460  
461  
462  
463  
464  
465  
466  
467  
468  
469  
470  
471  
472  
473  
474  
475  
476  
477  
478  
479  
480  
481  
482  
483  
484  
485  
486  
487  
488  
489  
490  
491  
492  
493  
494  
495  
496  
497  
498  
499  
500  
501  
502  
503  
504  
505  
506  
507  
508  
509  
510  
511  
512  
513  
514  
515  
516  
517  
518  
519  
520  
521  
522  
523  
524  
525  
526  
527  
528  
529  
530  
531  
532  
533  
534  
535  
536  
537  
538  
539  
540  
541  
542  
543  
544  
545  
546  
547  
548  
549  
550  
551  
552  
553  
554  
555  
556  
557  
558  
559  
560  
561  
562  
563  
564  
565  
566  
567  
568  
569  
570  
571  
572  
573  
574  
575  
576  
577  
578  
579  
580  
581  
582  
583  
584  
585  
586  
587  
588  
589  
590  
591  
592  
593  
594  
595  
596  
597  
598  
599  
600  
601  
602  
603  
604  
605  
606  
607  
608  
609  
610  
611  
612  
613  
614  
615  
616  
617  
618  
619  
620  
621  
622  
623  
624  
625  
626  
627  
628  
629  
630  
631  
632  
633  
634  
635  
636  
637  
638  
639  
640  
641  
642  
643  
644  
645  
646  
647  
648  
649  
650  
651  
652  
653  
654  
655  
656  
657  
658  
659  
660  
661  
662  
663  
664  
665  
666  
667  
668  
669  
670  
671  
672  
673  
674  
675  
676  
677  
678  
679  
680  
681  
682  
683  
684  
685  
686  
687  
688  
689  
690  
691  
692  
693  
694  
695  
696  
697  
698  
699  
700  
701  
702  
703  
704  
705  
706  
707  
708  
709  
710  
711  
712  
713  
714  
715  
716  
717  
718  
719  
720  
721  
722  
723  
724  
725  
726  
727  
728  
729  
730  
731  
732  
733  
734  
735  
736  
737  
738  
739  
740  
741  
742  
743  
744  
745  
746  
747  
748  
749  
750  
751  
752  
753  
754  
755  
756  
757  
758  
759  
760  
761  
762  
763  
764  
765  
766  
767  
768  
769  
770  
771  
772  
773  
774  
775  
776  
777  
778  
779  
780  
781  
782  
783  
784  
785  
786  
787  
788  
789  
790  
791  
792  
793  
794  
795  
796  
797  
798  
799  
800  
801  
802  
803  
804  
805  
806  
807  
808  
809  
810  
811  
812  
813  
814  
815  
816  
817  
818  
819  
820  
821  
822  
823  
824  
825  
826  
827  
828  
829  
830  
831  
832  
833  
834  
835  
836  
837  
838  
839  
840  
841  
842  
843  
844  
845  
846  
847  
848  
849  
850  
851  
852  
853  
854  
855  
856  
857  
858  
859  
860  
861  
862  
863  
864  
865  
866  
867  
868  
869  
870  
871  
872  
873  
874  
875  
876  
877  
878  
879  
880  
881  
882  
883  
884  
885  
886  
887  
888  
889  
890  
891  
892  
893  
894  
895  
896  
897  
898  
899  
900  
901  
902  
903  
904  
905  
906  
907  
908  
909  
910  
911  
912  
913  
914  
915  
916  
917  
918  
919  
920  
921  
922  
923  
924  
925  
926  
927  
928  
929  
930  
931  
932  
933  
934  
935  
936  
937  
938  
939  
940  
941  
942  
943  
944  
945  
946  
947  
948  
949  
950  
951  
952  
953  
954  
955  
956  
957  
958  
959  
960  
961  
962  
963  
964  
965  
966  
967  
968  
969  
970  
971  
972  
973  
974  
975  
976  
977  
978  
979  
980  
981  
982  
983  
984  
985  
986  
987  
988  
989  
990  
991  
992  
993  
994  
995  
996  
997  
998  
999  
1000  
1001  
1002  
1003  
1004  
1005  
1006  
1007  
1008  
1009  
1010  
1011  
1012  
1013  
1014  
1015  
1016  
1017  
1018  
1019  
1020  
1021  
1022  
1023  
1024  
1025  
1026  
1027  
1028  
1029  
1030  
1031  
1032  
1033  
1034  
1035  
1036  
1037  
1038  
1039  
1040  
1041  
1042  
1043  
1044  
1045  
1046  
1047  
1048  
1049  
1050  
1051  
1052  
1053  
1054  
1055  
1056  
1057  
1058  
1059  
1060  
1061  
1062  
1063  
1064  
1065  
1066  
1067  
1068  
1069  
1070  
1071  
1072  
1073  
1074  
1075  
1076  
1077  
1078  
1079  
1080  
1081  
1082  
1083  
1084  
1085  
1086  
1087  
1088  
1089  
1090  
1091  
1092  
1093  
1094  
1095  
1096  
1097  
1098  
1099  
1100  
1101  
1102  
1103  
1104  
1105  
1106  
1107  
1108  
1109  
1110  
1111  
1112  
1113  
1114  
1115  
1116  
1117  
1118  
1119  
1120  
1121  
1122  
1123  
1124  
1125  
1126  
1127  
1128  
1129  
1130  
1131  
1132  
1133  
1134  
1135  
1136  
1137  
1138  
1139  
1140  
1141  
1142  
1143  
1144  
1145  
1146  
1147  
1148  
1149  
1150  
1151  
1152  
1153  
1154  
1155  
1156  
1157  
1158  
1159  
1160  
1161  
1162  
1163  
1164  
1165  
1166  
1167  
1168  
1169  
1170  
1171  
1172  
1173  
1174  
1175  
1176  
1177  
1178  
1179  
1180  
1181  
1182  
1183  
1184  
1185  
1186  
1187  
1188  
1189  
1190  
1191  
1192  
1193  
1194  
1195  
1196  
1197  
1198  
1199  
1200  
1201  
1202  
1203  
1204  
1205  
1206  
1207  
1208  
1209  
1210  
1211  
1212  
1213  
1214  
1215  
1216  
1217  
1218  
1219  
1220  
1221  
1222  
1223  
1224  
1225  
1226  
1227  
1228  
1229  
1230  
1231  
1232  
1233  
1234  
1235  
1236  
1237  
1238  
1239  
1240  
1241  
1242  
1243  
1244  
1245  
1246  
1247  
1248  
1249  
1250  
1251  
1252  
1253  
1254  
1255  
1256  
1257  
1258  
1259  
1260  
1261  
1262  
1263  
1264  
1265  
1266  
1267  
1268  
1269  
1270  
1271  
1272  
1273  
1274  
1275  
1276  
1277  
1278  
1279  
1280  
1281  
1282  
1283  
1284  
1285  
1286  
1287  
1288  
1289  
1290  
1291  
1292  
1293  
1294  
1295  
1296  
1297  
1298  
1299  
1300  
1301  
1302  
1303  
1304  
1305  
1306  
1307  
1308  
1309  
1310  
1311  
1312  
1313  
1314  
1315  
1316  
1317  
1318  
1319  
1320  
1321  
1322  
1323  
1324  
1325  
1326  
1327  
1328  
1329  
1330  
1331  
1332  
1333  
1334  
1335  
1336  
1337  
1338  
1339  
1340  
1341  
1342  
1343  
1344  
1345  
1346  
1347  
1348  
1349  
1350  
1351  
1352  
1353  
1354  
1355  
1356  
1357  
1358  
1359  
1360  
1361  
1362  
1363  
1364  
1365  
1366  
1367  
1368  
1369  
1370  
1371  
1372  
1373  
1374  
1375  
1376  
1377  
1378  
1379  
1380  
1381  
1382  
1383  
1384  
1385  
1386  
1387  
1388  
1389  
1390  
1391  
1392  
1393  
1394  
1395  
1396  
1397  
1398  
1399  
1400  
1401  
1402  
1403  
1404  
1405  
1406  
1407  
1408  
1409  
1410  
1411  
1412  
1413  
1414  
1415  
1416  
1417  
1418  
1419  
1420  
1421  
1422  
1423  
1424  
1425  
1426  
1427  
1428  
1429  
1430  
1431  
1432  
1433  
1434  
1435  
1436  
1437  
1438  
1439  
1440  
1441  
1442  
1443  
1444  
1445  
1446  
1447  
1448  
1449  
1450  
1451  
1452  
1453  
1454  
1455  
1456  
1457  
1458  
1459  
1460  
1461  
1462  
1463  
1464  
1465  
1466  
1467  
1468  
1469  
1470  
1471  
1472  
1473  
1474  
1475  
1476  
1477  
1478  
1479  
1480  
1481  
1482  
1483  
1484  
1485  
1486  
1487  
1488  
1489  
1490  
1491  
1492  
1493  
1494  
1495  
1496  
1497  
1498  
1499  
1500  
1501  
1502  
1503  
1504  
1505  
1506  
1507  
1508  
1509  
1510  
1511  
1512  
1513  
1514  
1515  
1516  
1517  
1518  
1519  
1520  
1521  
1522  
1523  
1524  
1525  
1526  
1527  
1528  
1529  
1530  
1531  
1532  
1533  
1534  
1535  
1536  
1537  
1538  
1539  
1540  
1541  
1542  
1543  
1544  
1545  
1546  
1547  
1548  
1549  
1550  
1551  
1552  
1553  
1554  
1555  
1556  
1557  
1558  
1559  
1560  
1561  
1562  
1563  
1564  
1565  
1566  
1567  
1568  
1569  
1570  
1571  
1572  
1573  
1574  
1575  
1576  
1577  
1578  
1579  
1580  
1581  
1582  
1583  
1584  
1585  
1586  
1587  
1588  
1589  
1590  
1591  
1592  
1593  
1594  
1595  
1596  
1597  
1598  
1599  
1600  
1601  
1602  
1603  
1604  
1605  
1606  
1607  
1608  
1609  
1610  
1611  
1612  
1613  
1614  
1615  
1616  
1617  
1618  
1619  
1620  
1621  
1622  
1623  
1624  
1625  
1626  
1627  
1628  
1629  
1630  
1631  
1632  
1633  
1634  
1635  
1636  
1637  
1638  
1639  
1640  
1641  
1642  
1643  
1644  
1645  
1646  
1647  
1648  
1649  
1650  
1651  
1652  
1653  
1654  
1655  
1656  
1657  
1658  
1659  
1660  
1661  
1662  
1663  
1664  
1665  
1666  
1667  
1668  
1669  
1670  
1671  
1672  
1673  
1674  
1675  
1676  
1677  
1678  
1679  
1680  
1681  
1682  
1683  
1684  
1685  
1686  
1687  
1688  
1689  
1690  
1691  
1692  
1693  
1694  
1695  
1696  
1697  
1698  
1699  
1700  
1701  
1702  
1703  
1704  
1705  
1706  
1707  
1708  
1709  
1710  
1711  
1712  
1713  
1714  
1715  
1716  
1717  
1718  
1719  
1720  
1721  
1722  
1723  
1724  
1725  
1726  
1727  
1728  
1729  
1730  
1731  
1732  
1733  
1734  
1735  
1736  
1737  
1738  
1739  
1740  
1741  
1742  
1743  
1744  
1745  
1746  
1747  
1748  
1749  
1750  
1751  
1752  
1753  
1754  
1755  
1756  
1757  
1758  
1759  
1760  
1761  
1762  
1763  
1764  
1765  
1766  
1767  
1768  
1769  
1770  
1771  
1772  
1773  
1774  
1775  
1776  
1777  
1778  
1779  
1780  
1781  
1782  
1783  
1784  
1785  
1786  
1787  
1788  
1789  
1790  
1791  
1792  
1793  
1794  
1795  
1796  
1797  
1798  
1799  
1800  
1801  
1802  
1803  
1804  
1805  
1806  
1807  
1808  
1809  
1810  
1811  
1812  
1813  
1814  
1815  
1816  
1817  
1818  
1819  
1820  
1821  
1822  
1823  
1824  
1825  
1826  
1827  
1828  
1829  
1830  
1831  
1832  
1833  
1834  
1835  
1836  
1837  
1838  
1839  
1840  
1841  
1842  
1843  
1844  
1845  
1846  
1847  
1848  
1849  
1850  
1851  
1852  
1853  
1854  
1855  
1856  
1857  
1858  
1859  
1860  
1861  
1862  
1863  
1864  
1865  
1866  
1867  
1868  
1869  
1870  
1871  
1872  
1873  
1874  
1875  
1876  
1877  
1878  
1879  
1880  
1881  
1882  
1883  
1884  
1885  
1886  
1887  
1888  
1889  
1890  
1891  
1892  
1893  
1894  
1895  
1896  
1897  
1898  
1899  
1900  
1901  
1902  
1903  
1904  
1905  
1906  
1907  
1908  
1909  
1910  
1911  
1912  
1913  
1914  
1915  
1916  
1917  
1918  
1919  
1920  
1921  
1922  
1923  
1924  
1925  
1926  
1927  
1928  
1929  
1930  
1931  
1932  
1933  
1934  
1935  
1936  
1937  
1938  
1939  
1940  
1941  
1942  
1943  
1944  
1945  
1946  
1947  
1948  
1949  
1950  
1951  
1952  
1953  
1954  
1955  
1956  
1957  
1958  
1959  
1960  
1961  
1962  
1963  
1964  
1965  
1966  
1967  
1968  
1969  
1970  
1971  
1972  
1973  
1974  
1975  
1976  
1977  
1978  
1979  
1980  
1981  
1982  
1983  
1984  
1985  
1986  
1987  
1988  
1989  
1990  
1991  
1992  
1993  
1994  
1995  
1996  
1997  
1998  
1999  
2000

There was considerable variation between hospitals in the number of case notes reviewed (12 – 622), the number of triggers detected (17 – 1877) and overall harm rate reported (0% - 10073.3%). Results from each hospital are reported in Table 1. Of the 567 children who suffered an AE, the majority (n=356, 63%) experienced a single event. However 211 (37%) of patients suffered more than one AE within the same admission. One patient was reported to have suffered 10 AEs in a single admission. A summary of the number of adverse events per case is presented in Table 2.

Individual triggers varied in their ability to lead to detection of harm. The trigger *Complications of procedure or treatment* yielded the greatest amount of harm (182 AEs). The PPV varied from 80.0% for *surgical site infection* to 2.62% for *missing observations/early warning scores*. The PPV was generally low in frequently identified triggers, such as *missing observations/early warning scores* (PPV 2.6%) and *unplanned admission* (PPV 4.0%). The positive triggers, adverse events and PPV for each trigger are displayed in Table 3.

The majority of adverse events (n=923, 92.2%) resulted in temporary harm to the patient (grade E and F – see Table 5-123[15]), 43 AEs required life-sustaining interventions and 18 resulted in permanent harm. In 17 cases, the adverse event was believed to have contributed to the child's death (Table 4).

## Discussion

The complexity of uncovering harm is reflected in the numerous ways that one has to measure it.[17] Traditional methods such as incident reporting have limitations, especially that of underreporting, due to the reliance on individual clinicians to recognise and report adverse events, as well as a tendency to focus on error, rather than harm. The measurement and examination of harm, rather than that of error, recognises that efforts to improve patient safety benefit from focusing on incidents that result in actual harm, identifying high risk situations, considering preventability and looking for means of early detection and harm limitation.[18] This deeper understanding of the harm to which patients are exposed is a recent phenomenon and in paediatrics the potential risks to safety are multiple.[19] The call for Zero Harm and the focus on safety in recent reports.[20, 21] reflects the importance of the identification and understanding of harm as an essential part of patients care. Clinicians have not known the actual levels of harm caused and have relied on a reporting system for clinical incidents.

Harm rates vary widely because of multiple factors, such as the definition of harm used, the methodology employed and the population studied. Until recently most studies sought to establish harm rates for benchmarking purposes over large populations with suggestions that between 3-17% of patients experience an adverse event during a hospital admission.[22] Most of these studies used retrospective, unstructured case note reviews which are labour-intensive, costly and impractical for the routine monitoring of harm.[23] Trigger tool methodology is accepted as one of the ways to measure harm in a way that allows local

1  
2  
3  
4  
5  
6  
7 learning,[1,3,2] Trigger tools have also been reported to provide consistent  
8 reliable and relevant data at low cost,[2,3] although the cost may vary between  
9 different hospitals.

10  
11  
12  
13  
14  
15  
16  
17  
18  
19  
20  
21  
22  
23  
24  
25  
26  
27  
28  
29  
30  
31  
32  
33  
34  
35  
36  
37  
38  
39  
40  
41  
42  
43  
44  
45  
46  
47  
48  
49  
50  
51  
52  
53  
54  
55  
56  
57  
58  
59  
60  
61  
62  
63  
64  
65  
66  
67  
68  
69  
70  
71  
72  
73  
74  
75  
76  
77  
78  
79  
80  
81  
82  
83  
84  
85  
86  
87  
88  
89  
90  
91  
92  
93  
94  
95  
96  
97  
98  
99  
100  
101  
102  
103  
104  
105  
106  
107  
108  
109  
110  
111  
112  
113  
114  
115  
116  
117  
118  
119  
120  
121  
122  
123  
124  
125  
126  
127  
128  
129  
130  
131  
132  
133  
134  
135  
136  
137  
138  
139  
140  
141  
142  
143  
144  
145  
146  
147  
148  
149  
150  
151  
152  
153  
154  
155  
156  
157  
158  
159  
160  
161  
162  
163  
164  
165  
166  
167  
168  
169  
170  
171  
172  
173  
174  
175  
176  
177  
178  
179  
180  
181  
182  
183  
184  
185  
186  
187  
188  
189  
190  
191  
192  
193  
194  
195  
196  
197  
198  
199  
200  
201  
202  
203  
204  
205  
206  
207  
208  
209  
210  
211  
212  
213  
214  
215  
216  
217  
218  
219  
220  
221  
222  
223  
224  
225  
226  
227  
228  
229  
230  
231  
232  
233  
234  
235  
236  
237  
238  
239  
240  
241  
242  
243  
244  
245  
246  
247  
248  
249  
250  
251  
252  
253  
254  
255  
256  
257  
258  
259  
260  
261  
262  
263  
264  
265  
266  
267  
268  
269  
270  
271  
272  
273  
274  
275  
276  
277  
278  
279  
280  
281  
282  
283  
284  
285  
286  
287  
288  
289  
290  
291  
292  
293  
294  
295  
296  
297  
298  
299  
300  
301  
302  
303  
304  
305  
306  
307  
308  
309  
310  
311  
312  
313  
314  
315  
316  
317  
318  
319  
320  
321  
322  
323  
324  
325  
326  
327  
328  
329  
330  
331  
332  
333  
334  
335  
336  
337  
338  
339  
340  
341  
342  
343  
344  
345  
346  
347  
348  
349  
350  
351  
352  
353  
354  
355  
356  
357  
358  
359  
360  
361  
362  
363  
364  
365  
366  
367  
368  
369  
370  
371  
372  
373  
374  
375  
376  
377  
378  
379  
380  
381  
382  
383  
384  
385  
386  
387  
388  
389  
390  
391  
392  
393  
394  
395  
396  
397  
398  
399  
400  
401  
402  
403  
404  
405  
406  
407  
408  
409  
410  
411  
412  
413  
414  
415  
416  
417  
418  
419  
420  
421  
422  
423  
424  
425  
426  
427  
428  
429  
430  
431  
432  
433  
434  
435  
436  
437  
438  
439  
440  
441  
442  
443  
444  
445  
446  
447  
448  
449  
450  
451  
452  
453  
454  
455  
456  
457  
458  
459  
460  
461  
462  
463  
464  
465  
466  
467  
468  
469  
470  
471  
472  
473  
474  
475  
476  
477  
478  
479  
480  
481  
482  
483  
484  
485  
486  
487  
488  
489  
490  
491  
492  
493  
494  
495  
496  
497  
498  
499  
500  
501  
502  
503  
504  
505  
506  
507  
508  
509  
510  
511  
512  
513  
514  
515  
516  
517  
518  
519  
520  
521  
522  
523  
524  
525  
526  
527  
528  
529  
530  
531  
532  
533  
534  
535  
536  
537  
538  
539  
540  
541  
542  
543  
544  
545  
546  
547  
548  
549  
550  
551  
552  
553  
554  
555  
556  
557  
558  
559  
560  
561  
562  
563  
564  
565  
566  
567  
568  
569  
570  
571  
572  
573  
574  
575  
576  
577  
578  
579  
580  
581  
582  
583  
584  
585  
586  
587  
588  
589  
590  
591  
592  
593  
594  
595  
596  
597  
598  
599  
600  
601  
602  
603  
604  
605  
606  
607  
608  
609  
610  
611  
612  
613  
614  
615  
616  
617  
618  
619  
620  
621  
622  
623  
624  
625  
626  
627  
628  
629  
630  
631  
632  
633  
634  
635  
636  
637  
638  
639  
640  
641  
642  
643  
644  
645  
646  
647  
648  
649  
650  
651  
652  
653  
654  
655  
656  
657  
658  
659  
660  
661  
662  
663  
664  
665  
666  
667  
668  
669  
670  
671  
672  
673  
674  
675  
676  
677  
678  
679  
680  
681  
682  
683  
684  
685  
686  
687  
688  
689  
690  
691  
692  
693  
694  
695  
696  
697  
698  
699  
700  
701  
702  
703  
704  
705  
706  
707  
708  
709  
710  
711  
712  
713  
714  
715  
716  
717  
718  
719  
720  
721  
722  
723  
724  
725  
726  
727  
728  
729  
730  
731  
732  
733  
734  
735  
736  
737  
738  
739  
740  
741  
742  
743  
744  
745  
746  
747  
748  
749  
750  
751  
752  
753  
754  
755  
756  
757  
758  
759  
760  
761  
762  
763  
764  
765  
766  
767  
768  
769  
770  
771  
772  
773  
774  
775  
776  
777  
778  
779  
780  
781  
782  
783  
784  
785  
786  
787  
788  
789  
790  
791  
792  
793  
794  
795  
796  
797  
798  
799  
800  
801  
802  
803  
804  
805  
806  
807  
808  
809  
810  
811  
812  
813  
814  
815  
816  
817  
818  
819  
820  
821  
822  
823  
824  
825  
826  
827  
828  
829  
830  
831  
832  
833  
834  
835  
836  
837  
838  
839  
840  
841  
842  
843  
844  
845  
846  
847  
848  
849  
850  
851  
852  
853  
854  
855  
856  
857  
858  
859  
860  
861  
862  
863  
864  
865  
866  
867  
868  
869  
870  
871  
872  
873  
874  
875  
876  
877  
878  
879  
880  
881  
882  
883  
884  
885  
886  
887  
888  
889  
890  
891  
892  
893  
894  
895  
896  
897  
898  
899  
900  
901  
902  
903  
904  
905  
906  
907  
908  
909  
910  
911  
912  
913  
914  
915  
916  
917  
918  
919  
920  
921  
922  
923  
924  
925  
926  
927  
928  
929  
930  
931  
932  
933  
934  
935  
936  
937  
938  
939  
940  
941  
942  
943  
944  
945  
946  
947  
948  
949  
950  
951  
952  
953  
954  
955  
956  
957  
958  
959  
960  
961  
962  
963  
964  
965  
966  
967  
968  
969  
970  
971  
972  
973  
974  
975  
976  
977  
978  
979  
980  
981  
982  
983  
984  
985  
986  
987  
988  
989  
990  
991  
992  
993  
994  
995  
996  
997  
998  
999  
1000

This paper represents the largest ~~report~~study of paediatric harm using trigger tool methodology in the United Kingdom. Whilst the primary purpose of a trigger tool is to gain local data for understanding harm in order to improve patient safety locally, we can learn about harm by examining the pooled experiences of the contributing hospitals. ~~The ability to capture, measure and view the results of case notes review using the PTT on a routine basis is a cost effective method of data capture and analysis and of significant value to individual hospitals.~~

The overall harm rate (the percentage of children experiencing one or more AEs during an admission) identified in this study was 14.2%. Previous studies focusing on hospitalised children have identified harm rates of between 1% and 25.8% per admission for the general paediatric hospital population [6, 20, 21] and higher rates within the paediatric intensive care population of 26.1% to 62% [18,19,26]. Two recent studies have examined harm in paediatric hospital populations using trigger tool methodology. The Canadian Paediatric Trigger Tool (CPTT) [25] found a physician reported harm rate of 15.1% of admissions during a validation study across six paediatric hospitals in Canada. Like the UKPTT the CPTT has been adapted to make triggers more sensitive and specific to paediatric situations. The second study, at a single paediatric academic medical center in the US using the adult Global Trigger Tool (GTT) found an overall harm rate of 25.8% [16].

Formatted: Justified

Variation in harm rates may reflect a number of factors. Different methodologies yield different rates of AE identification. Trigger tools are reported to yield higher rates of AE identification than traditional methods such as self-reporting and unstructured case note review [1,26]. Definitions of harm vary as do their interpretation. Professional groups may interpret AEs differently [25]. Assessments of inter-rater reliability have reported high levels of agreement between review team members [16,27,28], but variability between different hospital departments teams [29]. In addition some organisations or teams set a lower threshold for what they see as harm and they may change this over time. Finally, different populations are exposed to different levels of harm depending on the complexity of their illness and the intensity and duration of their care[20]. Most studies report a harm rate per admission meaning that longer admissions are more exposed to opportunity for harm.

The same reasons that explain the variation between international studies explain much of the variation between hospitals in this study. The overall harm rate (the percentage of individual children experiencing one or more AEs during an admission) identified in this study was 14.2%. Previous studies focusing on hospitalised children have identified harm rates of between 1% and 25.8% per admission for the general paediatric hospital population,[12, 13, 18] and higher rates within the paediatric intensive care population of 26.1% to 62%.[10,11,24] Two recent studies have examined harm in paediatric hospital populations using trigger tool methodology. The Canadian Paediatric Trigger Tool (CPTT) found a physician reported harm rate of 15.1% of admissions during a validation study











1  
2  
3  
4  
5  
6  
7 quality of care, as every AE provides insight for improvement, whether deemed  
8 preventable or not.[10]  
9

0  
1  
2 We did not attempt to find out how many of these AEAEs were detected through  
3 other methods, such as incident reporting (we expect that many were). The  
4 purpose of the UKPTT is to extend the ability to detect harm rather than replace  
5 other approaches.  
6  
7  
8  
9

Formatted: Justified

## 10 11 12 13 14 15 16 17 18 19 20 21 22 23 24 25 26 27 28 29 30 31 32 33 34 35 36 37 38 39 40 41 42 43 44 45 46 47 48 49 50 51 52 53 54 55 56 57 58 59 60

**Conclusions and recommendations**

Formatted: Justified

In the context of the increasing demands to improve quality and safety for patients, the UK PTT provides a framework for paediatric clinicians to assess the rate of harm for their individual units, and the quality of their record keeping. This study highlights that currently there is a significant, measurable level of harm, which is sometimes severe, experienced by children admitted to hospitals in the UK. There is a range of predictive values for the triggers and some may be more useful than others. These findings will inform future modifications of the PTT including modifying or removing triggers. It will be important to test any new or augmented triggers with paediatric teams to assess their usefulness.

The recognition and examination of adverse events through methods such as the UK PTT offers the potential to improve paediatric patient safety by concentrating efforts on strategies that reduce patient harm, rather than errors. The key is to produce information that promotes learning and improvement, with clinicians

1  
2  
3  
4  
5  
6  
7 accepting their role to decrease harm from the perspective of the patient, rather  
8  
9 than that of the healthcare provider.

10  
11  
12 We recommend that the UK PTT be used routinely in hospitals to assess harm  
13 and to help develop improvement interventions to reduce it. Although the PTT  
14 has been mainly used in children's hospitals, it can be used in District General or  
15  
16  
17  
18  
19  
20  
21  
22  
23  
24  
25  
26  
27  
28  
29  
30  
31  
32  
33  
34  
35  
36  
37  
38  
39  
40  
41  
42  
43  
44  
45  
46  
47  
48  
49  
50  
51  
52  
53  
54  
55  
56  
57  
58  
59  
60  
61  
62  
63  
64  
65  
66  
67  
68  
69  
70  
71  
72  
73  
74  
75  
76  
77  
78  
79  
80  
81  
82  
83  
84  
85  
86  
87  
88  
89  
90  
91  
92  
93  
94  
95  
96  
97  
98  
99  
100  
101  
102  
103  
104  
105  
106  
107  
108  
109  
110  
111  
112  
113  
114  
115  
116  
117  
118  
119  
120  
121  
122  
123  
124  
125  
126  
127  
128  
129  
130  
131  
132  
133  
134  
135  
136  
137  
138  
139  
140  
141  
142  
143  
144  
145  
146  
147  
148  
149  
150  
151  
152  
153  
154  
155  
156  
157  
158  
159  
160  
161  
162  
163  
164  
165  
166  
167  
168  
169  
170  
171  
172  
173  
174  
175  
176  
177  
178  
179  
180  
181  
182  
183  
184  
185  
186  
187  
188  
189  
190  
191  
192  
193  
194  
195  
196  
197  
198  
199  
200  
201  
202  
203  
204  
205  
206  
207  
208  
209  
210  
211  
212  
213  
214  
215  
216  
217  
218  
219  
220  
221  
222  
223  
224  
225  
226  
227  
228  
229  
230  
231  
232  
233  
234  
235  
236  
237  
238  
239  
240  
241  
242  
243  
244  
245  
246  
247  
248  
249  
250  
251  
252  
253  
254  
255  
256  
257  
258  
259  
260  
261  
262  
263  
264  
265  
266  
267  
268  
269  
270  
271  
272  
273  
274  
275  
276  
277  
278  
279  
280  
281  
282  
283  
284  
285  
286  
287  
288  
289  
290  
291  
292  
293  
294  
295  
296  
297  
298  
299  
300  
301  
302  
303  
304  
305  
306  
307  
308  
309  
310  
311  
312  
313  
314  
315  
316  
317  
318  
319  
320  
321  
322  
323  
324  
325  
326  
327  
328  
329  
330  
331  
332  
333  
334  
335  
336  
337  
338  
339  
340  
341  
342  
343  
344  
345  
346  
347  
348  
349  
350  
351  
352  
353  
354  
355  
356  
357  
358  
359  
360  
361  
362  
363  
364  
365  
366  
367  
368  
369  
370  
371  
372  
373  
374  
375  
376  
377  
378  
379  
380  
381  
382  
383  
384  
385  
386  
387  
388  
389  
390  
391  
392  
393  
394  
395  
396  
397  
398  
399  
400  
401  
402  
403  
404  
405  
406  
407  
408  
409  
410  
411  
412  
413  
414  
415  
416  
417  
418  
419  
420  
421  
422  
423  
424  
425  
426  
427  
428  
429  
430  
431  
432  
433  
434  
435  
436  
437  
438  
439  
440  
441  
442  
443  
444  
445  
446  
447  
448  
449  
450  
451  
452  
453  
454  
455  
456  
457  
458  
459  
460  
461  
462  
463  
464  
465  
466  
467  
468  
469  
470  
471  
472  
473  
474  
475  
476  
477  
478  
479  
480  
481  
482  
483  
484  
485  
486  
487  
488  
489  
490  
491  
492  
493  
494  
495  
496  
497  
498  
499  
500  
501  
502  
503  
504  
505  
506  
507  
508  
509  
510  
511  
512  
513  
514  
515  
516  
517  
518  
519  
520  
521  
522  
523  
524  
525  
526  
527  
528  
529  
530  
531  
532  
533  
534  
535  
536  
537  
538  
539  
540  
541  
542  
543  
544  
545  
546  
547  
548  
549  
550  
551  
552  
553  
554  
555  
556  
557  
558  
559  
560  
561  
562  
563  
564  
565  
566  
567  
568  
569  
570  
571  
572  
573  
574  
575  
576  
577  
578  
579  
580  
581  
582  
583  
584  
585  
586  
587  
588  
589  
590  
591  
592  
593  
594  
595  
596  
597  
598  
599  
600  
601  
602  
603  
604  
605  
606  
607  
608  
609  
610  
611  
612  
613  
614  
615  
616  
617  
618  
619  
620  
621  
622  
623  
624  
625  
626  
627  
628  
629  
630  
631  
632  
633  
634  
635  
636  
637  
638  
639  
640  
641  
642  
643  
644  
645  
646  
647  
648  
649  
650  
651  
652  
653  
654  
655  
656  
657  
658  
659  
660  
661  
662  
663  
664  
665  
666  
667  
668  
669  
670  
671  
672  
673  
674  
675  
676  
677  
678  
679  
680  
681  
682  
683  
684  
685  
686  
687  
688  
689  
690  
691  
692  
693  
694  
695  
696  
697  
698  
699  
700  
701  
702  
703  
704  
705  
706  
707  
708  
709  
710  
711  
712  
713  
714  
715  
716  
717  
718  
719  
720  
721  
722  
723  
724  
725  
726  
727  
728  
729  
730  
731  
732  
733  
734  
735  
736  
737  
738  
739  
740  
741  
742  
743  
744  
745  
746  
747  
748  
749  
750  
751  
752  
753  
754  
755  
756  
757  
758  
759  
760  
761  
762  
763  
764  
765  
766  
767  
768  
769  
770  
771  
772  
773  
774  
775  
776  
777  
778  
779  
780  
781  
782  
783  
784  
785  
786  
787  
788  
789  
790  
791  
792  
793  
794  
795  
796  
797  
798  
799  
800  
801  
802  
803  
804  
805  
806  
807  
808  
809  
810  
811  
812  
813  
814  
815  
816  
817  
818  
819  
820  
821  
822  
823  
824  
825  
826  
827  
828  
829  
830  
831  
832  
833  
834  
835  
836  
837  
838  
839  
840  
841  
842  
843  
844  
845  
846  
847  
848  
849  
850  
851  
852  
853  
854  
855  
856  
857  
858  
859  
860  
861  
862  
863  
864  
865  
866  
867  
868  
869  
870  
871  
872  
873  
874  
875  
876  
877  
878  
879  
880  
881  
882  
883  
884  
885  
886  
887  
888  
889  
890  
891  
892  
893  
894  
895  
896  
897  
898  
899  
900  
901  
902  
903  
904  
905  
906  
907  
908  
909  
910  
911  
912  
913  
914  
915  
916  
917  
918  
919  
920  
921  
922  
923  
924  
925  
926  
927  
928  
929  
930  
931  
932  
933  
934  
935  
936  
937  
938  
939  
940  
941  
942  
943  
944  
945  
946  
947  
948  
949  
950  
951  
952  
953  
954  
955  
956  
957  
958  
959  
960  
961  
962  
963  
964  
965  
966  
967  
968  
969  
970  
971  
972  
973  
974  
975  
976  
977  
978  
979  
980  
981  
982  
983  
984  
985  
986  
987  
988  
989  
990  
991  
992  
993  
994  
995  
996  
997  
998  
999  
1000

We recommend that the UK PTT be used routinely in hospitals to assess harm and to help develop improvement interventions to reduce it. Although the PTT has been mainly used in children's hospitals, it can be used in District General or community hospitals, with a different spectrum of harm being detected. The UK PTT does not replace other reporting mechanisms, but is a useful addition to the methods already used to understand the harm caused to children in hospital care. Harm needs to be detected and assessed through a number of lenses and this lens allows clinicians to further understand what they do and how [harm](#) impacts on children. It provides a way to move from a reactive approach to safety to one that is more proactive and founded in harm free care.

*Susan Chapman and John Fitzsimons are joint first authors*

[The tool and guidance for its use is available from the corresponding author,](#)

[Peter Lachman.](#)

#### **Acknowledgement:**

The authors would like to thank Matt Tite at the NHS Institute for Innovation and Improvement for extracting and processing the data.

The authors would also like to thank all the participating institutions whose unidentifiable data has been made available for the analysis, and those who participated in the development of the UKPTT.

Formatted: Justified

Formatted: Font: Bold

1  
2  
3  
4  
5  
6  
7  
8  
9  
0  
1  
2  
3  
4  
5  
6  
7  
8  
9  
0  
1  
2  
3  
4  
5  
6  
7  
8  
9  
0  
1  
2  
3  
4  
5  
6  
7  
8  
9  
0  
1  
2  
3  
4  
5  
6  
7  
8  
9  
0

**Competing Interest:**

None known.

Formatted: Justified

For peer review only  
DRAFT

Table 1: Number of case reviews, positive triggers and adverse events by individual hospital

| Hospital | Case notes reviewed | Positive triggers | Average number of triggers per case note review | Adverse events | Average number of AE per case note review | Number of individual patients harmed (%) |
|----------|---------------------|-------------------|-------------------------------------------------|----------------|-------------------------------------------|------------------------------------------|
| A        | 622                 | 1877              | 3.02                                            | 309            | 0.50                                      | 162 (26%)                                |
| B        | 369                 | 579               | 1.57                                            | 66             | 0.18                                      | 31 (8%)                                  |
| C        | 321                 | 415               | 1.29                                            | 60             | 0.19                                      | 37 (11.5%)                               |
| D        | 309                 | 481               | 1.56                                            | 117            | 0.38                                      | 49 (15.9%)                               |
| E        | 285                 | 414               | 1.45                                            | 84             | 0.29                                      | 43 (15.1%)                               |
| F        | 271                 | 454               | 1.68                                            | 112            | 0.41                                      | 54 (20%)                                 |
| G        | 260                 | 484               | 1.86                                            | 48             | 0.18                                      | 39 (15%)                                 |
| H        | 241                 | 418               | 1.73                                            | 6              | 0.02                                      | 4 (1.7%)                                 |
| I        | 195                 | 432               | 2.22                                            | 14             | 0.07                                      | 14 (7.2%)                                |
| J        | 195                 | 52                | 0.27                                            | 3              | 0.02                                      | 3 (1.5%)                                 |
| K        | 190                 | 446               | 2.35                                            | 45             | 0.24                                      | 40 (21%)                                 |
| L        | 124                 | 173               | 1.40                                            | 17             | 0.14                                      | 15 (12.1%)                               |
| M        | 71                  | 52                | 0.73                                            | 0              | 0.00                                      | 0 (0%)                                   |
| N        | 70                  | 171               | 2.44                                            | 8              | 0.11                                      | 7 (10%)                                  |
| O        | 68                  | 141               | 2.07                                            | 8              | 0.12                                      | 7 (10.3%)                                |
| P        | 68                  | 107               | 1.57                                            | 1              | 0.01                                      | 1 (1.5%)                                 |
| Q        | 66                  | 79                | 1.20                                            | 15             | 0.23                                      | 11 (16.7%)                               |
| R        | 62                  | 84                | 1.35                                            | 15             | 0.24                                      | 12 (19.3%)                               |
| S        | 60                  | 121               | 2.02                                            | 32             | 0.53                                      | 15 (25%)                                 |
| T        | 59                  | 90                | 1.53                                            | 2              | 0.03                                      | 1 (1.7%)                                 |
| U        | 23                  | 22                | 0.96                                            | 4              | 0.17                                      | 3 (13%)                                  |
| V        | 19                  | 14                | 0.74                                            | 1              | 0.05                                      | 1 (5.2%)                                 |
| W        | 17                  | 26                | 1.53                                            | 4              | 0.24                                      | 4 (23.5%)                                |
| X        | 15                  | 50                | 3.33                                            | 27             | 1.80                                      | 11 (73.3%)                               |
| Y        | 12                  | 17                | 1.42                                            | 3              | 0.25                                      | 3 (25%)                                  |
| Overall  | 3992                | 7199              | 1.65                                            | 1001           | 0.26                                      | 567 (14.2%)                              |

**Table 2: Number of adverse events per patient**

| Number of AE per case | Number of Patients (n= 3992) | % of patient who suffered harm (n=567) |
|-----------------------|------------------------------|----------------------------------------|
| 0                     | 3425                         | N/A                                    |
| 1                     | 356                          | 62.8%                                  |
| 2                     | 111                          | 19.6%                                  |
| 3                     | 40                           | 7.0%                                   |
| 4                     | 28                           | 4.9%                                   |
| 5                     | 16                           | 2.8%                                   |
| 6                     | 8                            | 1.4%                                   |
| 7                     | 5                            | 0.9%                                   |
| 9                     | 2                            | 0.4%                                   |
| 10                    | 1                            | 0.2%                                   |

Table 3: Trigger descriptors, AE and positive predictive value

| Trigger Code | Trigger description                                                                     | Adverse events | Positive Triggers | Severity of harm |    |   |    |   | Trigger PPV |
|--------------|-----------------------------------------------------------------------------------------|----------------|-------------------|------------------|----|---|----|---|-------------|
|              |                                                                                         |                |                   | E                | F  | G | H  | I |             |
| PG8          | Complication of procedure or treatment                                                  | 182            | 257               | 99               | 63 | 6 | 11 | 3 | 70.8%       |
| PG3          | Readmission to hospital within 30 days                                                  | 107            | 462               | 36               | 68 | 0 | 1  | 2 | 23.2%       |
| PG2          | Tissue damage or pressure ulcer                                                         | 81             | 250               | 66               | 12 | 0 | 1  | 2 | 32.4%       |
| PG4          | Unplanned admission                                                                     | 68             | 1668              | 23               | 41 | 0 | 3  | 1 | 4.1%        |
| PO1          | Other (specify)                                                                         | 60             | 425               | 48               | 10 | 0 | 1  | 1 | 14.1%       |
| PS3          | Surgical site infection                                                                 | 48             | 60                | 24               | 22 | 0 | 1  | 1 | 80.0%       |
| PM5          | Anti-emetic given                                                                       | 41             | 507               | 40               | 1  | 0 | 0  | 0 | 8.1%        |
| PG10         | Hypoxia O <sub>2</sub> sat <85%                                                         | 36             | 157               | 31               | 2  | 3 | 0  | 0 | 22.9%       |
| PG1          | EWS or baseline observations missing/incomplete or score/observation requiring response | 35             | 1362              | 26               | 8  | 0 | 1  | 0 | 2.6%        |
| PG9          | Transfer to higher level of care (inc admission to specialist unit, ICU/HDU)            | 35             | 273               | 15               | 14 | 0 | 5  | 1 | 12.8%       |
| PS1          | Return to theatre                                                                       | 33             | 75                | 15               | 15 | 2 | 1  |   | 44.0%       |
| PM7          | IV Bolus ≥ 10ml/kg colloid or crystalloid given                                         | 31             | 386               | 22               | 5  | 1 | 1  | 2 | 8.0%        |
| PG11         | Cancelled elective procedure/ delayed discharge                                         | 24             | 55                | 10               | 12 | 1 | 0  | 1 | 43.6%       |
| PL14         | Positive blood culture                                                                  | 23             | 55                | 18               | 4  | 0 | 1  | 0 | 41.8%       |
| PL13         | Nosocomial Pneumonia                                                                    | 21             | 28                | 8                | 10 | 0 | 2  | 1 | 75.0%       |
| PL5          | Na <sup>+</sup> <130 or >150                                                            | 14             | 71                | 12               | 1  | 0 | 1  | 0 | 19.7%       |
| PG5          | Cranial Imaging                                                                         | 10             | 141               | 4                | 2  | 3 | 0  | 1 | 7.0%        |
| PL8          | Hyperglycaemia (>12mmol/l)                                                              | 11             | 65                | 10               | 1  | 0 | 0  | 0 | 16.9%       |
| PS2          | Change in planned procedure                                                             | 11             | 37                | 6                | 5  | 0 | 0  | 0 | 29.7%       |



|      |                                                          |      |      |     |     |    |    |    |       |
|------|----------------------------------------------------------|------|------|-----|-----|----|----|----|-------|
| PL3  | Abrupt drop in Hb or Hct (>25%)                          | 10   | 65   | 9   | 1   | 0  | 0  | 0  | 15.4% |
| PM8  | Abrupt medication stop                                   | 10   | 52   | 8   | 2   | 0  | 0  | 0  | 19.2% |
| PL8  | Hypoglycaemia (<3mmol/l)                                 | 10   | 46   | 9   | 1   | 0  | 0  | 0  | 21.7% |
| PL9  | Drug level out of range                                  | 10   | 32   | 8   | 2   | 0  | 0  | 0  | 31.3% |
| PL6  | K <sup>+</sup> <3.0 or >6.0                              | 9    | 69   | 8   | 0   | 0  | 1  | 0  | 13.0% |
| IP1  | Readmission to ICU or HDU                                | 9    | 16   | 5   | 1   | 0  | 3  | 0  | 56.3% |
| PS4  | Removal/Injury or repair of organ                        | 9    | 43   | 3   | 5   | 1  | 0  | 0  | 20.9% |
| PG6  | Respiratory/Cardiac arrest/crash call                    | 9    | 41   | 0   | 2   | 0  | 7  | 0  | 22.0% |
| PM5  | Chlorpheniramine given                                   | 9    | 82   | 7   | 2   | 0  | 0  | 0  | 11.0% |
| PL2  | Transfusion                                              | 8    | 143  | 6   | 1   | 0  | 1  | 0  | 5.6%  |
| PL4  | Rising urea or creatinine (>2x baseline)                 | 6    | 54   | 4   | 2   | 0  | 0  | 0  | 11.1% |
| PL15 | Thrombocytopenia                                         | 6    | 54   | 4   | 1   | 0  | 0  | 1  | 11.1% |
| PL1  | High INR (>5) or APTT > 100 sec                          | 6    | 31   | 6   | 0   | 0  | 0  | 0  | 19.4% |
| PM4  | Glucagon or glucose ≥ 10% given                          | 6    | 50   | 6   | 0   | 0  | 0  | 0  | 12.0% |
| PG7  | Diagnostic imaging for embolus/thrombus +/- confirmation | 4    | 24   | 2   | 1   | 1  | 0  | 0  | 16.7% |
| PM2  | Naloxone given                                           | 4    | 16   | 3   | 0   | 0  | 1  | 0  | 25.0% |
| PL11 | <i>C Difficile</i>                                       | 4    | 12   | 3   | 1   | 0  | 0  | 0  | 33.3% |
| PM1  | Vitamin K given (except routine neonatal dose)           | 1    | 33   | 1   | 0   | 0  | 0  | 0  | 3.0%  |
| PM3  | Flumazaniil given                                        | 0    | 2    | 0   | 0   | 0  | 0  | 0  | N/A   |
| PL10 | MRSA bacteraemia                                         | 0    | 0    | 0   | 0   | 0  | 0  | 0  | N/A   |
| PL12 | Vancomycin resistant enterococcus                        | 0    | 0    | 0   | 0   | 0  | 0  | 0  | N/A   |
|      | <b>TOTAL</b>                                             | 1001 | 7199 | 605 | 318 | 18 | 43 | 17 |       |

Table 4: Severity of Adverse Events

| Grade*       | Descriptor                                                                | Adverse Events | % of Total Adverse Events |
|--------------|---------------------------------------------------------------------------|----------------|---------------------------|
| E            | Temporary harm to the patient and required intervention                   | 605            | 60.4%                     |
| F            | Temporary harm to the patient and required initial or prolonged admission | 318            | 31.8%                     |
| G            | Permanent patient harm                                                    | 18             | 1.8%                      |
| H            | Intervention required to sustain life                                     | 43             | 4.3%                      |
| I            | Patient death                                                             | 17             | 1.7%                      |
| <b>Total</b> |                                                                           | <b>1001</b>    |                           |

- National Coordinating Council for Medication Error Reporting and Prevention (NCC MERP) Index<sup>[23]</sup>

REFERENCES

1. Resar RK, Rozich JD, Classen D. Methodology and rationale for the measurement of harm with trigger tools. Qual Saf Health Care. 2003;12 Suppl 2:ii39–45.
2. Beyea SC. Using trigger tools to enhance patient safety. AORN J. 2005;82(1):115–6.
3. Griffin FA, Resar RK. IHI Global Trigger Tool for measuring adverse events (Second Edition). IHI Innovation Series ~~White Paper~~white paper. Cambridge, MA: Institute for Healthcare Improvement. 2009.
4. Classen, D C. Resar RK. The Burden of Harm. Joint Commission Journal on Quality and Patient Safety. 2013;39(7):291-291
- ~~5. Thomas EJ, Peterson LA. Measuring harm and adverse events in healthcare. J of In Med. 2003;18,61-67~~
- ~~6. Woods D, Thomas E, Holl J, et al. Adverse events and preventable adverse events in children. Pediatrics. 2005;115(1):155-60.~~
- ~~7. Review of patient safety for children and young people. National Patient Safety Agency 2009  
http://www.nrls.npsa.nhs.uk/resources/?entryid45=59864 Accessed Nov 2013~~
- ~~8. Report of the Mid Staffordshire NHS Foundation Trust public inquiry (Robert Francis, chair). Staffordshire, United Kingdom: Mid Staffordshire NHS Foundation Trust, February 2013.~~
- ~~9. Berwick report into patient safety. www.gov.uk/government/uploads/system/uploads/attachment\_data/file/226703/Berwick\_Report.pdf~~
- ~~10. Sari ABA, Sheldon TA, Cracknell A, et al. Sensitivity of routine system for reporting patient safety incidents in an NHS hospital: retrospective patient case note review. BMJ. 2007;13;334(7584):79-9.~~
- ~~11. Tinoco A, Evans RS, Staes CJ, et al. Comparison of computerized surveillance and manual chart review for adverse events. Journal of the American Medical Informatics Association. 2011;18(4):491-7.~~
- ~~12. Beyea SC. Using trigger tools to enhance patient safety. AORN J. 2005;82(1):115-6.~~
- ~~13. Griffin FA, Classen DC. Detection of adverse events in surgical patients using the Trigger Tool approach. Qual Saf Health Care.~~

Formatted: Swedish (Sweden)

Formatted: Danish

Formatted: English (U.S.)

2008;17(4):253–8.

146. Resar RK, Rozich JD, Simmonds T, Haraden CR et al. A trigger tool to identify adverse events in the intensive care unit. *Jt Comm J Qual Patient Saf.* 2006;32(10):585–90.

Formatted: English (U.S.)

147. Singh RN, McLean-Plunckett EA, Kee R, et al. Experience with a trigger tool for identifying adverse drug events among older adults in ambulatory primary care. *Qual Saf Health Care.* 2009;18(3):199–204.

Formatted: English (U.S.)

148. Kirkendall ES, Kloppenborg E, Papp J, et al. Measuring Adverse Events and Levels of Harm in Pediatric Inpatients With the Global Trigger Tool. *Pediatrics.* 2012;130(5):e1206–14.

Formatted: English (U.S.)

149. Sharek PJ, Horbar JD, Mason W, et al. Adverse events in the neonatal intensive care unit: development, testing, and findings of an NICU-focused trigger tool to identify harm in North American NICUs. *Pediatrics.* 2006;118(4):1332–40.

Formatted: English (U.S.)

150. Larsen GY, Donaldson AE, Parker HB et al. Preventable harm occurring to critically ill children. *Pediatr Crit Care Med.* 2007;8(4):331–6.

Formatted: English (U.S.)

151. Agarwal S, Classen D, Larsen G, et al. Prevalence of adverse events in pediatric intensive care units in the United States. *Pediatr Crit Care Med.* 2010; 11(5):568–78.

Formatted: English (U.S.)

20

12. Takata GS, Mason W, Taketomo C, et al. Development, testing, and findings of a pediatric-focused trigger tool to identify medication-related harm in US children's hospitals. *Pediatrics.* 2008;121(4):e927–35.

Formatted: English (U.S.)

213. Muething SE, Conway PH, Kloppenborg E, et al. Identifying causes of adverse events detected by an automated trigger tool through in-depth analysis. *BMJ Qual Saf.* 2010;19(5):435–9.

Formatted: Swedish (Sweden)

214. Matlow AG, Cronin CMG, Flintoft V, et al. Description of the development and validation of the Canadian Paediatric Trigger Tool. *BMJ Qual Saf.* 2011;20(5):416–23.

Formatted: Swedish (Sweden)

Formatted: Swedish (Sweden)

23. <http://www.nccmerp.org/medErrorCatIndex.html>.

215. <http://www.nccmerp.org/medErrorCatIndex.html>. (accessed 25 May 2014)

1  
2  
3  
4  
5  
6  
7  
8  
9  
0  
1  
2  
3  
4  
5  
6  
7  
8  
9  
0  
1  
2  
3  
4  
5  
6  
7  
8  
9  
0  
1  
2  
3  
4  
5  
6  
7  
8  
9  
0  
1  
2  
3  
4  
5  
6  
7  
8  
9  
0

16. Carter M. Measuring harm levels with the Global Trigger Tool. *Clinical Risk*. 2010;16:122–6126.

17. Thomas EJ, Petersen LA. Measuring harm and adverse events in healthcare. *J of In Med*. 2003;18:61-67

18. Woods D, Thomas E, Holl J, et al. Adverse events and preventable adverse events in children. *Pediatrics*. 2005;115(1):155–60.

19. Review of patient safety for children and young people. *National Patient Safety Agency 2009*  
<http://www.nrls.npsa.nhs.uk/resources/?entryid45=59864> (accessed 25 May 2014)

20. Mid Staffordshire NHS Foundation Trust Public Inquiry. Report of the Mid Staffordshire NHS Foundation Trust Public Enquiry Feb 2013.  
<http://www.midstaffspublicinquiry.com/report>. (accessed 25 May 2014)

21. National Advisory Group on the Safety of Patients in England. A Promise to Learn a Commitment to Act-Improving the safety of patients in England. 2013. [https://www.gov.uk/government/uploads/system/uploads/attachment\\_data/file/226703/Berwick\\_Report.pdf](https://www.gov.uk/government/uploads/system/uploads/attachment_data/file/226703/Berwick_Report.pdf) (accessed 25 May 2014).

22. Sari ABA, Sheldon TA, Cracknell A, et al. Sensitivity of routine system for reporting patient safety incidents in an NHS hospital: retrospective patient case note review. *BMJ*. 2007;13:334(7584):79..

23. Tinoco A, Evans RS, Staes CJ, et al. Comparison of computerized surveillance and manual chart review for adverse events. *Journal of the American Medical Informatics Association*. 2011;18(4):491–7.

24. Silas R, Tibballs J. Adverse events and comparison of systematic and voluntary reporting from a paediatric intensive care unit. *Qual Saf Health Care*. 2010;19(6):568–71.

25. Matlow AG, Baker GR, Flintoft V, et al. Adverse events among children in Canadian hospitals: the Canadian Paediatric Adverse Events Study. *Canadian Medical Association Journal*. 2012;184(E709-E718).

~~26-26 Silas R, Tibballs J. Adverse events and comparison of systematic and voluntary reporting from a paediatric intensive care unit. *Qual Saf Health Care*. 2010;19(6):568–71.~~

27. Naessens JM, O'Byrne TJ, Johnson MG, et al. Measuring hospital adverse events: assessing inter-rater reliability and trigger performance of the Global Trigger Tool. *Int J Qual Health Care*. 2010;22(4):266–74.

Formatted: Swedish (Sweden)

Formatted: Danish

- 1  
2  
3  
4  
5  
6  
7  
8 ~~2827.~~ Sharek PJ, Parry GJ, Goldmann D, et al. Performance Characteristics of a Methodology to Quantify Adverse Events over Time in  
9 Hospitalized Patients. *Health Serv Res.* ~~2010~~2011;46(2):654–78.
- 10  
11 ~~2928.~~ Zegers M, de Bruijne MC, Spreeuwenberg P, et al. Variation in the rates of adverse events between hospitals and hospital departments. *Int J*  
12 *Qual Health Care.* 2011;23(2):126–33.
- 13  
14 ~~3029.~~ Zegers M, de Bruijne MC, Wagner C, et al. The inter-rater agreement of retrospective assessments of adverse events does not improve with  
15 two reviewers per patient record. *J Clin Epidemiol.* 2010;63(1):94–102.
- 16  
17 ~~3130.~~ Woods DM, Holl JL, Shonkoff JP, et al. Child-specific risk factors and patient safety. *J Patient Saf.* 2005;1:17–22.
- 18  
19 ~~32.~~ ~~Incidence of harm to children due to failure to monitor.~~ ~~31.~~ *NHS Outcomes Framework 2012/13, Technical details of indicators, section 5.*  
20 ~~2011: Section 5.6. Department of Health Gateway reference 16886. 92~~  
21 ~~[https://www.gov.uk/government/uploads/system/uploads/attachment\\_data/file/213713/dh\\_131721.pdf](https://www.gov.uk/government/uploads/system/uploads/attachment_data/file/213713/dh_131721.pdf) (accessed 25 May 2014)~~
- 22  
23 ~~3332.~~ Lemon V, Stockwell DC. Automated Detection of Adverse Events in Children. *Pediatr Clin North Am.* 2012;59(6):1269–78.
- 24  
25 ~~3433.~~ Solberg, L.L., Mosser, G., McDonald, S. (1997). Three faces of Performance measurement. *Journal of Quality Improvement.* 1997;23(3):  
26 ~~p.~~ 135-47.
- 27  
28 ~~3534.~~ Landrigan, CP, Parry GJ, Bones, CB, Hackbarth AD, Goldmann, DA, Sharek PJ et al. Temporal Trends in Rates of Patient Harm Resulting  
29 from Medical Care. *N Engl J Med* 2010;363:2124-2134.
- 30  
31 ~~3635.~~ Parry GJ, Cline, A, Goldmann DA. Deciphering Harm Measurement. *JAMA.* 2012;307(20):2155-2156.

- Formatted:** Font: Arial, 11 pt

# PAEDIATRIC TRIGGER TOOL

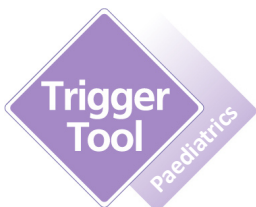

Patient Age  years, months

Date Of Discharge:

Length Of Stay:  days

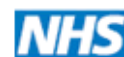

Institute for Innovation and Improvement

|      | Full Description                                                                  | Trigger                                            | Adverse Event                                      | Severity of Adverse Event | Comment on this trigger |
|------|-----------------------------------------------------------------------------------|----------------------------------------------------|----------------------------------------------------|---------------------------|-------------------------|
| PG1  | EWS or baseline obs missing or incomplete OR score/observation requiring response | <input type="radio"/> No <input type="radio"/> Yes | <input type="radio"/> No <input type="radio"/> Yes | N/A E F G H I             |                         |
| PG2  | Tissue damage or pressure ulcer                                                   | <input type="radio"/> No <input type="radio"/> Yes | <input type="radio"/> No <input type="radio"/> Yes | N/A E F G H I             |                         |
| PG3  | Readmission to hospital within 30 days                                            | <input type="radio"/> No <input type="radio"/> Yes | <input type="radio"/> No <input type="radio"/> Yes | N/A E F G H I             |                         |
| PG4  | Unplanned admissions                                                              | <input type="radio"/> No <input type="radio"/> Yes | <input type="radio"/> No <input type="radio"/> Yes | N/A E F G H I             |                         |
| PG5  | Cranial Imaging                                                                   | <input type="radio"/> No <input type="radio"/> Yes | <input type="radio"/> No <input type="radio"/> Yes | N/A E F G H I             |                         |
| PG6  | Respiratory/Cardiac arrest/crash call                                             | <input type="radio"/> No <input type="radio"/> Yes | <input type="radio"/> No <input type="radio"/> Yes | N/A E F G H I             |                         |
| PG7  | Diagnostic imaging for embolus/thrombus +/- confirmation                          | <input type="radio"/> No <input type="radio"/> Yes | <input type="radio"/> No <input type="radio"/> Yes | N/A E F G H I             |                         |
| PG8  | Complication of procedure or treatment                                            | <input type="radio"/> No <input type="radio"/> Yes | <input type="radio"/> No <input type="radio"/> Yes | N/A E F G H I             |                         |
| PG9  | Transfer to higher level of care (inc admission to specialist unit, ICU/HDU)      | <input type="radio"/> No <input type="radio"/> Yes | <input type="radio"/> No <input type="radio"/> Yes | N/A E F G H I             |                         |
| PG10 | Hypoxia O <sub>2</sub> sat <85%                                                   | <input type="radio"/> No <input type="radio"/> Yes | <input type="radio"/> No <input type="radio"/> Yes | N/A E F G H I             |                         |
| PG11 | Cancelled elective procedure/ delayed discharge                                   | <input type="radio"/> No <input type="radio"/> Yes | <input type="radio"/> No <input type="radio"/> Yes | N/A E F G H I             |                         |
| PS1  | Return to theatre                                                                 | <input type="radio"/> No <input type="radio"/> Yes | <input type="radio"/> No <input type="radio"/> Yes | N/A E F G H I             |                         |
| PS2  | Change in planned procedure                                                       | <input type="radio"/> No <input type="radio"/> Yes | <input type="radio"/> No <input type="radio"/> Yes | N/A E F G H I             |                         |
| PS3  | Surgical site infection                                                           | <input type="radio"/> No <input type="radio"/> Yes | <input type="radio"/> No <input type="radio"/> Yes | N/A E F G H I             |                         |
| PS4  | Removal/Injury or repair of organ                                                 | <input type="radio"/> No <input type="radio"/> Yes | <input type="radio"/> No <input type="radio"/> Yes | N/A E F G H I             |                         |
| IP1  | Readmission to ICU or HDU                                                         | <input type="radio"/> No <input type="radio"/> Yes | <input type="radio"/> No <input type="radio"/> Yes | N/A E F G H I             |                         |

**Adverse Event Score (Measure of Harm)**

- E** Temporary harm to the patient and required intervention
- F** Temporary harm to the patient and required initial or prolonged hospitalisation
- G** Permanent patient harm
- H** Intervention required to sustain life
- I** Patient death

For peer review only - <http://bmjopen.bmj.com/site/about/guidelines.xhtml>

Full Description

Trigger

Adverse Event

Open BMJ Open  
Verity of Adverse Event

Comment on this trigger

|      |                                                    |                                                    |                                                    |     |                         |                         |                         |                         |                         |
|------|----------------------------------------------------|----------------------------------------------------|----------------------------------------------------|-----|-------------------------|-------------------------|-------------------------|-------------------------|-------------------------|
| PM1  | Vitamin K given (except for routine neonatal dose) | <input type="radio"/> No <input type="radio"/> Yes | <input type="radio"/> No <input type="radio"/> Yes | N/A | <input type="radio"/> E | <input type="radio"/> F | <input type="radio"/> G | <input type="radio"/> H | <input type="radio"/> I |
| PM2  | Naloxone given                                     | <input type="radio"/> No <input type="radio"/> Yes | <input type="radio"/> No <input type="radio"/> Yes | N/A | <input type="radio"/> E | <input type="radio"/> F | <input type="radio"/> G | <input type="radio"/> H | <input type="radio"/> I |
| PM3  | Flumazenil given                                   | <input type="radio"/> No <input type="radio"/> Yes | <input type="radio"/> No <input type="radio"/> Yes | N/A | <input type="radio"/> E | <input type="radio"/> F | <input type="radio"/> G | <input type="radio"/> H | <input type="radio"/> I |
| PM4  | Glucagon or glucose ≥ 10% given                    | <input type="radio"/> No <input type="radio"/> Yes | <input type="radio"/> No <input type="radio"/> Yes | N/A | <input type="radio"/> E | <input type="radio"/> F | <input type="radio"/> G | <input type="radio"/> H | <input type="radio"/> I |
| PM5  | Chlorphenamine given                               | <input type="radio"/> No <input type="radio"/> Yes | <input type="radio"/> No <input type="radio"/> Yes | N/A | <input type="radio"/> E | <input type="radio"/> F | <input type="radio"/> G | <input type="radio"/> H | <input type="radio"/> I |
| PM6  | Anti-emetic given                                  | <input type="radio"/> No <input type="radio"/> Yes | <input type="radio"/> No <input type="radio"/> Yes | N/A | <input type="radio"/> E | <input type="radio"/> F | <input type="radio"/> G | <input type="radio"/> H | <input type="radio"/> I |
| PM7  | IV Bolus ≥ 10ml/kg colloid or crystalloid given    | <input type="radio"/> No <input type="radio"/> Yes | <input type="radio"/> No <input type="radio"/> Yes | N/A | <input type="radio"/> E | <input type="radio"/> F | <input type="radio"/> G | <input type="radio"/> H | <input type="radio"/> I |
| PM8  | Abrupt medication stop                             | <input type="radio"/> No <input type="radio"/> Yes | <input type="radio"/> No <input type="radio"/> Yes | N/A | <input type="radio"/> E | <input type="radio"/> F | <input type="radio"/> G | <input type="radio"/> H | <input type="radio"/> I |
| PL15 | Thrombocytopenia (<100)                            | <input type="radio"/> No <input type="radio"/> Yes | <input type="radio"/> No <input type="radio"/> Yes | N/A | <input type="radio"/> E | <input type="radio"/> F | <input type="radio"/> G | <input type="radio"/> H | <input type="radio"/> I |
| PL1  | High INR (>5) or APTT > 100 sec                    | <input type="radio"/> No <input type="radio"/> Yes | <input type="radio"/> No <input type="radio"/> Yes | N/A | <input type="radio"/> E | <input type="radio"/> F | <input type="radio"/> G | <input type="radio"/> H | <input type="radio"/> I |
| PL2  | Transfusion                                        | <input type="radio"/> No <input type="radio"/> Yes | <input type="radio"/> No <input type="radio"/> Yes | N/A | <input type="radio"/> E | <input type="radio"/> F | <input type="radio"/> G | <input type="radio"/> H | <input type="radio"/> I |
| PL3  | Abrupt drop in Hb or Hct (>25%)                    | <input type="radio"/> No <input type="radio"/> Yes | <input type="radio"/> No <input type="radio"/> Yes | N/A | <input type="radio"/> E | <input type="radio"/> F | <input type="radio"/> G | <input type="radio"/> H | <input type="radio"/> I |
| PL4  | Rising urea or creatinine (>2x baseline)           | <input type="radio"/> No <input type="radio"/> Yes | <input type="radio"/> No <input type="radio"/> Yes | N/A | <input type="radio"/> E | <input type="radio"/> F | <input type="radio"/> G | <input type="radio"/> H | <input type="radio"/> I |
| PL5  | Na <sup>+</sup> <130 or >150                       | <input type="radio"/> No <input type="radio"/> Yes | <input type="radio"/> No <input type="radio"/> Yes | N/A | <input type="radio"/> E | <input type="radio"/> F | <input type="radio"/> G | <input type="radio"/> H | <input type="radio"/> I |
| PL6  | K <sup>+</sup> <3.0 or >6.0                        | <input type="radio"/> No <input type="radio"/> Yes | <input type="radio"/> No <input type="radio"/> Yes | N/A | <input type="radio"/> E | <input type="radio"/> F | <input type="radio"/> G | <input type="radio"/> H | <input type="radio"/> I |
| PL7  | Hypoglycaemia (<3mmol/l)                           | <input type="radio"/> No <input type="radio"/> Yes | <input type="radio"/> No <input type="radio"/> Yes | N/A | <input type="radio"/> E | <input type="radio"/> F | <input type="radio"/> G | <input type="radio"/> H | <input type="radio"/> I |
| PL8  | Hyperglycaemia (>12mmol/l)                         | <input type="radio"/> No <input type="radio"/> Yes | <input type="radio"/> No <input type="radio"/> Yes | N/A | <input type="radio"/> E | <input type="radio"/> F | <input type="radio"/> G | <input type="radio"/> H | <input type="radio"/> I |
| PL9  | Drug level out of range                            | <input type="radio"/> No <input type="radio"/> Yes | <input type="radio"/> No <input type="radio"/> Yes | N/A | <input type="radio"/> E | <input type="radio"/> F | <input type="radio"/> G | <input type="radio"/> H | <input type="radio"/> I |
| PL10 | MRSA bacteraemia                                   | <input type="radio"/> No <input type="radio"/> Yes | <input type="radio"/> No <input type="radio"/> Yes | N/A | <input type="radio"/> E | <input type="radio"/> F | <input type="radio"/> G | <input type="radio"/> H | <input type="radio"/> I |
| PL11 | C. difficile                                       | <input type="radio"/> No <input type="radio"/> Yes | <input type="radio"/> No <input type="radio"/> Yes | N/A | <input type="radio"/> E | <input type="radio"/> F | <input type="radio"/> G | <input type="radio"/> H | <input type="radio"/> I |
| PL12 | Vanc resistant enterococcus                        | <input type="radio"/> No <input type="radio"/> Yes | <input type="radio"/> No <input type="radio"/> Yes | N/A | <input type="radio"/> E | <input type="radio"/> F | <input type="radio"/> G | <input type="radio"/> H | <input type="radio"/> I |
| PL13 | Nosocomial pneumonia                               | <input type="radio"/> No <input type="radio"/> Yes | <input type="radio"/> No <input type="radio"/> Yes | N/A | <input type="radio"/> E | <input type="radio"/> F | <input type="radio"/> G | <input type="radio"/> H | <input type="radio"/> I |
| PL14 | Positive Blood Culture                             | <input type="radio"/> No <input type="radio"/> Yes | <input type="radio"/> No <input type="radio"/> Yes | N/A | <input type="radio"/> E | <input type="radio"/> F | <input type="radio"/> G | <input type="radio"/> H | <input type="radio"/> I |
| PO1  | Other (specify)                                    | <input type="radio"/> No <input type="radio"/> Yes | <input type="radio"/> No <input type="radio"/> Yes | N/A | <input type="radio"/> E | <input type="radio"/> F | <input type="radio"/> G | <input type="radio"/> H | <input type="radio"/> I |

TOTALS

For peer review only - <http://bmjopen.bmj.com/site/about/guidelines.xhtml>

Completed portal entry



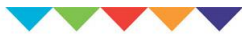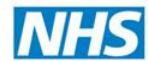

*Institute for Innovation  
and Improvement*

# The Paediatric Trigger Tool

## User guide

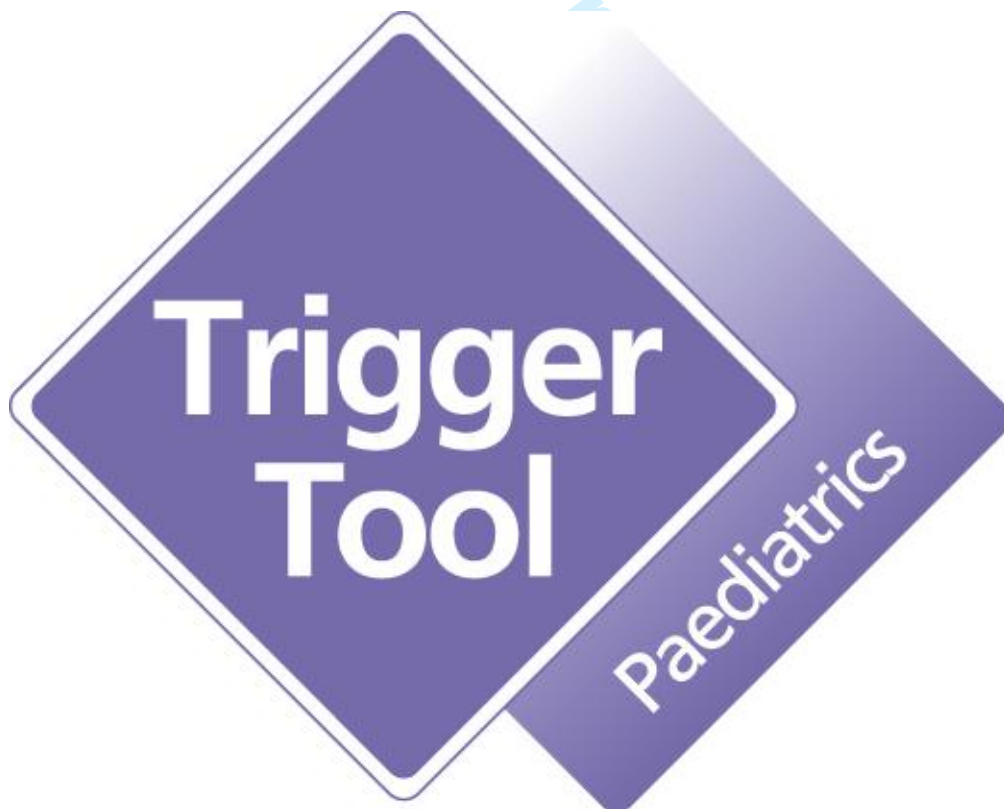

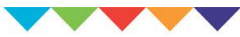

## Contents:

### Acknowledgements

### Introduction

1. What is the Paediatric Trigger Tool?
2. Why use it?
3. 7-step user guide
4. Trigger definitions
5. Further help and support

Incident reporting typically identifies 5-10% of harm events.

Trigger Tools typically detect harm rates in excess of 30%.

Together, these two diagnostic measures can help you focus your improvement work to reduce your rate of harm.

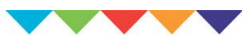

## Acknowledgements

With the support of clinicians in nine hospitals across the UK, we have developed the UK paediatric trigger tool in order to detect adverse events in paediatric care provided in district general hospitals, acute teaching hospitals and specialist paediatric centres.

This work has built on the original work of the Institute for Healthcare Improvement, in developing the Global Trigger Tool™ for use in adults, the Acute Trigger Tool an adaption for use in UK Hospitals, and original research led by Professor Anne Matlow to develop a Canadian Paediatric Trigger Tool.

We would like to acknowledge the following who were involved in the co-production of the UK Paediatric Trigger Tool:

Dr Peter Lachman, Great Ormond Street Hospital for Children NHS Trust

Dr Derek Burke, Medical Director, John Reid, Director of Nursing, and Dr Janet Cumberland, Clinical Associate, from Sheffield Children's NHS Foundation Trust.

Clinicians from the following Hospitals:

### England

- Alder Hey Children's NHS Foundation Trust
- Birmingham Children's Hospital NHS Foundation Trust
- Great Ormond Street Hospital for Children NHS Trust
- Royal Manchester Children's Hospital, part of Central Manchester University Hospitals NHS Foundation Trust
- Sheffield Children's NHS Foundation Trust
- The Royal Free Hospital NHS Trust
- University Hospital Bristol NHS Foundation Trust

### Scotland

- NHS Greater Glasgow & Clyde
- Royal Hospital for Sick Children, Edinburgh

IHI Global Trigger Tool for Measuring Adverse Events was developed by IHI. "Global Trigger Tool" is a common law trademark of the Institute for Healthcare Improvement.

The Acute Trigger Tool is the approved UK version of IHI Global Trigger Tool.™

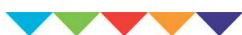

## Introduction

Welcome to the **Paediatric Trigger Tool (PTT) User's Guide**. Produced by the Safer Care Team at the NHS Institute for Innovation and Improvement, it is a practical guide to support anyone who is using, or thinking about using, the PTT.

The guide is arranged in five sections:

- |                                         |          |
|-----------------------------------------|----------|
| 1. What is the Paediatric Trigger Tool? | page: 4  |
| 2. What are the benefits of using it?   | page: 6  |
| 3. 7-step user guide                    | page: 8  |
| 4. Trigger definitions                  | page: 14 |
| 5. Further help and support             | page: 21 |

**Complete newcomers** to the Paediatric Trigger Tool may want to learn more about what the PTT is (and isn't), and what benefits it can bring.

- ▶ See Sections 1 and 2

**Teams about to go live with the tool** for the first time will benefit from the '7-step user guide'.

- ▶ See Section 3

**Those already using the PTT** may just want to use the 'Trigger definitions' to check or refresh their understanding of the triggers and what to look out for in case note reviews.

- ▶ See Section 4

'It pulls back the curtain to show us where the major problems really are'

Trigger Tool user

# 1. What is the Paediatric Trigger Tool?

The Paediatric Trigger Tool (PTT) is a rapid, structured case note review tool to help you measure the rate of harm in your organisation. It provides paediatric teams with an unbiased measure of the incidence of iatrogenic harm experienced by their patients (ie harm caused by medical care).

Most importantly, the PTT allows you to prioritise your safety improvement activity and track these improvements over time.

Co-produced by the NHS Institute's Safer Care Team and NHS clinicians, the PTT draws on the large and growing body of research and evidence exploring the benefits of trigger tool methodology<sup>1</sup>.

And now, the PTT is also supported by the NHS Institute's **Trigger Tool Portal** – an easy-to-use, web-based facility that allows you to capture, automatically analyse and present the valuable data generated through using the trigger tool. There is more about the Trigger Tool Portal in **Section 3. '7-step user guide'**.

## What it isn't...

The Paediatric Trigger Tool is **not** a benchmarking tool for making comparisons between paediatric teams or trusts. This is because:

- Counting adverse events relies on a series of clinical judgements by individual clinical reviewers. While use of the trigger tool methodology has been shown to enhance reliability between reviewers at organisational level, this does not extend to comparisons between reviewers in different organisations - except in the most highly-controlled situations (eg controlled trials).
- The adverse event rate in any given healthcare team will be influenced by a number of important factors outside the control of that team, such as patients' health and social status and local provision of other health and social care services.

As a quantitative tool, the PTT does not help you understand the detailed causes of specific adverse events. For this, we recommend using the PTT alongside other incident analysis techniques and other sources of information about patient safety - eg staff reports and patient complaints or comments.

<sup>1</sup> Resar RK, Rozich JD, Classen D. Methodology and rationale for the measurement of harm with trigger tools. *Quality and Safety in Health Care*. 2003; 12; Suppl 2:39-45.

'The PTT brings highly-sensitive and specific adverse event measurement within reach of every paediatric team'



### How does it work?

The PTT uses random sampling and rapid, structured case note review to bring very sensitive and specific adverse event measurement within reach of every paediatric team. Each review should take a maximum of 20 minutes per patient, and often less.

The object of the review is to identify harm – not to determine whether the event was preventable.

In our experience, the discussion about the **preventability** of an adverse event is often a barrier to determining the **cause** of an adverse event.

The full detail of how the PTT works is set out in **Section 3: 7-step user guide**. In essence, though, the process involves four key stages:

- I. A structured manual review of each case note (patient record), looking for any of the triggers listed in the tool – eg INR level greater than 5.
- II. Where a positive trigger is identified, carrying out a closer examination of the case notes to determine whether an adverse event has occurred – eg bleeding or haematoma.
- III. Where an adverse event has occurred **and** harm has resulted, assigning a category of harm based on the National Coordinating Council for Medication Error Reporting and Prevention (NCC MERP) Index for Categorising Errors.
- IV. Capturing the data using the NHS Institute's Trigger Tool Portal and reviewing the analysis of harm generated by the case note reviews.

#### What defines an 'adverse event'?

The Paediatric Trigger Tool defines an adverse event as any physical harm to the patient (limiting the scope to physical rather than emotional harm).

However, a question many users have found useful in identifying an adverse event is: '**Would you be happy if the event happened to you or to your child?**' If the answer is no, then it probably is an adverse event.

The next question would be whether the event was part of the natural progression of the disease, or a complication of the treatment related to the disease process.

Admittedly the decision at times will be difficult and subjective, but experience has found the process to be reliable.

## 2. Why use it?

Traditional efforts to detect adverse events (AEs) have focused on voluntary reporting and tracking of errors. However, public health researchers have established that only 10 to 20% of errors are ever reported and, of those, 90 to 95% cause no harm to patients<sup>2</sup>.

In order to select and test the changes that will reduce harm and improve safety and reliability, hospitals and healthcare teams need a more effective way to identify events that do cause harm to patients.

The use of triggers to identify adverse events from a manual case note review has been used extensively in the UK and elsewhere to measure the overall level of harm in a healthcare organisation.

Recognising the potential of the methodology, the NHS Institute for Innovation and Improvement is developing a suite of trigger tools for the UK to measure harm in paediatrics, primary care, mental health, community hospitals and in the community.

### What is a trigger?

The Paediatric Trigger Tool is made up of a series of triggers grouped together to reflect different aspects or components of care. The groupings used in the PTT reflect five broad aspects of care in a child's hospital stay:

1. general care
2. surgical care
3. intensive care
4. medication
5. laboratory tests.

The trigger is a signpost, or clue, to help the reviewer find any adverse events that have resulted from any medical care provided.

#### For example...

An INR > 5 is not an adverse event in its own right, as the patient has not been harmed by it (even though it is unwanted). The majority of patients whose INR is over 5 do not suffer an adverse event as actions are taken to normalise the result. However, a patient with an INR over 5 who suffered a bleeding event has suffered an adverse event linked to that trigger.

The role of the INR trigger is to identify patients who through drug treatment are over anti-coagulated – these patients have a higher chance of suffering an adverse event. The level of 5 is chosen as the use of a lower level such as 4 would lead to the trigger being less sensitive in identifying an adverse event (ie the trigger would be identified frequently and lead to a detailed note review, but with few adverse events detected). This would make the tool much less efficient.

<sup>2</sup> Sari A, Sheldon TA, Cracknell A, Turnbull A. Sensitivity of routine system for reporting safety incidents in an NHS hospital: retrospective patient case note review. *BMJ*. 2007 doi: 10.1136/bmj.39031.507153.AE <http://www.bmj.com/cgi/content/abstract/334/7584/79>

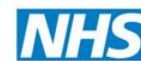

## Institute for Innovation and Improvement

By themselves triggers are not adverse events. Their purpose is to allow the case note review to be completed fast enough to be feasible in everyday practice, while remaining reliable enough to pick up adverse events in the case notes and full patient record.

### What benefits will come from using the tool?

These are just some of the benefits you can expect to gain through using the PTT:

- The PTT can **re-ignite** staff's passion and enthusiasm for improving the quality and safety of care they deliver to their patients.
- Having an internal, confidential and non-benchmarking tool allows paediatric teams to be **open and honest** about their overall rate of harm. The PTT is not about attributing blame, but wholly about safety improvement.
- Trigger methodology is a **tested and validated** tool for measuring harm and tracking improvements in patient safety. It is a valuable partner to other techniques for understanding threats to patient safety, including staff reporting and patient complaints.
- Safer care is **better for everyone**. Reducing harm results in safer care for the patient; improved professional satisfaction for clinicians; and less waste of healthcare resources.

#### Before you get started...

The following section takes you through the 7-step PTT process. But before you get started for the first time, you and your review team should ideally have had some initial training in case note review and trigger tool methodology.

This does not have to be onerous and we suggest participation in programmes or online tutorials listed on our web site at:

[www.institute.nhs.uk/triggertool](http://www.institute.nhs.uk/triggertool)



### 3. 7-step user guide

#### Step 1: Select your reviewers

The review team should consist of two reviewers and a doctor who have been trained in case note review and trigger tool methodology. The two initial reviewers should also have extensive experience of paediatric care, and may include nurses and pharmacists. A paediatrician is needed to concur with the identification and severity of the adverse event, and to lead discussions regarding adverse events with other doctors in the organisation. The paediatrician will also play a lead role in supporting the reviewers during the training phase as this helps to improve inter-reviewer reliability.

- ✓ **TIP:** Reviewers may need to negotiate protected time to carry out the reviews. A sample business case is available at [www.institute.nhs.uk/paeds](http://www.institute.nhs.uk/paeds). In paediatrics, it is not generally possible to undertake the type of mortality review that is generated before commencing acute adult trigger tool programmes. You will need to review a baseline of 20 records to start with and then 20 per month thereafter. This can be split into 10 records, twice a month if necessary. Remember, reviewers will need 20 minutes for each review; time to discuss the findings; time for data input; and time to prepare data presentations.

#### Step 2: Select your case notes

It is critical to select the initial case notes in a truly random fashion. You can use any method, as long as it is random and the patients selected have a minimum LOS (length of stay) of at least eight hours (currently under review). Case notes should be selected at least 30 days after discharge. This is because one of the triggers (readmitted within 30 days of discharge) cannot otherwise be determined.

So what makes a selection process random? A selection process is random as long as every case note has an equal opportunity of being chosen.

- ✓ **TIP:** One method might include generating random numbers between one and nine and selecting 10 patient records that end in the random number.
- ✓ **TIP:** Alternatively, you could print out all discharges (if deaths are included) and select every 10th case note for review.
- ✓ **TIP:** It is also useful to pull all prior case notes for the selected patients, allowing the reviewer to see any readmissions.

Once you know how you want to randomise your notes, you need to decide how you will get them. Will you approach your medical records department, or do you have a data clerk or secretary who can pull the notes for you?

- ✓ **TIP:** Select more than 20 cases as some notes will be unavailable – but do check that lack of availability does not result in the sample being skewed over time (eg notes for frequently-seen children may always be in the ‘pending’ tray in preparation for a clinic appointment, and never therefore sampled).



## Institute for Innovation and Improvement

### Step 3: Start reviewing

You will find an example of the **PTT worksheet** at the back of this guide. Hard copies (pdf files) can also be downloaded from our web site [www.institute.nhs.uk/paeds](http://www.institute.nhs.uk/paeds) or viewed on the **NHS Trigger Tool Portal**. Alternatively, you may find it easier to input the data directly into the **NHS Trigger Tool Portal**. To use the Trigger Tool Portal see page 12.

Whichever way you access it, you will need to complete a separate worksheet for each case note and you will need to review a minimum of 20 records per month thereafter.

- ✓ **TIP:** These reviews can be split into two sessions to be more resource friendly.

You should review only 'completed' case notes (those that have been processed and include the discharge summary and all diagnosis and procedure coding).

And, each case note should be reviewed for a maximum review time of 20 minutes. Less than 20 minutes is fine, but never more than 20 minutes.

- ✓ **TIP:** When you start out, both reviewers may wish to review the same set of notes independently for the first 20 patient records, and then discuss their findings with the paediatrician. This helps ensure the reviewers are thinking and working in a broadly similar way, thus establishing inter-reviewer reliability more quickly.

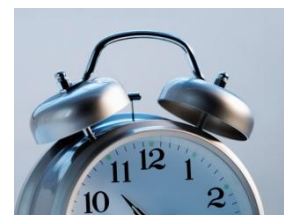

### Step 4: Follow a consistent process

The case note review process should be consistent. The following pathway might be useful to follow:

- Discharge diagnoses (looking particularly for infections, complications or certain diagnoses).
- Discharge summary (looking for specifics of the assessment and treatment during the hospital stay).
- Medication orders and the medication administration documentation form.
- ✓ **TIP:** If your organisation uses electronic prescribing, download the prescription forms beforehand or arrange to have direct screen access.
- Laboratory results
- ✓ **TIP:** Again, if you use electronic reporting, download the reports beforehand or arrange to have direct screen access.
- Operative theatre documentation
- Nursing documentation.
- Physician case notes.
- If time permits, any other areas of the case notes.



## Step 5: Find the positive triggers

As a minimum, all reviews should involve looking for triggers in the PTT's **General Care**, **Laboratory Test** and **Medication** components. The other components should only be used if applicable; for example, the **Intensive Care** component should be used when reviewing a chart for a patient who spent any days in an intensive care unit.

The new **NHS Trigger Tool Portal** (see 'Step 7') allows you to customise the review process and specify your own additional triggers. This is only advisable once you've gained more experience in trigger tool methodology and use within your organisation.

'A positive trigger is not an adverse event in itself; it is just a clue that one may have occurred'

A positive trigger is the presence of that item (eg INR level greater than 5). However, a positive trigger is not an adverse event in itself; it is just a clue that one may have occurred.

When you find a positive trigger, tick 'Yes' against it on the worksheet and then review the relevant portion of the case note to determine whether an adverse event has occurred. In the example of INR greater than 5, the reviewer should look for bleeding, decreased haemoglobin, haematoma and other adverse events that can result from over-anticoagulation.

- ✓ **TIP:** The object is not to find every possible adverse event in every case note you review. The tool is designed to produce a reliable sample that is sufficient to inform safety improvements in the hospital.

If no adverse event is found, move on and continue looking for other triggers.

- ✓ **TIP:** Be sure to include every adverse event you find, even if not identified by a trigger. Occasionally, you will come across an adverse event while looking for triggers or other details. All adverse events should be included and there is a component on the **PTT worksheet** to accommodate this (see PO1 'Other' at the bottom of the worksheet).

Where you do find evidence of an adverse event, tick 'Yes' on the worksheet in corresponding column.

Next you need to assign a **category of harm** using the NCC MERP Index categories listed in the tool and shown in the table below.



## Step 6: Assign a 'category of harm'

The PTT uses an adapted version of the National Coordinating Council for Medication Error Reporting and Prevention (NCC MERP) 'Index for Categorising Errors'. However, the

Paediatric Trigger Tool counts *any* adverse events causing harm to the patient, whether or not they are the result of an error.

Accordingly, the PTT excludes the first four categories in the NCC MERP Index because they describe medication errors that **do not** cause harm. The PTT does include categories E, F, G, H, and I of the index because these categories describe errors that **do** cause harm.

If an adverse event has occurred, but no harm has resulted then tick the N/A (not applicable) box.

| Category | Description                                                                     |
|----------|---------------------------------------------------------------------------------|
| E        | Temporary harm to the patient and required intervention                         |
| F        | Temporary harm to the patient and required initial or prolonged hospitalisation |
| G        | Permanent patient harm                                                          |
| H        | Intervention required to sustain life                                           |
| I        | Patient death                                                                   |

The review team will need to establish their own process if serious harm is identified, particularly where this has not previously come to the attention of clinicians and managers. The tool is not designed to establish accountability for error or harm. There are other tools such as the **National Patient Safety Agency (NPSA) Incident Decision Tree** or **Root Cause Analysis Toolkit** that provide useful frameworks for exploring and learning from incidents.

- ▶ Find both resources on the NPSA website at:
  - <http://www.npsa.nhs.uk/nrls/improvingpatientsafety/patient-safety-tools-and-guidance/incidentdecisiontree/>
  - <http://www.nrls.npsa.nhs.uk/resources/?entryid45=59847&>

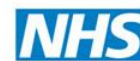

**Institute for Innovation and Improvement**

## Step 7: Capture and view your data via the NHS Trigger Tool Portal

After all case notes have been reviewed, you can then calculate the overall rate of harm. You can do this manually, but it is easier to use the new NHS Institute's **Trigger Tool Portal** [www.institute.nhs.uk/triggertoolportal](http://www.institute.nhs.uk/triggertoolportal).

Co-designed by the NHS Institute's Safer Care Team and practicing paediatricians, the portal (shown below) allows you to capture and analyse the harm data generated from your case note reviews. Using it regularly will allow you to see whether your service is getting safer and more reliable.

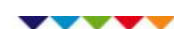

### PAEDIATRIC TRIGGER TOOL

[www.institute.nhs.uk/safecare/portal](http://www.institute.nhs.uk/safecare/portal)

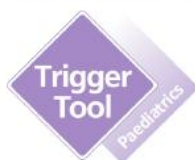

Patient Age:  years, months  
 Date Of Discharge:   
 Length Of Stay:  days

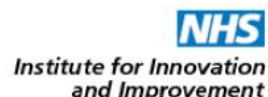

|         | Full Description                                                                      | Trigger                                                       | Adverse Event                                                 | Severity of Adverse Event | Comment on this trigger |
|---------|---------------------------------------------------------------------------------------|---------------------------------------------------------------|---------------------------------------------------------------|---------------------------|-------------------------|
| General | PG1 EWS or baseline obs missing or incomplete OR score/observation requiring response | <input type="radio"/> No <input checked="" type="radio"/> Yes | <input type="radio"/> No <input checked="" type="radio"/> Yes | N/A E F G H I             |                         |
|         | PG2 Tissue damage or pressure ulcer                                                   | <input type="radio"/> No <input checked="" type="radio"/> Yes | <input type="radio"/> No <input checked="" type="radio"/> Yes | N/A E F G H I             |                         |
|         | PG3 Readmission to hospital within 30 days                                            | <input type="radio"/> No <input checked="" type="radio"/> Yes | <input type="radio"/> No <input checked="" type="radio"/> Yes | N/A E F G H I             |                         |
|         | PG4 Unplanned admissions                                                              | <input type="radio"/> No <input checked="" type="radio"/> Yes | <input type="radio"/> No <input checked="" type="radio"/> Yes | N/A E F G H I             |                         |
|         | PG5 Cranial Imaging                                                                   | <input type="radio"/> No <input checked="" type="radio"/> Yes | <input type="radio"/> No <input checked="" type="radio"/> Yes | N/A E F G H I             |                         |
|         | PG6 Respiratory/Cardiac arrest/crash call                                             | <input type="radio"/> No <input checked="" type="radio"/> Yes | <input type="radio"/> No <input checked="" type="radio"/> Yes | N/A E F G H I             |                         |
|         | PG7 Diagnostic imaging for embolus/thrombus +/- confirmation                          | <input type="radio"/> No <input checked="" type="radio"/> Yes | <input type="radio"/> No <input checked="" type="radio"/> Yes | N/A E F G H I             |                         |
|         | PG8 Complication of procedure or treatment                                            | <input type="radio"/> No <input checked="" type="radio"/> Yes | <input type="radio"/> No <input checked="" type="radio"/> Yes | N/A E F G H I             |                         |
|         | PG9 Transfer to higher level of care (inc admission to specialist unit, ICU/ HDU)     | <input type="radio"/> No <input checked="" type="radio"/> Yes | <input type="radio"/> No <input checked="" type="radio"/> Yes | N/A E F G H I             |                         |

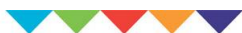

# Institute for Innovation and Improvement

The Trigger Tool Portal is easy to use and puts you in complete control of your data. It also enables you to drill down and identify the prevalence of specific triggers or groups of triggers. This unique analysis capability will help you focus your service improvement efforts where they're needed most.

The portal will also automatically generate SPC (statistical process control) charts and other visual data charts to help you understand and communicate your results. These can be easily exported into your own reports and presentations – giving you a powerful new tool to engage others in your safety improvement work, and prove progress.

- Find out more about the **NHS Trigger Tool Portal** and how to register at: <http://www.institute.nhs.uk/triggertoolportal>

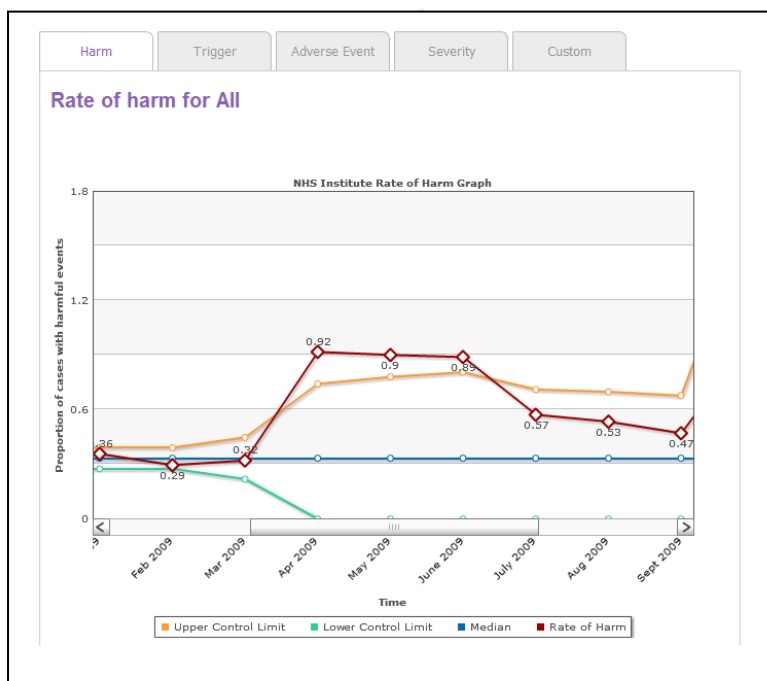

The Trigger Tool Portal will automatically generate charts like these – helping you understand, illustrate and communicate your data.

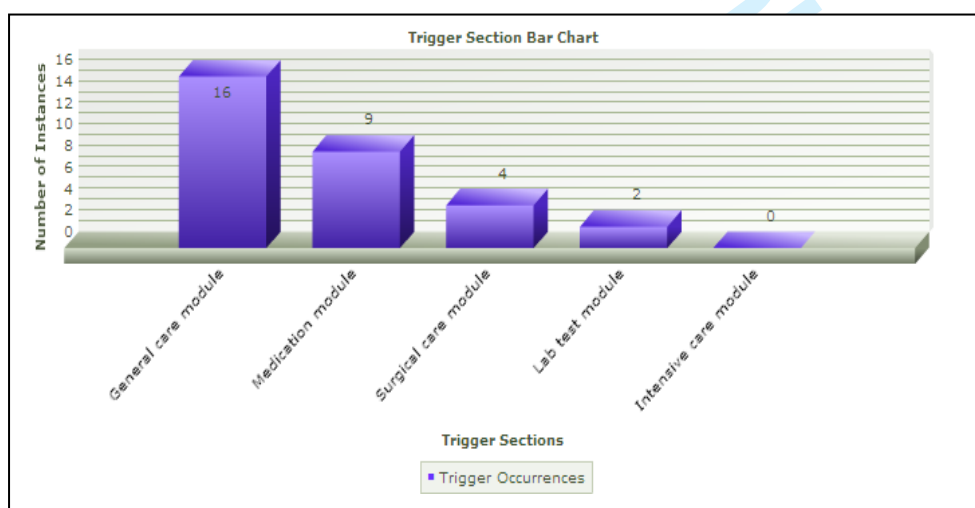



## 4. Trigger definitions

This section lists all the triggers used in the five components of the PTT, giving a brief explanation of why each may indicate an adverse incident and what to look out for during your reviews.

### General care component

#### PG1 Early warning score

If an early warning scoring risk or standard baseline observation assessment system is in use, then the lack of a score or incomplete observations, or a score or observation requiring a response, may be a precursor to an adverse event. Note: if you do not use an early warning score, then consider adapting one from elsewhere.

#### PG2 Tissue damage or pressure ulcer

Tissue damage or pressure ulcer may be difficult to define. All children who are admitted to hospital and who have difficulty in turning will need to be assessed for pressure ulcers on admission and throughout their stay. Look for assessments and, in particular, look in nursing notes for comments on reddening of the skin and early development of tissue damage. Also look for tissue damage as a result of IV therapy.

#### PG3 Readmission within 30 days

An adverse event may not manifest itself until after the patient has been discharged from the hospital, especially if the length of stay is minimal. As the chart is reviewed, look to see if this admission was within 30 days of a previous hospitalisation. Or, did the current admission result in another future hospitalisation? Examples of adverse events may include surgical site infection, recurrent infections, relapses and ongoing seizures. This is easier to detect if all the patient's records are pulled along with the case note currently being reviewed.

#### PG4 Unplanned admission

Any unscheduled admission for a known or previously-diagnosed condition could be an indication of an adverse event. The fact that it was unscheduled may be as a result of sub-optimum treatment which would be considered as an adverse event. Consider the reason for the admission and whether it was related to an adverse event or not.

#### PG5 Abnormal cranial imaging

Any abnormal cranial imaging (including, but not limited to, cranial imaging with evidence of significant ischemia or grade 3-4 hemorrhage) may be the result of fluctuations in blood pressure, cardio-respiratory arrest, or electrolyte imbalances. The adverse event will be intra-ventricular hemorrhage. Congenital anomalies should not be considered as adverse events.

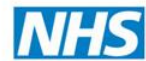

## *Institute for Innovation and Improvement*

### **PG6 Respiratory or cardiac arrest / crash calls**

All respiratory or cardiac arrests need to be carefully reviewed as they may represent the end event of a flawed care process. Not all crash calls are adverse events. However, cardiac or pulmonary arrest occurring intra-operatively, or in the post-anaesthesia care unit, should always be considered an adverse event. If these occur in the first 24 hours post-operatively, they are also very likely to be an adverse event. A sudden cardiac arrhythmia, with a resulting crash call, may well be associated with no adverse event. But failing to rescue a patient, due to lack of recognition of physiological change in signs and symptoms, would definitely be an adverse event.

### **PG7 Diagnostic imaging for embolus / thrombus +/- confirmation**

Development of a DVT or pulmonary embolism (PE) during a hospital stay should be considered as an adverse event. Even if all appropriate preventive measures appear to have been taken, from a patient's perspective this is a harmful event. If the hospitalisation occurs due to a DVT or emboli, look for drug-related or other cause (at previous admission or outside of the hospital).

### **PG8 Complication of procedure or treatment**

Evaluate the reason for the procedure. The procedure itself may be required due to an adverse event. Look for complications from any procedures. Procedure notes do not always note the complications, especially if the complication occurs hours or days after the procedure note has been documented.

### **PG9 Transfer to higher level of care (including specialist unit/ICU/HDU)**

Transfers include those that occur within hospital, to another hospital, or to your hospital from another. Transfer to an intensive care unit or high dependency unit, or step up to 'specialising' on the same ward, is a trigger that indicates an adverse event may have occurred. Admissions to intensive care or HDU, or the decision to give specific intensive nursing input on the same ward, may have occurred when a patient's clinical condition deteriorated, perhaps secondary to an adverse event.

When reviewing this trigger, look for the reasons for the transfer and the change in condition. For example, in the case of admission to intensive care following respiratory arrest and intubation, if the respiratory arrest was a natural progression of an exacerbation of chronic disease, it would not be an adverse event. But if it was caused by a post-operative event (eg a pulmonary embolus, or over-sedation) it would be an adverse event.

### **PG10 Hypoxia O<sub>2</sub> sat <85%**

Hypoxia that is not in keeping with the condition of the child (eg in congenital heart disease or chronic lung disease) could be an indication of an adverse event such as a cardiac or respiratory arrest.





### **PG11 Cancelled elective procedure / delayed discharge**

Cancellation of an elective procedure might indicate that the patient has experienced an adverse event that compromised their procedure. Alternatively, the patient may experience an adverse event as a result of waiting longer than planned for the procedure.

Delayed discharge for non-clinical reasons can result in an adverse event. This includes discharges to home or to another clinical area (eg a delay of six hours from the time of being classified as clinically fit for discharge home, due to waiting for medications to be released from pharmacy). Reviewers should agree what is reasonable for their organisation.

## **Surgical care component**

### **PS1 Return to theatre**

A return to surgery is a trigger and means you should check whether an adverse event occurred during the previous surgery.

An example of an adverse event is a patient who had internal bleeding following the first surgery and required a second surgery to stop the bleeding. Where patients have a second surgery that is exploratory, but does not reveal anything (looking for bleeding, or a suspected retained surgical instrument) this would still be considered an adverse event.

Sometimes a return to theatre after a previous surgical procedure is planned and is therefore not an adverse event. For example, a procedure that must be completed in stages, or a procedure that is completely unrelated to the first procedure, and the result of another diagnosis - such as pacemaker insertion after a bowel resection. It is important to distinguish whether the additional procedure was planned.

### **PS2 Change in planned procedure**

An unexpected change in surgical procedure can be the result of unexpected findings after the procedure has started; a change in clinical condition during the procedure; or an adverse event occurring during the procedure. When the procedure on the post-operative note is different from the procedure planned in the pre-operative note, or documented in the surgical consent, a reviewer should look for details as to why the change occurred.

An unexpected change in procedure, due to equipment failure or missing equipment, is an adverse event if the patient experienced additional pain, time in the hospital or other harm as a result of the different procedure.

### **PS3 Surgical site infection or hospital acquired urinary tract infection**

Surgical site infections are the second most common type of adverse events in adult hospitalised patients, increasing the length of stay and morbidity. (Few studies are available on children.) Look for any nosocomial infections, surgical site infections, or urinary tract infections. Any infection occurring in hospital is an adverse event. The infection may occur after discharge, so look at visits to the emergency department, community nursing, or outpatient visits.

**PS4 Removal / injury/ repair of organ**

Review theatre notes and post-operative notes for evidence that the procedure included repair, injury or removal of any organ. Except in cases of trauma, where organ injury or a suspicion of organ injury is the reason for surgery, this may indicate an operative event damaging the organ.

**Intensive care component****IP1 Readmission to Intensive Care or High Dependency Care**

Any readmission to the ICU indicates a high probability of an adverse event occurring on the ward or outside the hospital. Look for a relationship with an adverse event. Examples might be pulmonary oedema, secondary to excess fluid administration, or an aspiration.

**Medication component****PM1 Vitamin K (except for routine dose in neonates)**

If vitamin K was administered as a response to a prolonged INR, review the chart for evidence of bleeding. The laboratory reports should indicate a lowered haematocrit or presence of faecal occult blood (blood in stools). Check the progress notes for evidence of excessive bruising, gastrointestinal (GI) bleed, hemorrhagic stroke, large haematomas, or other bleeding episodes.

**PM2 Naloxone**

Naloxone is a powerful opiate antagonist. Determine why the drug was used. If it has been used because of opiate overdose or overuse, an adverse event has occurred.

**PM3 Flumazenil (Romazicon)**

Flumazenil reverses benzodiazepine drugs. Determine why the drug was used. If hypotension or marked, prolonged sedation occurred following benzodiazepine administration, an adverse event has occurred.

**PM4 Glucagon or glucose  $\geq$  10%**

The administration of glucagon or glucose  $\geq$  10% (oral or intravenous), may indicate that the patient has received too much or too little insulin or oral hypoglycemic. They may also have experienced symptoms as a result of this. Both the symptoms and the administration of additional medication are adverse events.

**PM5 Chlorphenamine or antihistamine**

Although frequently used for allergic reactions to drugs, these drugs can also be prescribed as a sleep aid, a pre-op/pre-procedure medication, or for seasonal allergies. If the drug has been administered, review the chart to determine if it was ordered for symptoms of an allergic reaction to a drug administered, either during the hospitalisation or before admission.


**PM6 Anti-emetics**

All administration of anti-emetics should be recorded as a trigger and professional judgment needs to be exercised to determine if an adverse event has occurred. Nausea and vomiting can be the result of drug toxicity or overdose, particularly in patients with impaired renal function. Some drugs, such as theophylline, frequently cause nausea and vomiting when levels are out of the therapeutic range. Anti-emetics are also commonly administered to patients post-operatively, or those receiving chemotherapy or PCA. Where these have not been administered in advance of nausea and vomiting, you may wish to consider this as an adverse event. In some instances, clinicians judge that potential side effects from prophylactic use of anti-emetics may outweigh the potential benefits and may not consider any resulting nausea or vomiting in these circumstances to be an adverse event.

**PM7 IV Bolus  $\geq 10\text{ml/kg}$  colloid or crystalloid given**

Administration of the colloid or crystalloid is an indication of possible collapse/shock and is an indication of a possible adverse event. It may be detected separately under PG6.

**PM8 Abrupt medication stop**

While some medication courses, such as antibiotics, are for a limited duration, the cessation of several medications at once, or cessation of a long-term medication (eg an antihypertensive) is a trigger requiring further investigation. It may indicate an adverse drug reaction, drug interaction, or sudden change in the patient's condition.

**Lab test component (Use the local laboratory upper limit for children)**
**Haematology**
**PL15 Thrombocytopenia (platelets  $<100$ )**

Abnormal coagulation or platelet counts (due to sepsis or ITP) that requires treatment with clotting products or platelet transfusions, may not be an adverse event as it is part of a pathological process. But if it is left untreated and the child suffers a bleed as a consequence, you should record an adverse event.

**PL1 High INR  $>5$  or aPTT  $>100$** 

Look for evidence of bleeding to determine if an adverse event has occurred. An elevated INR in itself is not an adverse event.

**PL2 Transfusion**

Procedures can require intra-operative transfusion of blood products for replacement of estimated blood lost, but this has become less common with 'bloodless surgery'. Any transfusion of packed red blood cells (RBCs), or whole blood, should be investigated for causation, including excessive bleeding, unintentional trauma of a blood vessel, etc. Transfusion of many units within the first 24 hours of surgery, including intra-operatively and post-operatively, will commonly be related to a peri-operative adverse event. Exceptions would be where excessive blood loss occurred pre-operatively. Fresh frozen plasma and platelets can reflect system problems that include failure to plan changes in anticoagulants prior to surgery, and the need to reverse quickly in order to carry out the surgery.



## Institute for Innovation and Improvement

### PL3 Abrupt drop in Hb or Hct (>25%)

Any drop of 25% or greater in Hb grams or Hematocrit (Hct) requires an explanation. All bleeding-associated events might commonly be identified by this trigger. Smaller 'drops' can obviously also be associated with adverse events, but the question as to whether harm has occurred needs to be answered subjectively. Anticoagulant use is frequently found to be associated with this particular trigger.

## Biochemistry

### PL4 Rising urea or creatinine (>2x baseline)

Review laboratory records for rising levels of either BUN or serum creatinine. If a change of two times greater than baseline levels is found, review medication administration records for medications known to cause renal toxicity. Review medical progress notes and the history, seeking physical and other causes of renal failure, such as pre-existing renal disease or diabetes that could have put the patient at greater risk of renal failure. If multiple factors are identified, subjective judgment may be needed to determine whether renal failure was an adverse event.

### PL5/PL6 Electrolyte abnormalities (Na+ <130 or >150, K+ <3.0 or >6.0)

Electrolyte imbalance can either precede or be associated with adverse events. Not all patients with electrolyte abnormalities will be symptomatic. Review the case notes for evidence of symptoms.

### PL7 Hypoglycaemia (<3mmol/l)

Not all patients will be symptomatic; if the patient is not symptomatic there is probably no adverse event. Review for associated use of insulin, or oral hypoglycemics with evidence of symptoms and commonly followed by administration of glucose (oral or intravenous). Signs and descriptions of symptoms such as lethargy, shakiness, etc, will be described by nurses in the notes.

### PL8 Hyperglycaemia (>12mmol/l)

Glucose greater than 12mmol/l requiring treatment in the non-diabetic could be the result of IV fluid/TPN error, nosocomial infection, steroid overdose, osmotic diuresis or sepsis - all of which are adverse events.

### PL9 Drug level out of range

Where a drug level has been taken and the result is a subtherapeutic level or a toxic level, this may imply harm to the patient. For example, a subtherapeutic level of an anticonvulsant may result in the patient having seizures and may be due to poor management of, or compliance with, treatment. A toxic level of an antibiotic, such as gentamicin, may result in renal failure or deafness. A toxic level of paracetamol may result in acute liver damage and death.

These may be due to a drug interaction that alters the metabolism of a drug; the prescription of an incorrect dose; or lack of recognition of impending organ failure which would have required a lower dosage of drug to be prescribed. If a patient has recently started a drug



which takes a while to achieve steady state, then subtherapeutic levels may be an expected part of monitoring, and would not necessarily imply harm. This should be at the discretion of the reviewer.

## Microbiology

### **PL10 MRSA bacteraemia**

Review for any positive MRSA bacteraemia.

### **PL11 C. difficile**

If a patient is on, or has been on, multiple antibiotics, this adverse event can be observed. A positive C. difficile result is an adverse event.

### **PL12 Vanc resistant enterococcus (VRE)**

Review for any nosocomial infections, central line infection, surgical site infection, or urinary tract infections. Any infection occurring in hospital is an adverse event. Exceptions might be the urinary tract infection from outside the hospital, or infection being treated but not contracted in hospital.

### **PL13 Nosocomial pneumonia**

Look for x-ray or lab reports that suggest pneumonia. Any pneumonia diagnosed in the hospital needs to be looked at carefully. Any infection starting in hospital needs to be considered nosocomial and an adverse event, unless clearly contracted from outside the hospital. Re-admissions could also represent pneumonia from a previous hospitalisation, particularly if antibiotic resistant.

### **PL14 Positive blood culture**

A positive blood culture at any time during hospitalisation must be investigated as an indicator of an adverse event. A surgical site infection, sepsis, infected lines, or any other hospital acquired infection is an adverse event.

### **PO1 Other event**

Any other event that has not been detected by the trigger tool but is an adverse event.



## 5. Further help and support

### Training

We recommend that each organisation has at least one person who has received formal training in trigger tool methodology and case note review. Together with the resources provided, including this guide, this person can then train others within the organisation.

At the time of writing, the Safer Care programme offers a limited number of one day 'quick start' training events as well as more comprehensive patient safety improvement programmes. We are also investing in Webex tutorials and hope to offer these as an alternative or top-up option in the future.

[www.institute.nhs.uk/triggertool](http://www.institute.nhs.uk/triggertool)

### Measurement for improvement

Measurement for improvement uses Statistical Process Control (SPC) to determine whether or not a trend is actually demonstrating a sustained change (improvement or deterioration) or just natural variation.

More information on SPC and variation can be found via this link:

[http://www.institute.nhs.uk/quality\\_and\\_service\\_improvement\\_tools/quality\\_and\\_service\\_improvement\\_tools/statistical\\_process\\_control.html](http://www.institute.nhs.uk/quality_and_service_improvement_tools/quality_and_service_improvement_tools/statistical_process_control.html)

### Methods for implementing service improvement

The methodology for implementing and sustainable improvement is based on the model for improvement. Also known as PDSA cycles, this model describes the cycle of Plan, Do, Study and Act. Further information can be found via this link:

[http://www.institute.nhs.uk/quality\\_and\\_service\\_improvement\\_tools/quality\\_and\\_service\\_improvement\\_tools/plan\\_do\\_study\\_act.html](http://www.institute.nhs.uk/quality_and_service_improvement_tools/quality_and_service_improvement_tools/plan_do_study_act.html)



## Additional Resources

Rozich JD, Haraden CR, Resar RK. **Adverse drug event trigger tool: A practical methodology for measuring medication related harm.** *Quality and Safety in Health Care.* 2003; 12:194-200.

Resar RK, Rozich JD, Simmonds T, Haraden CR. **A trigger tool to identify adverse events in the intensive care unit.** *Jt Comm, J Qual Saf* 32:585-90, Oct. 2006.

Sharek PJ, Horbar JG, Mason W, et al. **Adverse Events in the Neonatal Intensive Care Unit: Development, Testing, and Findings of a NICU-focused Trigger Tool to Identify Harm in North American NICUs.** *Pediatrics* 2006;118:1332-1340.  
[www.pediatrics.org/cgi/content/full/118/4/1332](http://www.pediatrics.org/cgi/content/full/118/4/1332)

Glenn S. Takata, MD, Wilbert Mason, MD, MPH, Carol Taketomo, PharmD, Tina Logsdon, MS, Paul J. Sharek, MD, MPH **Development, Testing, and Findings of a Pediatric-Focused Trigger Tool to Identify Medication-Related Harm in US Children's Hospitals.** *Pediatrics* 2008;121:e927-e935 [www.pediatrics.org/cgi/content/full/121/4/e927](http://www.pediatrics.org/cgi/content/full/121/4/e927)

Matlow A. et al. **The Development of the Canadian Paediatric Trigger Tool for Identifying Potential Adverse Events** *Healthcarequarterly* 2005; 8: 90-93

Matlow A and Cronin G, **Reducing Harm in Paediatric Care: Learning about Adverse Events using a Validated Canadian Paediatric Trigger Tool** For the CAPHC Paediatric Trigger Tool Research Group Montreal, October 14, 2007  
[http://www.caphc.org/documents\\_annual/2007/conference\\_ppts/14\\_10\\_2007/patient\\_safety/matlow\\_cronin.pdf](http://www.caphc.org/documents_annual/2007/conference_ppts/14_10_2007/patient_safety/matlow_cronin.pdf)
